# Supplementary material
Source: PubMed Central journal article supplement (PMC2838687)
Supplement: embor20101-s1.pdf [file embor20101-s1.pdf]

## Supplemental Materials

### Figure Legends

**Supplemental Figure 1:** Validation of transcript profiling experiments.

Graphs representing the Q-PCR validation of selected up (A) and down (B) -regulated genes identified by transcript profiling. Solid black bars represent Q-PCR results plotted next to Affymetrix chip-derived data (dashed outlines). Trends of expression are consistent for each locus successfully tested.

**Supplemental Figure 2:** Effects of *baz* modulation on tumour development.

Graphs representing tumour index (A) and tumour size (B) in flies with the *Hop<sup>Tuml</sup>* mutation and expressing indicated genotype. *UAS-GFP* and *RNAi-white* flies are used as negative controls. Significant changes were assessed using Students t-test (\*\* =  $p < 0.01$ ).  $n > 100$  for each genotype.

**Supplemental Table 1:** Genes differentially regulated by Upd

Table showing the 1168 genes differentially regulated in *Kc<sub>167</sub>* cells at one or more time points following stimulation by UPD. Data presented represents significant changes in log<sub>2</sub> expression at each time point with a score 0.0 indicating that any change measured was not classified as statistically significant by differential fold change analysis. GO terms and potential human homologues identified. Reciprocal best-hit alignments are indicated by ‘\*’ for human homologues. The top three alignments are shown for each gene where available at E-values  $< 10^{-10}$ . Six CG numbers (*CG34375*, *CG42340*, *CG34139*, *CG34373*, *CG6214*, *CG42276*) appear twice on this table due to differences in previous genome annotations used to develop the Affymetrix GeneChips.

**Supplemental Table 2:** Proliferation of human cell lines following knock down of *Drosophila* gene putative homologues. Cell lines include the cancer-derived HeLa and HepG2 as well as the human embryonic kidney-derived Hek293T cells. Numbers given represent the number of cells as a percentage of controls as well as the z-score for each result indicating the statistical significance of this deviation from 100%. z-scores  $> 1.8$  and  $< -1.8$  are highlighted (T. Horn and M. Boutros, unpublished data).

**Supplemental Table 3:** JAK/STAT regulated genes identified in both *Drosophila* and vertebrate transcriptomes. Putative homologues of the genes identified in this study (Supplemental Table 1) that appear in the lists reported in (Li *et al.*, 2007) and (Dauer *et al.*, 2005) are shown with their corresponding alignment E-values.

**Supplemental Table 4:** Oligonucleotides used for Q-PCR assays

**Supplemental Table 5:** Transformant IDs (VDRC) of *UAS-RNAi* stocks

Identifier numbers of individual stocks used for *in vivo* TI assays shown in Fig 3F are given. Details of these stocks and their generation are available at <http://www.vdrc.at/>

## Supplemental Materials & Methods

### *Upd conditioned media & Transcript profiling*

Conditioned media was prepared as described in (Harrison *et al.*, 1998) and assayed for activity using the *6x2xDrafluc* reporter (Müller *et al.*, 2005). For each transcript profiling condition and time point biological duplicates were treated with conditioned media (Upd or Mock) for 30min, washed and total RNA extracted after 2, 4, or 10h according to the Affymetrix protocols. 12 samples were hybridized to GeneChip® *Drosophila* Genome 2.0 arrays. The raw probe set data were analyzed using the PUMA package (Liu *et al.*, 2005; Pearson *et al.*, 2009) and used to generate intensity-dependent Z-scores for each Log<sub>2</sub> ratio (Yang *et al.*, 2002). Genes  $\geq$  two standard deviations from the mean were flagged as differentially expressed. Raw data has been deposited in the GEO database under accession number: GSE15584.

### *Transfection of HeLa cells with JAK2 V617F and Q-PCR*

HeLa cells grown in DMEM supplemented with 10% FCS at 37 °C were transfected with pMX-IRES-JAK2 V617F or empty vector (kind gifts of Stefan Constantinescu) using Lipofectamine transfection reagent (Invitrogen) according to the manufacturers protocol. Cells were harvested after 24hrs and total RNA extracted. Q-PCR was then performed in triplicate as described below and normalised to a  $\beta$ -actin control.

### *Q-PCR of Kc<sub>167</sub> cells*

Q-PCR used total RNA and primers shown in Supplemental Table 4, SYBR® Green JumpStart™ TaqReadyMix™ (Sigma-Aldrich) and standard Verso™ RT-PCR (Thermo Scientific) protocol. PCR was undertaken in a Biorad MyIQ™ detection system and performed in triplicate. The data were analyzed by  $\Delta\Delta C_T$  and normalised to the ribosomal protein-encoding control gene *Rpl32* as previously described in Livak and Schmittgen, 2001.

### *In vivo analysis*

A recombinant between P[G5] *dome-Gal4* (Bourbon *et al.*, 2002) and *hop<sup>Tuml</sup>* (Luo *et al.*, 1995) was generated and verified on the basis of Gal4 expression and phenotype. Virgin

recombinant females balanced over FM7 were crossed to males carrying the appropriate *UAS-RNAi* constructs described in (Dietzl *et al.*, 2007); Table S5), *UAS-Baz* (Kuchinke *et al.*, 1998), *UAS-SOCS36E-GFP* (Karsten & Zeidler unpublished) and *UAS-SOCS36E* (Almudi *et al.*, 2009). Crosses were set up between 40-50 recombinant virgins and >15 males in yeasted bottles, aged at 19°C for 24h before transfer to new bottles. Original bottles were kept for a further 24h at 19°C before transfer to 29°C (Fig 3F) or 25°C (Fig 3D & E, Fig S2A & B) for 12 days. Adults were then collected and either scored immediately or frozen at -20°C for later analysis. All scoring was done 'blind' with coded vials decrypted only after all data had been gathered. The average tumour index (TI) for each cross was calculated as previously described (Shi *et al.*, 2006).

For blood cell pictures wandering third instar larvae of the appropriate genotype were washed in water, dried and bled by tearing the larva with two pairs of forceps in a 15  $\mu$ l drop of serum-free Schneider's medium placed on a hemocytometer for immediate counting.

For adult fly photographs individuals were first frozen at -20°C before selected individuals were arranged on a white ceramic tile and photographed using a Zeiss STEMI 2000-C stereomicroscope and QIMAGING Micropublisher camera system.

### *Bioinformatics*

The 1168 genes regulated by UPD in at least one time point were clustered using the average linkage method (Eisen *et al.*, 1998) and examined for association to gene ontology (GO) categories using GoMiner (Zeeberg *et al.*, 2005). Statistical analysis (via 'Fisher's exact test') calculates the level of significance of enriched GO categories.

Differential expression are shown as MA plots where  $M = \log_2(\text{Upd}) - \log_2(\text{Mock})$  and  $A = (\log_2(\text{Upd}) + \log_2(\text{Mock})) / 2$ . For promoter analysis, 3kb upstream region of 1168 UPD-regulated genes and a similar sized group of random *Drosophila* genes were retrieved and searched for TTC(3n or 4n)GAA binding sites. Enrichment of STAT92E binding sites was tested using unpaired t-tests.

Putative human homologues of the 1168 *Drosophila* genes were identified using a local installation of BLASTp, aligning protein sequences against the human proteome obtained

from the Integr8 FTP site (<ftp://ftp.ebi.ac.uk/pub/databases/integr8/fasta/proteomes/>). An E-value cut-off of  $10^{-10}$  was used, and where possible reciprocal best-hit or top three scoring alignments were taken. In-house Perl scripts were designed to parse BLAST files giving a total of 1818 putative homologues.

Overlap between homologues identified here and the 100 genes identified as being differentially regulated from human lung cells following STAT3 stimulation (Dauer et al., 2005), was identified using in-house Perl scripts – 8 proteins were found to overlap. Significance was assessed by constructing a list of 100 randomly selected genes from the human genome and counting overlap to our putative homologues. The test was repeated 1000 times to give a distribution (mean = 3.66; S.D = 1.86), significance was assessed by z-score analysis (2.34). A similar comparative analysis was carried out for a study on mouse lung tissue (Li et al., 2007) resulting in an overlap of 12, which was found to be significant (mean = 4.94, S.D. = 2.17, z-score = 3.25).

Proliferation data of HeLa, Hek293T and HepG2 cells was measured following treatment with genome wide siRNA library (Dharmacon) and was kindly made available by Michael Boutros and Thomas Horn (DKFZ, Heidelberg). As data is unpublished and available on a gene by gene basis, only human homologues of the short listed *Drosophila* genes are shown. Full genome data is available at [www.GenomeRNAi.org](http://www.GenomeRNAi.org) (Horn et al., 2007).

## References

- Almudi, I., Stocker, H., Hafen, E., Corominas, M. and Serras, F. (2009) SOCS36E specifically interferes with Sevenless signaling during *Drosophila* eye development *Dev Biol* **326**: 212-223.
- Bourbon, H.M., Gonzy-Treboul, G., Peronnet, F., Alin, M.F., Ardourel, C., Benassayag, C., Cribbs, D., Deutsch, J., Ferrer, P., Haenlin, M., Lepesant, J.A., Noselli, S. and Vincent, A. (2002) A P-insertion screen identifying novel X-linked essential genes in *Drosophila* *Mech Dev* **110**: 71-83.
- Dauer, D.J., Ferraro, B., Song, L., Yu, B., Mora, L., Buettner, R., Enkemann, S., Jove, R. and Haura, E.B. (2005) Stat3 regulates genes common to both wound healing and cancer *Oncogene* **24**: 3397-3408.
- Dietzl, G., Chen, D., Schnorrer, F., Su, K.C., Barinova, Y., Fellner, M., Gasser, B., Kinsey, K., Oppel, S., Scheiblauer, S., Couto, A., Marra, V., Keleman, K. and Dickson, B.J. (2007) A genome-wide transgenic RNAi library for conditional gene inactivation in *Drosophila* *Nature* **448**: 151-156.

- Eisen, M.B., Spellman, P.T., Brown, P.O. and Botstein, D. (1998) Cluster analysis and display of genome-wide expression patterns *Proc Natl Acad Sci U S A* **95**: 14863-14868.
- Harrison, D.A., McCoon, P.E., Binari, R., Gilman, M. and Perrimon, N. (1998) Drosophila unpaired encodes a secreted protein that activates the JAK signaling pathway *Genes Dev* **12**: 3252-3263.
- Horn, T., Arziman, Z., Berger, J. and Boutros, M. (2007) GenomeRNAi: a database for cell-based RNAi phenotypes *Nucleic Acids Res* **35**: D492-497.
- Kuchinke, U., Grawe, F. and Knust, E. (1998) Control of spindle orientation in Drosophila by the Par-3-related PDZ-domain protein Bazooka *Curr Biol* **8**: 1357-1365.
- Li, Y., Du, H., Qin, Y., Roberts, J., Cummings, O.W. and Yan, C. (2007) Activation of the signal transducers and activators of the transcription 3 pathway in alveolar epithelial cells induces inflammation and adenocarcinomas in mouse lung *Cancer Res* **67**: 8494-8503.
- Liu, X., Milo, M., Lawrence, N.D. and Rattray, M. (2005) A tractable probabilistic model for Affymetrix probe-level analysis across multiple chips *Bioinformatics* **21**: 3637-3644.
- Livak, K.J. and Schmittgen, T.D. (2001) Analysis of relative gene expression data using real-time quantitative PCR and the 2(-Delta Delta C(T)) Method *Methods* **25**: 402-408.
- Luo, H., Hanratty, W.P. and Dearolf, C.R. (1995) An amino acid substitution in the Drosophila hopTum-1 Jak kinase causes leukemia-like hematopoietic defects *Embo J* **14**: 1412-1420.
- Müller, P., Kuttenukeuler, D., Gesellchen, V., Zeidler, M.P. and Boutros, M. (2005) Identification of JAK/STAT signalling components by genome-wide RNA interference *Nature* **436**: 871-875.
- Pearson, R.D., Liu, X., Sanguinetti, G., Milo, M., Lawrence, N.D. and Rattray, M. (2009) puma: a Bioconductor package for propagating uncertainty in microarray analysis *BMC Bioinformatics* **10**: 211.
- Shi, S., Calhoun, H.C., Xia, F., Li, J., Le, L. and Li, W.X. (2006) JAK signaling globally counteracts heterochromatic gene silencing *Nat Genet* **38**: 1071-1076.
- Yang, I.V., Chen, E., Hasseman, J.P., Liang, W., Frank, B.C., Wang, S., Sharov, V., Saeed, A.I., White, J., Li, J., Lee, N.H., Yeatman, T.J. and Quackenbush, J. (2002) Within the fold: assessing differential expression measures and reproducibility in microarray assays *Genome Biol* **3**: research0062.
- Zeeberg, B.R., Qin, H., Narasimhan, S., Sunshine, M., Cao, H., Kane, D.W., Reimers, M., Stephens, R.M., Bryant, D., Burt, S.K., Elnekave, E., Hari, D.M., Wynn, T.A., Cunningham-Rundles, C., Stewart, D.M., Nelson, D. and Weinstein, J.N. (2005) High-Throughput GoMiner, an 'industrial-strength' integrative gene ontology tool for interpretation of multiple-microarray experiments, with application to studies of Common Variable Immune Deficiency (CVID) *BMC Bioinformatics* **6**: 168.

# Supplemental Figure 1

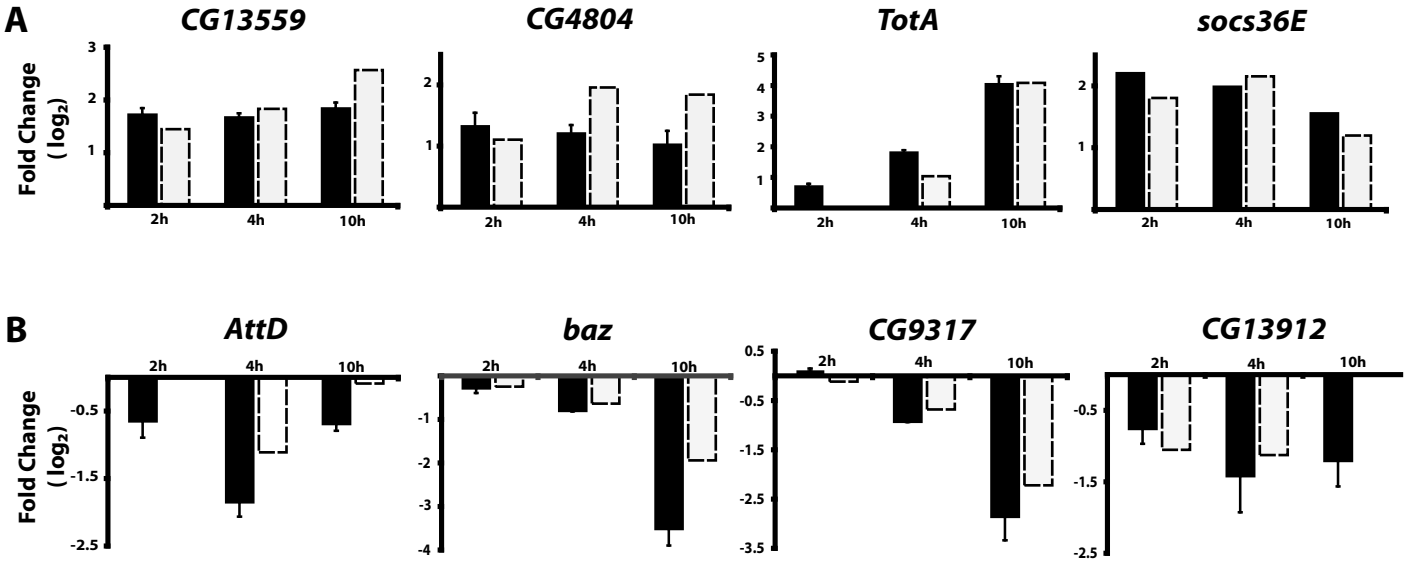

Supplemental Figure 2

A

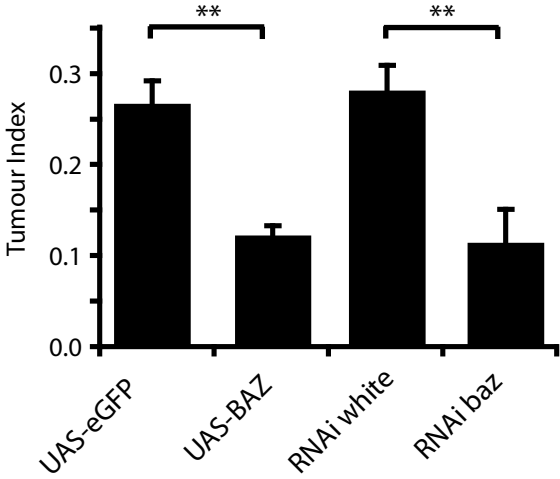

B

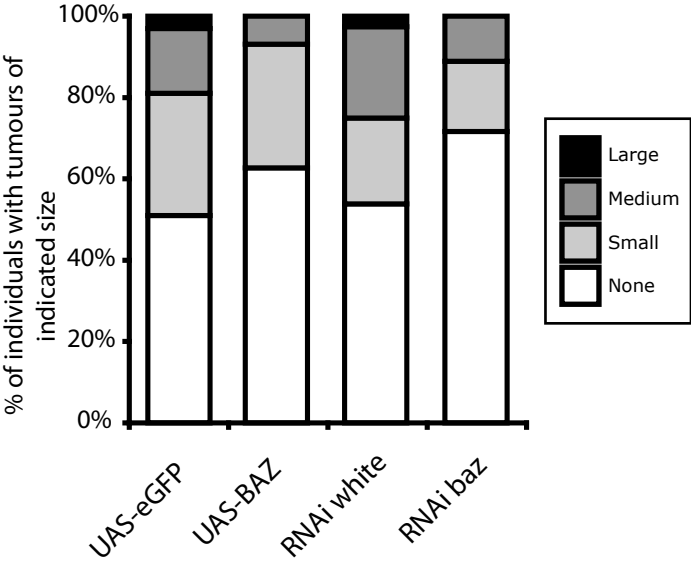

Supplemental Table 1

| <i>D. melanogaster</i> |           | Fold Change (log2) |      |      | Gene Ontologies                                   |                                              | <i>H. sapiens</i>             |  |
|------------------------|-----------|--------------------|------|------|---------------------------------------------------|----------------------------------------------|-------------------------------|--|
| Gene Name              | CG number | 2h                 | 4h   | 10h  | Biological Process                                | Molecular Function                           | Gene Name                     |  |
| Aats-glupro            | CG5394    | 0.0                | 0.0  | -1.1 | glutamate-tRNA aminoacylation                     | glutamate-tRNA ligase activity               | EPRS QARS EARS2               |  |
| Acon                   | CG9244    | 0.0                | 0.3  | -0.4 | tricarboxylic acid cycle                          | aconitate hydratase activity                 | -                             |  |
| Adh                    | CG3481    | 0.4                | 0.5  | -2.0 | ethanol oxidation                                 | alcohol dehydrogenase activity               | HPGD                          |  |
| Alas                   | CG3017    | 0.0                | 0.0  | -1.1 | heme biosynthetic process                         | 5-aminolevulinat synthase activity           | ALAS2 ALAS1 GCAT              |  |
| alpha-Est3             | CG1257    | 0.0                | 0.0  | -2.0 | carboxylesterase activity                         | carboxylesterase activity                    | CES8 ACHE CES7                |  |
| alpha-Man-II           | CG18802   | 0.0                | 0.0  | -1.5 | protein amino acid glycosylation                  | mannosyl-oligosaccharide 1,3-1,6-alpha-m     | MAN2A2* MAN2A1 MAN2B1         |  |
| alphaCop               | CG7961    | 0.0                | 0.1  | -1.1 | retrograde vesicle-mediated transport, Golgi to E | protein binding                              | COPA* COPB2 PAFAH1B1          |  |
| amon                   | CG6438    | -0.4               | -0.3 | -1.5 | peptide hormone processing                        | peptidase activity                           | PCSK2 FURIN PCSK6             |  |
| amos                   | CG10393   | 0.0                | -2.3 | 0.6  | regulation of transcription, DNA-dependent        | transcription factor activity                | ACE ACE2                      |  |
| Ance-2                 | CG15869   | -0.8               | -0.6 | -0.2 | proteolysis                                       | peptidyl-dipeptidase activity                | ACE ACE2                      |  |
| AP-1sigma              | CG5864    | 0.0                | 0.1  | -2.0 | neurotransmitter secretion                        | protein transporter activity                 | AP1S1* AP1S3 DKFZp779P0659    |  |
| Art2                   | CG3675    | 0.0                | 0.0  | -2.8 | -                                                 | protein-arginine N-methyltransferase activi  | PRMT8 PRMT1 PRMT3             |  |
| aru                    | CG4276    | 0.0                | 0.0  | -2.1 | epidermal growth factor receptor signaling pathw  | -                                            | RPS27A UBC UBB                |  |
| ash1                   | CG8887    | -1.7               | -0.1 | 0.0  | embryonic development via the syncytial blastoc   | histone methyltransferase activity           | ASH1L SETD2 NSD1              |  |
| Ast-C                  | CG14919   | 0.0                | 1.6  | 0.0  | neuropeptide signaling pathway                    | neuropeptide hormone activity                | -                             |  |
| Atg18                  | CG7986    | 0.0                | 0.0  | -1.0 | autophagy                                         | -                                            | WIPI2* WIPI1 WDR45L           |  |
| Atg2                   | CG1241    | 0.0                | 0.0  | -1.9 | autophagy                                         | -                                            | ATG2B ATG2A                   |  |
| Atg4                   | CG4428    | 0.0                | 0.0  | -1.0 | -                                                 | cysteine-type endopeptidase activity         | ATG4B ATG4A ATG4D             |  |
| AttA                   | CG10146   | 0.0                | -1.3 | -0.1 | defense response to Gram-negative bacterium       | -                                            | -                             |  |
| AttB                   | CG18372   | 0.0                | -1.4 | 0.0  | defense response to bacterium                     | -                                            | -                             |  |
| AttC                   | CG3389    | 0.1                | -3.2 | 0.0  | antibacterial humoral response                    | -                                            | -                             |  |
| AttD                   | CG7629    | 0.0                | -1.1 | -0.1 | antibacterial humoral response                    | -                                            | -                             |  |
| Awh                    | CG1072    | 0.0                | -0.5 | 2.2  | imaginal disc development                         | transcription factor activity                | LHX8 LHX6 LHX9                |  |
| b                      | CG7811    | 0.0                | 0.0  | -2.2 | visual behavior                                   | glutamate decarboxylase activity             | CSAD* GADL1 GAD2              |  |
| bab1                   | CG9097    | -2.0               | 0.3  | 1.1  | sex differentiation                               | transcription factor activity                | -                             |  |
| baz                    | CG5055    | -0.2               | -0.6 | -1.9 | establishment or maintenance of polarity of emb   | protein kinase C binding                     | PARD3 PARD3B MPDZ             |  |
| bcd                    | CG1034    | 0.0                | -2.4 | 0.0  | anterior region determination                     | specific RNA polymerase II transcription fac | -                             |  |
| beat-IIB               | CG4135    | 0.9                | 0.0  | 1.5  | -                                                 | -                                            | -                             |  |
| Best3                  | CG12327   | 2.3                | 0.0  | 0.0  | -                                                 | -                                            | BEST3 BEST2 BEST1             |  |
| beta-Spec              | CG5870    | 0.0                | 0.0  | -2.3 | maintenance of presynaptic active zone structur   | cytoskeletal protein binding                 | SPTBN1* SPTBN2* SPTB* SPTBN4* |  |
| bib                    | CG8203    | -1.1               | -2.4 | 0.0  | ectoderm development                              | water channel activity                       | AQP1 AQP4 AQP2                |  |
| blot                   | CG3897    | 0.0                | 0.0  | -2.3 | morphogenesis of an epithelium                    | neurotransmitter transporter activity        | -                             |  |
| blue                   | CG6451    | 0.0                | -0.1 | -2.0 | regulation of pole plasm oskar mRNA localizati    | -                                            | NEURL4*                       |  |
| Brd                    | CG3096    | 2.0                | 0.0  | 0.3  | Notch signaling pathway                           | -                                            | calmodulin inhibitor activity |  |
| bru-2                  | CG31761   | 0.0                | -2.1 | -2.2 | negative regulation of translation                | mRNA binding                                 | CUGBP1 CUGBP2 BRUNOL4         |  |
| BRWD3                  | CG31132   | 0.0                | 0.0  | -1.6 | phagocytosis, engulfment                          | -                                            | PHIP BRWD3 BRWD1              |  |
| Buffy                  | CG8238    | 0.0                | 0.0  | -2.2 | apoptosis                                         | -                                            | BOK                           |  |
| c(2)M                  | CG4249    | 0.0                | -0.6 | 0.0  | meiosis                                           | -                                            | -                             |  |
| c11.1                  | CG12132   | 0.0                | 0.0  | -2.2 | -                                                 | -                                            | -                             |  |
| c12.2                  | CG12149   | 0.0                | 0.0  | -1.8 | -                                                 | binding                                      | HEATR7A HEATR7B1              |  |
| cactin                 | CG1676    | 0.0                | 0.0  | -0.9 | dorsal/ventral axis specification                 | ATP binding                                  | KIAA0564                      |  |
| cad88C                 | CG3897    | -1.1               | -2.4 | 0.0  | calcium-dependent cell-cell adhesion              | calcium ion binding                          | C19orf29*                     |  |
| Cad96Cb                | CG13664   | 0.7                | 2.0  | -0.2 | calcium-dependent cell-cell adhesion              | phosphopantetheine binding                   | CDH23 FAT4 FAT1               |  |
| Caf1-180               | CG12109   | 0.0                | 0.0  | -1.5 | nucleosome assembly                               | -                                            | FAT1 PCDHB1 PCDHB7            |  |
| Caki                   | CG6703    | 0.0                | 0.0  | -1.6 | adult walking behavior                            | guanylate kinase activity                    | CASK* MPP1 MPP2               |  |
| CanA-14F               | CG9819    | 0.0                | -1.0 | -1.3 | protein amino acid dephosphorylation              | protein serine/threonine phosphatase activi  | -                             |  |
| CanA1                  | CG1455    | -0.1               | 2.1  | 0.2  | protein amino acid dephosphorylation              | protein serine/threonine phosphatase activi  | PPP3CA* PPP3CB* PPP3CC        |  |
| capaR                  | CG14575   | 0.0                | 0.7  | 0.3  | G-protein coupled receptor protein signaling pati | neuropeptide receptor activity               | NMUR2 GHSR NMUR1              |  |
| caps                   | CG11282   | -0.1               | -0.1 | -3.8 | axon guidance                                     | protein binding                              | LRRN2 LGR5 LRRN1              |  |
| capr                   | CG33979   | -0.1               | 0.1  | -0.6 | actin polymerization or depolymerization          | actin binding                                | CAP1* CAP2                    |  |
| CcapR                  | CG33344   | -0.8               | -0.4 | 0.8  | G-protein coupled receptor protein signaling pati | vasopressin receptor activity                | NPSR1* AVPR1B AVPR1A          |  |
| Cdi5                   | CG8203    | -1.1               | -2.4 | 0.0  | protein amino acid phosphorylation                | cyclin-dependent protein kinase activity     | CDK5 CDK3 CDK2                |  |
| CecB                   | CG1878    | -0.1               | -1.7 | 0.0  | defense response to bacterium                     | -                                            | -                             |  |
| CecC                   | CG1373    | -0.1               | -1.3 | 0.0  | defense response to Gram-negative bacterium       | -                                            | -                             |  |
| cenB1A                 | CG6742    | 0.0                | 0.0  | -0.9 | phagocytosis, engulfment                          | ARF GTPase activator activity                | ACAP3* ACAP2 ACAP1            |  |
| CG10017                | CG34340   | 0.1                | 0.0  | 1.3  | dendrite morphogenesis                            | transcription factor activity                | DRGX ARX PHOX2B               |  |
| CG10019                | CG10019   | -0.1               | 0.0  | 2.1  | -                                                 | monocarboxylic acid transmembrane transp     | SLC16A12 SLC16A14 SLC16A7     |  |
| CG10029                | CG10029   | -1.6               | -0.4 | 0.0  | cell redox homeostasis                            | protein disulfide isomerase activity         | ERP44 PDIA4 PDIA3             |  |
| CG10035                | CG10035   | 2.7                | 0.0  | -0.6 | -                                                 | -                                            | -                             |  |
| CG10062                | CG10062   | 0.0                | 0.0  | -1.0 | proteolysis                                       | peptidase activity                           | ERP1                          |  |
| CG10077                | CG10077   | 0.0                | 0.0  | -1.0 | -                                                 | RNA helicase activity                        | -                             |  |
| CG10083                | CG10083   | 0.0                | -0.1 | -    | cell migration                                    | actin binding                                | DBNL* DBN1 CTTN               |  |
| CG10089                | CG10089   | 3.1                | 0.0  | 0.0  | protein amino acid dephosphorylation              | protein tyrosine/serine/threonine phosphat   | DUSP22* DUSP15 DUSP6          |  |
| CG10102                | CG10102   | 0.0                | 0.2  | -0.4 | -                                                 | zinc ion binding                             | -                             |  |
| CG10140                | CG10140   | 0.0                | 0.0  | -3.0 | chitin metabolic process                          | chitin binding                               | -                             |  |
| CG10170                | CG10170   | -2.6               | 0.0  | 0.0  | metabolic process                                 | 2-hydroxyacylsphingosine 1-beta-galactosy    | UGT8 UGT1A10 UGT1A9           |  |
| CG10182                | CG10182   | 0.0                | -1.7 | 0.0  | -                                                 | transferase activity, transferrin groups oth | -                             |  |
| CG10184                | CG10184   | -0.5               | 0.1  | 0.0  | amino acid metabolic process                      | threonine aldolase activity                  | -                             |  |
| CG10188                | CG10188   | 0.0                | 0.0  | -2.0 | regulation of Rho protein signal transduction     | Rho quanyl-nucleotide exchange factor acti   | AKAP13* ARHGEP18 RGNEF        |  |
| CG10237                | CG10237   | 0.0                | -1.0 | -0.1 | transport                                         | retinal binding                              | TTPAL RLBP1L2 RLBP1L1         |  |
| CG10252                | CG10252   | -2.3               | -0.1 | 0.0  | -                                                 | 1-phosphatidylinositol 4-kinase activity     | ODF3L2* ODF3 ODF3B            |  |
| CG10260                | CG10260   | 0.0                | 0.0  | -2.3 | phosphorylation                                   | DNA binding                                  | P14KA* P14KAP2 P14KB          |  |
| CG10262                | CG10262   | -1.1               | -0.1 | -0.1 | DNA replication                                   | -                                            | PCNA                          |  |
| CG10274                | CG10274   | 0.0                | 0.0  | -2.0 | -                                                 | zinc ion binding                             | ZNF136 ZFP90 ZNF91            |  |
| CG10339                | CG10339   | 0.0                | -0.2 | -2.9 | transport                                         | carboxylesterase activity                    | NLGN4Y NLGN3 NLGN4X           |  |
| CG10361                | CG10361   | 0.0                | 0.0  | -2.0 | amino acid metabolic process                      | glycine C-acetyltransferase activity         | GCAT ALAS2 ALAS1              |  |
| CG10426                | CG10426   | -0.2               | 0.0  | -2.9 | dephosphorylation                                 | inositol trisphosphate phosphatase activity  | INPP5E* INPP5B SYNJ1          |  |
| CG10465                | CG10465   | 0.0                | 0.0  | 0.6  | potassium ion transport                           | protein binding                              | KCTD10* TNFAIP1 KCTD13        |  |
| CG10494                | CG10494   | 0.0                | -2.2 | -3.2 | -                                                 | DNA binding                                  | -                             |  |
| CG10505                | CG10505   | -0.6               | 0.0  | 0.0  | response to zinc ion                              | ATPase activity, coupled to transmembrane    | ABCC4* ABCC1* ABCC3*          |  |
| CG10514                | CG10514   | -1.4               | 0.0  | 0.0  | -                                                 | -                                            | -                             |  |
| CG10542                | CG10542   | -0.1               | 0.0  | -2.0 | peripheral nervous system development             | protein binding                              | RNF40* RNF20                  |  |
| CG10543                | CG10543   | 0.0                | -3.2 | -2.4 | -                                                 | zinc ion binding                             | ZNF567 ZNF133 ZFP112          |  |
| CG10621                | CG10621   | 0.0                | 0.0  | -3.5 | -                                                 | selenocysteine methyltransferase activity    | -                             |  |
| CG10662                | CG34343   | 0.0                | 0.2  | -1.6 | defense response to Gram-negative bacterium       | nucleoside-triphosphatase activity           | -                             |  |
| CG10677                | CG10677   | -2.0               | 0.0  | 0.0  | -                                                 | -                                            | -                             |  |
| CG10702                | CG10702   | 0.0                | 0.0  | -2.1 | transmembrane receptor protein tyrosine kinase    | insulin-like growth factor receptor activity | INSRR INSR IGF1R              |  |
| CG10732                | CG10732   | 0.0                | 0.0  | -2.5 | -                                                 | -                                            | -                             |  |
| CG10737                | CG10737   | 0.0                | -0.1 | -2.2 | intracellular signaling cascade                   | diacylglycerol binding                       | -                             |  |
| CG10738                | CG10738   | 0.0                | -0.1 | -2.5 | signal transduction                               | guanylate cyclase activity                   | NPR2 NPR1 GUCY2F              |  |
| CG10764                | CG10764   | 0.5                | 1.3  | 2.5  | proteolysis                                       | serine-type endopeptidase activity           | F9 PR55B F10                  |  |
| CG10824                | CG10824   | 0.3                | 3.4  | 5.4  | proteolysis                                       | protein binding                              | LRRC70 LGR6 LRRC26            |  |
| CG10845                | CG10845   | 0.0                | 0.7  | 0.0  | microtubule-based movement                        | motor activity                               | KIF5C KIF5B                   |  |
| CG10881                | CG10881   | 0.0                | -0.6 | 0.0  | translational initiation                          | mRNA binding                                 | EIF3G                         |  |
| CG10882                | CG10882   | 0.0                | 0.0  | -0.9 | intracellular protein transport                   | serine-type endopeptidase activity           | SEC24D* SEC24C SEC24B         |  |
| CG10887                | CG10887   | 0.0                | 0.0  | 3.0  | -                                                 | -                                            | LEO1                          |  |
| CG1090                 | CG1090    | 0.1                | -0.3 | -1.7 | sodium ion transport                              | calcium,potassium:sodium antiporter activ    | SLC24A2 SLC24A5 SLC24A4       |  |
| CG10924                | CG10924   | 0.0                | -1.1 | -0.1 | gluconeogenesis                                   | phosphoenolpyruvate carboxykinase (GTP)      | PCK2 PCK1                     |  |
| CG10987                | CG10987   | 0.0                | 1.1  | 0.0  | -                                                 | -                                            | -                             |  |
| CG10990                | CG10990   | -0.1               | 0.1  | -0.9 | -                                                 | -                                            | -                             |  |
| CG11008                | CG11008   | 0.0                | -0.9 | -1.7 | -                                                 | -                                            | -                             |  |
| CG11029                | CG11029   | 0.0                | 1.4  | 0.0  | lipid metabolic process                           | lysophospholipase activity                   | PLB1                          |  |
| CG11033                | CG11033   | 0.0                | 0.0  | -1.7 | -                                                 | -                                            | KDM2A* KDM2B FBXL10           |  |
| CG11043                | CG11043   | 0.0                | 0.0  | -2.3 | mitochondrial electron transport, cytochrome c t  | cytochrome-c oxidase activity                | -                             |  |
| CG11093                | CG11093   | 0.0                | -0.8 | -0.4 | -                                                 | protein binding                              | CORL2* LBXCOR1 SKI            |  |
| CG11112                | CG11112   | 0.0                | 0.0  | 2.1  | -                                                 | -                                            | -                             |  |
| CG11141                | CG11141   | 0.0                | 0.0  | -1.6 | -                                                 | -                                            | KIAA0329                      |  |
| CG11198                | CG11198   | 0.0                | 0.0  | -2.4 | fatty acid biosynthetic process                   | acetyl-CoA carboxylase activity              | ACACA* ACACB* MCCC1           |  |
| CG11241                | CG11241   | -0.6               | 0.0  | 0.0  | -                                                 | alanine-glyoxylate transaminase activity     | AGXT2 AGXT2L1 AGXT2L2         |  |
| CG11263                | CG11263   | 0.0                | -0.8 | -0.1 | -                                                 | nucleic acid binding                         | -                             |  |
| CG11265                | CG11265   | 0.0                | 0.0  | -2.1 | sister chromatid cohesion                         | DNA-directed DNA polymerase activity         | PAPD5* POLS                   |  |
| CG11403                | CG11403   | 0.0                | 0.0  | -1.8 | nucleotide-excision repair                        | helicase activity                            | DDX11* DDX12 RTEL1            |  |
| CG11407                | CG11407   | 0.0                | 0.0  | -2.3 | metabolic process                                 | long-chain fatty acid transporter activity   | ACSF2 ACSM2B ACSM3            |  |
| CG11414                | CG11414   | 0.0                | 0.0  | -1.0 | -                                                 | protein binding                              | ZNF598*                       |  |



| <i>D. melanogaster</i> |           |      | Fold Change<br>(log2) | Gene Ontologies | <i>H. sapiens</i> |                                                |
|------------------------|-----------|------|-----------------------|-----------------|-------------------|------------------------------------------------|
| Gene Name              | CG number | 2h   | 4h                    | 10h             | Gene Name         |                                                |
| CG1142                 | CG1142    | 0.0  | 0.0                   | 0.5             | -                 | DNTTIP2                                        |
| CG11426                | CG11426   | 0.0  | 0.8                   | 3.0             | -                 | PPAP2B PPAP2A PPAP2C                           |
| CG11438                | CG11438   | 2.0  | -0.3                  | -0.1            | -                 | PPAP2A PPAP2B PPAP2C                           |
| CG11458                | CG11458   | -1.2 | -0.6                  | 0.2             | -                 | -                                              |
| CG11504                | CG11504   | 0.0  | 0.0                   | -1.6            | -                 | -                                              |
| CG11505                | CG11505   | 0.0  | 0.0                   | -3.1            | -                 | LARP4* LARP5 LARP1                             |
| CG11509                | CG11509   | 0.0  | 1.0                   | -1.3            | -                 | -                                              |
| CG11526                | CG11526   | 0.0  | 0.0                   | -1.1            | -                 | FAM40A* FAM40B*                                |
| CG11538                | CG11538   | 0.0  | 0.0                   | -2.0            | -                 | -                                              |
| CG11552                | CG11552   | -2.0 | 0.0                   | 0.1             | -                 | PSMD8                                          |
| CG11555                | CG11555   | 0.0  | 0.1                   | 1.0             | -                 | -                                              |
| CG11581                | CG11581   | 0.1  | 1.8                   | -0.1            | -                 | -                                              |
| CG11583                | CG11583   | 0.0  | 0.3                   | 0.6             | -                 | BXDC2                                          |
| CG11588                | CG11588   | 0.1  | -2.1                  | 0.1             | -                 | -                                              |
| CG11594                | CG11594   | 0.0  | 0.0                   | -2.7            | -                 | FGGY*                                          |
| CG11619                | CG11619   | -0.1 | -0.7                  | 0.0             | -                 | GDE5 RP5-1022P6.2                              |
| CG11630                | CG11630   | 0.0  | -1.5                  | 0.0             | -                 | -                                              |
| CG11656                | CG11656   | 0.0  | -3.0                  | -0.3            | -                 | -                                              |
| CG11666                | CG11666   | 0.7  | 0.0                   | -2.8            | -                 | -                                              |
| CG11674                | CG11674   | 0.2  | 0.0                   | 1.5             | -                 | -                                              |
| CG11775                | CG11775   | 0.0  | -0.6                  | -2.0            | -                 | -                                              |
| CG11786                | CG11786   | -0.6 | 0.0                   | 0.0             | -                 | -                                              |
| CG11897                | CG11897   | 0.0  | 0.0                   | -1.9            | -                 | -                                              |
| CG11905                | CG11905   | 0.5  | 0.0                   | 0.5             | -                 | ABCC4* ABCC1* ABCC3* ABCC2                     |
| CG11915                | CG11915   | -3.5 | -0.1                  | 0.0             | -                 | -                                              |
| CG11928                | CG34351   | -2.0 | 0.1                   | 0.6             | -                 | -                                              |
| CG11940                | CG11940   | 0.0  | 0.0                   | -2.1            | -                 | RAPH1* APBB1IP GRB14                           |
| CG11943                | CG11943   | 0.0  | 0.0                   | -2.0            | -                 | NUP205                                         |
| CG11984                | CG11984   | 0.0  | -1.3                  | -               | -                 | KCMF1                                          |
| CG12017                | CG12017   | 1.3  | 0.0                   | 0.1             | -                 | -                                              |
| CG12061                | CG12061   | 0.3  | -1.7                  | 0.0             | -                 | -                                              |
| CG12065                | CG12065   | 0.0  | 0.0                   | -3.5            | -                 | SLC24A4 SLC24A3 SLC24A2                        |
| CG12147                | CG12147   | -1.1 | 0.0                   | 0.0             | -                 | -                                              |
| CG12207                | CG12207   | 0.0  | 0.0                   | -1.8            | -                 | CSNK1A1 CSNK1A1L CSNK1E                        |
| CG12439                | CG12439   | 2.7  | -1.9                  | -0.2            | -                 | LYSMD1 LYSMD2                                  |
| CG12488                | CG12488   | 0.0  | 0.0                   | -3.2            | -                 | -                                              |
| CG12523                | CG12523   | -0.5 | 1.5                   | -0.1            | -                 | -                                              |
| CG12531                | CG12531   | -1.8 | 2.7                   | -0.1            | -                 | -                                              |
| CG12539                | CG12539   | 0.0  | -2.3                  | -0.2            | -                 | SLC7A14 SLC7A3 SLC7A1                          |
| CG12543                | CG12543   | -0.7 | 0.0                   | 0.0             | -                 | CHDH                                           |
| CG12551                | CG12551   | -2.3 | 1.7                   | 0.1             | -                 | KCNK10                                         |
| CG12584                | CG34425   | -0.1 | 0.0                   | -1.5            | -                 | -                                              |
| CG12602                | CG12602   | 0.0  | 1.1                   | 0.2             | -                 | -                                              |
| CG12609                | CG12609   | -2.5 | 0.0                   | 0.2             | -                 | ATP6V0A4 ATP6V0A1 ATP6V0A2                     |
| CG12655                | CG12655   | 0.0  | 0.0                   | 2.9             | -                 | -                                              |
| CG12656                | CG12656   | 0.0  | 0.0                   | 1.5             | -                 | -                                              |
| CG12674                | CG12674   | -0.5 | -2.5                  | 0.0             | -                 | -                                              |
| CG12703                | CG12703   | 0.0  | 0.0                   | -1.8            | -                 | -                                              |
| CG12716                | CG12716   | -1.7 | 0.0                   | 0.7             | -                 | ATPase activity, coupled to transmembrane      |
| CG12789                | CG12789   | 0.0  | -1.4                  | -0.7            | -                 | ABCD3* ABCD2 ABCD1                             |
| CG12798                | CG12798   | -0.2 | -1.1                  | 0.0             | -                 | -                                              |
| CG12802                | CG34360   | -2.2 | 0.0                   | 0.5             | -                 | scavenger receptor activity                    |
| CG12816                | CG34108   | 0.0  | 0.0                   | 2.8             | -                 | SCARB1 SCARB2 CD36                             |
| CG12817                | CG12817   | 0.0  | 1.4                   | -0.1            | -                 | MAP2K4                                         |
| CG12831                | CG12831   | 2.0  | -0.4                  | 1.1             | -                 | ZNF704 ZNF395 SLC24A4RG                        |
| CG12861                | CG12861   | 0.0  | 2.1                   | -0.4            | -                 | -                                              |
| CG12902                | CG12902   | 0.0  | 1.8                   | -0.8            | -                 | -                                              |
| CG12909                | CG12909   | 0.0  | 0.4                   | 0.6             | -                 | -                                              |
| CG1294                 | CG1294    | -0.9 | 0.0                   | 0.1             | -                 | LYAR                                           |
| CG12959                | CG34365   | -0.4 | -1.1                  | 0.0             | -                 | -                                              |
| CG12991                | CG12991   | 0.0  | -1.1                  | 0.0             | -                 | -                                              |
| CG13002                | CG13002   | -0.8 | -0.8                  | 0.1             | -                 | -                                              |
| CG13008                | CG13008   | -0.7 | 2.0                   | -0.1            | -                 | -                                              |
| CG13038                | CG13038   | 1.1  | 0.0                   | 0.8             | -                 | -                                              |
| CG13042                | CG13042   | 0.0  | 0.0                   | -1.5            | -                 | -                                              |
| CG13062                | CG13062   | 0.0  | -0.7                  | 0.0             | -                 | -                                              |
| CG13116                | CG13116   | 0.0  | 1.0                   | 0.0             | -                 | -                                              |
| CG13121                | CG13121   | 0.0  | 2.0                   | -0.2            | -                 | -                                              |
| CG13130                | CG13130   | -2.7 | 0.0                   | 0.0             | -                 | -                                              |
| CG13133                | CG13133   | -0.2 | 0.0                   | -1.9            | -                 | -                                              |
| CG1315                 | CG1315    | 1.1  | -2.3                  | 1.2             | -                 | -                                              |
| CG13168                | CG13168   | 0.8  | 0.0                   | -1.2            | -                 | argininosuccinate metabolic process            |
| CG13278                | CG13278   | 1.1  | 0.0                   | -0.1            | -                 | argininosuccinate synthase activity            |
| CG13333                | CG13333   | 0.0  | -0.1                  | 2.8             | -                 | ASS1 LOC402295                                 |
| CG13386                | CG13386   | 0.0  | -0.1                  | 2.2             | -                 | -                                              |
| CG13404                | CG13404   | 0.6  | -2.2                  | -0.1            | -                 | -                                              |
| CG13437                | CG13437   | 0.0  | 1.6                   | 0.1             | -                 | C9orf46                                        |
| CG13449                | CG13449   | 0.8  | 0.0                   | -0.1            | -                 | -                                              |
| CG13506                | CG13506   | 0.3  | 0.8                   | 1.9             | -                 | -                                              |
| CG13527                | CG13527   | -0.4 | 0.0                   | 2.0             | -                 | -                                              |
| CG13540                | CG13540   | -0.6 | 0.7                   | 0.0             | -                 | proteolysis                                    |
| CG13548                | CG34371   | 1.3  | -0.1                  | 0.0             | -                 | serine-type endopeptidase activity             |
| CG13550                | CG13550   | 0.0  | 0.0                   | -1.8            | -                 | TMPRSS11D TPSAB1 TMPRSS11B                     |
| CG13559                | CG13559   | 1.5  | 1.8                   | 2.6             | -                 | -                                              |
| CG13565                | CG13565   | 0.0  | -0.1                  | -1.7            | -                 | HMCN1 TTN KIRREL2                              |
| CG13576                | CG13576   | -2.5 | 0.0                   | 0.9             | -                 | LITAF                                          |
| CG13597                | CG13597   | 0.0  | 1.3                   | 2.0             | -                 | -                                              |
| CG13627                | CG13627   | 0.0  | 1.9                   | -0.2            | -                 | BRD2 BRD3 BRD4                                 |
| CG13673                | CG13673   | -0.7 | -2.0                  | -3.2            | -                 | -                                              |
| CG13676                | CG13676   | -0.1 | 0.0                   | -1.4            | -                 | -                                              |
| CG13680                | CG34373   | -1.1 | 0.0                   | 0.0             | -                 | -                                              |
| CG13707                | CG13707   | -1.8 | 0.4                   | 0.0             | -                 | chitin metabolic process                       |
| CG13708                | CG13708   | 0.2  | -1.7                  | -0.7            | -                 | chitin binding                                 |
| CG13737                | CG13737   | -1.4 | 0.0                   | 0.0             | -                 | binding                                        |
| CG13829                | CG13829   | 0.0  | -2.3                  | 0.0             | -                 | SARM1*                                         |
| CG13834                | CG34375   | -1.3 | 0.0                   | 0.0             | -                 | -                                              |
| CG13835                | CG34375   | 1.0  | -1.9                  | -0.5            | -                 | -                                              |
| CG13872                | CG13872   | 0.4  | 0.0                   | -2.3            | -                 | -                                              |
| CG13907                | CG13907   | 0.0  | -0.4                  | -1.6            | -                 | -                                              |
| CG13912                | CG13912   | -1.0 | -1.1                  | 0.0             | -                 | secondary active monocarboxylate transmembrane |
| CG13928                | CG13928   | 0.0  | 0.0                   | -1.0            | -                 | SLC16A14 SLC16A12 SLC16A7                      |
| CG13937                | CG13937   | 0.0  | -0.8                  | -1.2            | -                 | -                                              |
| CG13949                | CG13949   | 0.0  | 0.0                   | -2.6            | -                 | protein binding                                |
| CG13964                | CG13964   | 0.0  | 0.0                   | -1.7            | -                 | HNK-1 sulfotransferase activity                |
| CG1397                 | CG1397    | 0.9  | -0.5                  | 0.0             | -                 | CHST11 CHST9 CHST8                             |
| CG13978                | CG13978   | 0.0  | 0.8                   | 1.4             | -                 | -                                              |
| CG1399                 | CG1399    | 0.1  | 1.0                   | 0.0             | -                 | -                                              |
| CG13999                | CG13999   | 0.0  | -2.3                  | 0.0             | -                 | -                                              |
| CG14013                | CG14013   | 0.0  | 2.0                   | 0.0             | -                 | proteolysis                                    |
| CG14015                | CG14015   | 0.0  | -3.0                  | 0.0             | -                 | serine-type peptidase activity                 |
| CG14022                | CG14022   | -1.3 | -0.6                  | -0.1            | -                 | C4orf22                                        |
| CG14033                | CG14033   | 0.0  | 3.3                   | 0.0             | -                 | mannan endo-1,6-alpha-mannosidase activity     |
| CG14098                | CG14098   | 0.6  | 0.5                   | 2.7             | -                 | acylphosphatase activity                       |
| CG14101                | CG14101   | 0.0  | -0.6                  | -0.7            | -                 | -                                              |
| CG14116                | CG34429   | 0.0  | 0.0                   | -2.3            | -                 | -                                              |
| CG14118                | CG14118   | 0.0  | -1.0                  | 0.0             | -                 | endonuclease activity                          |

| <i>D. melanogaster</i> |           |      |      | Fold Change (log2) |                                                | Gene Ontologies                                |                            | <i>H. sapiens</i> |   |
|------------------------|-----------|------|------|--------------------|------------------------------------------------|------------------------------------------------|----------------------------|-------------------|---|
| Gene Name              | CG number | 2h   | 4h   | 10h                | Biological Process                             | Molecular Function                             | Gene Name                  |                   |   |
| CG14120                | CG14120   | 0.0  | -1.5 | 0.0                | metabolic process                              | endonuclease activity                          | -                          | -                 | - |
| CG14129                | CG34420   | 0.0  | 0.0  | 3.2                | proteolysis                                    | dipeptidase activity                           | DPEP1 DPEP2 DPEP3          | -                 | - |
| CG14160                | CG14160   | -1.5 | 0.0  | 0.0                | -                                              | -                                              | -                          | -                 | - |
| CG1421                 | CG1421    | -2.1 | -1.3 | -0.2               | -                                              | -                                              | -                          | -                 | - |
| CG14215                | CG14215   | 0.0  | 0.0  | -1.8               | -                                              | -                                              | AHCTF1                     | -                 | - |
| CG14219                | CG14219   | 0.0  | -1.5 | 0.0                | -                                              | transferase activity, transferring groups oth  | -                          | -                 | - |
| CG14253                | CG14253   | 0.1  | 0.7  | 1.4                | -                                              | -                                              | -                          | -                 | - |
| CG14306                | CG14306   | -0.9 | 0.0  | -0.4               | -                                              | protein binding                                | -                          | -                 | - |
| CG14340                | CG14340   | 0.0  | 0.8  | 3.0                | -                                              | -                                              | -                          | -                 | - |
| CG14351                | CG14351   | -0.2 | -1.5 | -2.4               | -                                              | protein binding                                | CPN2 LGR5 LRIG3            | -                 | - |
| CG14362                | CG14362   | 2.0  | 0.1  | 0.4                | -                                              | calcium ion binding                            | -                          | -                 | - |
| CG14372                | CG14372   | -0.4 | -1.2 | 0.0                | -                                              | -                                              | HMCN1 KIRREL3 IGSF9        | -                 | - |
| CG14394                | CG14394   | -0.4 | 0.0  | 3.3                | tissue regeneration                            | -                                              | -                          | -                 | - |
| CG1440                 | CG1440    | 0.0  | 0.0  | -0.9               | proteolysis                                    | cysteine-type endopeptidase activity           | BLMH                       | -                 | - |
| CG14431                | CG14431   | 0.0  | 0.0  | -2.6               | -                                              | phosphoantethine binding                       | -                          | -                 | - |
| CG14435                | CG14435   | 0.0  | 0.0  | -3.8               | -                                              | protein binding                                | ZNRF2 ZNRF1                | -                 | - |
| CG14442                | CG14442   | 0.0  | 0.0  | -1.6               | transport                                      | transporter activity                           | -                          | -                 | - |
| CG14476                | CG14476   | 0.0  | 0.0  | -1.2               | carbohydrate metabolic process                 | alpha-glucosidase activity                     | GANAB* GANC GAA            | -                 | - |
| CG14487                | CG14487   | -1.6 | -0.2 | -0.4               | -                                              | -                                              | -                          | -                 | - |
| CG14502                | CG14502   | 0.0  | 0.0  | -2.3               | -                                              | -                                              | -                          | -                 | - |
| CG14516                | CG14516   | 0.0  | -0.2 | -3.2               | proteolysis                                    | aminopeptidase activity                        | ANPEP TRHDE ENPEP          | -                 | - |
| CG14526                | CG14526   | -0.4 | 1.0  | 2.4                | proteolysis                                    | metalloendopeptidase activity                  | ECE1 ECE2 ECE1             | -                 | - |
| CG14556                | CG14556   | 2.5  | 0.0  | 0.2                | -                                              | -                                              | -                          | -                 | - |
| CG14565                | CG14565   | 0.0  | -0.3 | -3.1               | -                                              | -                                              | -                          | -                 | - |
| CG14584                | CG14584   | 0.0  | 1.6  | 0.0                | -                                              | -                                              | -                          | -                 | - |
| CG14624                | CG14624   | -0.7 | 0.0  | 0.0                | -                                              | -                                              | -                          | -                 | - |
| CG14632                | CG14632   | 1.1  | 2.8  | 0.0                | -                                              | -                                              | -                          | -                 | - |
| CG14635                | CG14635   | 1.6  | 0.0  | 0.0                | -                                              | -                                              | -                          | -                 | - |
| CG14638                | CG14638   | 0.0  | 0.0  | -2.5               | -                                              | -                                              | -                          | -                 | - |
| CG14642                | CG14642   | 0.0  | 0.0  | -1.4               | proteolysis                                    | serine-type endopeptidase activity             | GZMH                       | -                 | - |
| CG14656                | CG14656   | -1.1 | 0.0  | 2.5                | -                                              | -                                              | TRIP12 HECTD1 WWP2         | -                 | - |
| CG14659                | CG14659   | -2.0 | 0.0  | 0.0                | -                                              | -                                              | -                          | -                 | - |
| CG14668                | CG14668   | 0.0  | 2.3  | -0.1               | -                                              | -                                              | -                          | -                 | - |
| CG14669                | CG14669   | -1.6 | -0.1 | 0.8                | small GTPase mediated signal transduction      | GTP binding                                    | -                          | -                 | - |
| CG14687                | CG14687   | 0.0  | 0.0  | 2.7                | -                                              | myosin light chain binding                     | -                          | -                 | - |
| CG14714                | CG42327   | -0.6 | 0.0  | -1.9               | protein amino acid dephosphorylation           | protein tyrosine phosphatase activity          | PTPN6 PTPN9 PTPRR          | -                 | - |
| CG14755                | CG14755   | -0.7 | 0.2  | 0.0                | -                                              | -                                              | -                          | -                 | - |
| CG14780                | CG14780   | 0.0  | -0.4 | -2.0               | proteolysis                                    | serine-type endopeptidase activity             | PRSS33 serase-1B TMPRSS9   | -                 | - |
| CG14785                | CG14785   | 0.0  | 0.6  | -0.1               | -                                              | -                                              | -                          | -                 | - |
| CG14801                | CG14801   | -0.1 | 0.0  | -2.1               | -                                              | exonuclease activity                           | REXO1 REXO1L1 REXO1L2P     | -                 | - |
| CG14841                | CG14841   | 0.0  | 0.0  | 3.0                | -                                              | -                                              | -                          | -                 | - |
| CG14843                | CG34388   | 0.0  | -1.0 | 0.0                | -                                              | -                                              | -                          | -                 | - |
| CG14846                | CG34389   | 0.4  | 0.0  | 2.4                | Malpighian tubule morphogenesis                | GTPase activator activity                      | STARD13 DLC1 STARD8        | -                 | - |
| CG14869                | CG14869   | 0.5  | 0.2  | 0.0                | proteolysis                                    | metalloendopeptidase activity                  | ADAMTS9* ADAMTS20 ADAMTS15 | -                 | - |
| CG14871                | CG14871   | -1.6 | -0.3 | -2.8               | -                                              | -                                              | -                          | -                 | - |
| CG14872                | CG14872   | 0.0  | 0.2  | 1.1                | transport                                      | transporter activity                           | -                          | -                 | - |
| CG14921                | CG14921   | 0.4  | -0.8 | 0.0                | -                                              | -                                              | -                          | -                 | - |
| CG14947                | CG14947   | 0.0  | -0.1 | -1.4               | -                                              | -                                              | -                          | -                 | - |
| CG14955                | CG14955   | -1.2 | 1.6  | 0.1                | -                                              | -                                              | -                          | -                 | - |
| CG14959                | CG14959   | 0.0  | 0.8  | 0.4                | chitin metabolic process                       | chitin binding                                 | -                          | -                 | - |
| CG14973                | CG42324   | -0.6 | 0.0  | 0.5                | -                                              | -                                              | TJAP1 BEGAIN               | -                 | - |
| CG14982                | CG14982   | 0.0  | 0.0  | -2.2               | -                                              | -                                              | -                          | -                 | - |
| CG14989                | CG14989   | -2.4 | 0.0  | 0.2                | -                                              | -                                              | -                          | -                 | - |
| CG15004                | CG15004   | 0.0  | 1.7  | 0.0                | -                                              | sodium channel auxiliary protein activity      | -                          | -                 | - |
| CG15032                | CG15032   | -0.4 | -1.0 | -0.9               | -                                              | -                                              | -                          | -                 | - |
| CG15040                | CG15040   | 0.0  | 0.2  | 2.8                | -                                              | -                                              | -                          | -                 | - |
| CG15080                | CG15080   | 2.0  | 0.0  | 0.0                | -                                              | -                                              | -                          | -                 | - |
| CG15088                | CG15088   | -1.3 | 0.3  | -0.1               | neurotransmitter transport                     | potassium:amino acid symporter activity        | SLC6A7 SLC6A5 SLC6A9       | -                 | - |
| CG15142                | CG15142   | 0.0  | -0.6 | -2.0               | -                                              | -                                              | -                          | -                 | - |
| CG1516                 | CG1516    | 0.0  | -1.1 | -1.6               | pyruvate metabolic process                     | pyruvate carboxylase activity                  | PC PCCA MCCC1              | -                 | - |
| CG15170                | CG15170   | -0.9 | 0.5  | -0.1               | -                                              | -                                              | -                          | -                 | - |
| CG15198                | CG15198   | 1.1  | 0.0  | -1.2               | -                                              | -                                              | -                          | -                 | - |
| CG15211                | CG15211   | 0.0  | 0.6  | 0.0                | -                                              | -                                              | -                          | -                 | - |
| CG15233                | CG15233   | 0.0  | 0.0  | -2.2               | -                                              | -                                              | -                          | -                 | - |
| CG15240                | CG42541   | 0.0  | -0.9 | 0.4                | small GTPase mediated signal transduction      | GTP binding                                    | -                          | -                 | - |
| CG15260                | CG15260   | 0.0  | -2.7 | 0.3                | -                                              | -                                              | -                          | -                 | - |
| CG15325                | CG15325   | 1.1  | 0.0  | 2.0                | -                                              | -                                              | -                          | -                 | - |
| CG15332                | CG15332   | 0.0  | 0.0  | -1.7               | -                                              | -                                              | -                          | -                 | - |
| CG15390                | CG15390   | 0.0  | 0.0  | 0.7                | -                                              | -                                              | -                          | -                 | - |
| CG15393                | CG15393   | -0.1 | 0.0  | -2.5               | -                                              | -                                              | -                          | -                 | - |
| CG15418                | CG15418   | 1.7  | 0.7  | 0.4                | -                                              | endopeptidase inhibitor activity               | -                          | -                 | - |
| CG15434                | CG15434   | 0.0  | 0.0  | -2.9               | mitochondrial electron transport, NADH to ubiq | NADH dehydrogenase activity                    | NDUFA2                     | -                 | - |
| CG15439                | CG15439   | 0.0  | 0.0  | -1.9               | -                                              | protein binding                                | PHF14                      | -                 | - |
| CG15485                | CG15485   | 0.1  | -0.1 | 2.2                | proteolysis                                    | metalloendopeptidase activity                  | ECE2 ECE1 ECELL1           | -                 | - |
| CG15488                | CG34395   | -2.2 | 0.0  | 0.0                | pattern specification process                  | transcription factor activity                  | POU2F1 POU2F2 POU3F2       | -                 | - |
| CG15497                | CG15497   | 0.4  | -1.5 | 0.0                | -                                              | -                                              | -                          | -                 | - |
| CG15510                | CG15510   | 1.3  | 0.0  | 2.7                | -                                              | -                                              | -                          | -                 | - |
| CG15522                | CG15522   | 0.0  | -0.6 | 0.0                | -                                              | -                                              | -                          | -                 | - |
| CG15594                | CG15594   | 0.0  | -0.1 | 2.8                | -                                              | -                                              | -                          | -                 | - |
| CG15617                | CG15617   | 1.8  | 1.0  | -0.2               | -                                              | protein binding                                | -                          | -                 | - |
| CG15618                | CG15618   | 0.0  | 0.0  | -1.7               | -                                              | -                                              | THADA*                     | -                 | - |
| CG15627                | CG15627   | 0.4  | 0.0  | 1.9                | ion transport                                  | extracellular-glutamate-gated ion channel      | GRIA4 GRIK2 GRIK3          | -                 | - |
| CG15628                | CG15628   | 0.0  | -0.2 | -2.3               | metabolic process                              | N-acetyltransferase activity                   | -                          | -                 | - |
| CG15678                | CG15678   | 0.8  | 0.1  | 0.7                | negative regulation of innate immune response  | -                                              | -                          | -                 | - |
| CG15684                | CG15684   | 0.0  | 1.9  | 0.0                | microtubule-based process                      | GTP binding                                    | -                          | -                 | - |
| CG15708                | CG15708   | 0.1  | 0.0  | -2.3               | -                                              | -                                              | -                          | -                 | - |
| CG1571                 | CG1571    | 0.0  | -2.3 | 0.0                | microtubule-based movement                     | motor activity                                 | DNAI2 WDR63                | -                 | - |
| CG15715                | CG15715   | 0.0  | 0.0  | 0.6                | -                                              | zinc ion binding                               | ZNF706                     | -                 | - |
| CG1572                 | CG1572    | 0.0  | 0.6  | 0.6                | -                                              | -                                              | -                          | -                 | - |
| CG15743                | CG15743   | 0.0  | 0.0  | -2.1               | -                                              | -                                              | -                          | -                 | - |
| CG15747                | CG15747   | 0.0  | -0.8 | 0.1                | -                                              | 3'(2'),5'-bisphosphate nucleotidase activity   | IMPAD1 BPNT1               | -                 | - |
| CG15757                | CG15757   | 1.7  | 0.7  | 0.0                | -                                              | -                                              | -                          | -                 | - |
| CG1582                 | CG1582    | 0.0  | 0.0  | -1.5               | -                                              | structural constituent of chitin-based cuticle | -                          | -                 | - |
| CG15859                | CG15859   | 0.4  | -0.1 | 0.0                | -                                              | helicase activity                              | DHX57* DHX36 DHX29         | -                 | - |
| CG15876                | CG15876   | -2.8 | -3.0 | -0.3               | regulation of localization                     | -                                              | -                          | -                 | - |
| CG15909                | CG15909   | 0.0  | -0.9 | 0.0                | -                                              | -                                              | -                          | -                 | - |
| CG1600                 | CG1600    | -0.2 | 0.0  | -0.6               | metabolic process                              | zinc ion binding                               | -                          | -                 | - |
| CG1620                 | CG1620    | 0.0  | 0.0  | -1.0               | -                                              | DNA binding                                    | MIER1 MIER3 MIER2          | -                 | - |
| CG1628                 | CG1628    | 0.2  | 0.7  | 0.0                | mitochondrial ornithine transport              | L-ornithine transmembrane transporter acti     | SLC25A15 SLC25A2 SLC25A20  | -                 | - |
| CG1648                 | CG1648    | 0.1  | 1.1  | 1.5                | -                                              | -                                              | -                          | -                 | - |
| CG1657                 | CG1657    | 0.0  | 0.0  | -1.9               | phosphoenolpyruvate-dependent suar phospho     | Rab quanyl-nucleotide exchange factor acti     | GAPVD1* RABGEF1            | -                 | - |
| CG16710                | CG16710   | 0.0  | 0.1  | 1.5                | proteolysis                                    | serine-type endopeptidase activity             | TMPPRS3 CTRL F9            | -                 | - |
| CG1677                 | CG1677    | 0.0  | 0.0  | -1.2               | -                                              | zinc ion binding                               | ZC3H18*                    | -                 | - |
| CG16772                | CG16772   | 0.0  | 2.0  | 0.0                | -                                              | -                                              | -                          | -                 | - |
| CG16777                | CG16777   | 0.0  | 0.0  | -2.9               | -                                              | -                                              | -                          | -                 | - |
| CG16800                | CG16800   | 2.1  | -0.8 | -1.6               | -                                              | -                                              | -                          | -                 | - |
| CG16848                | CG16848   | 0.0  | -0.8 | -2.3               | metabolic process                              | FMN adenyltransferase activity                 | FLAD1*                     | -                 | - |
| CG16850                | CG16850   | 0.0  | 1.6  | -0.7               | -                                              | -                                              | -                          | -                 | - |
| CG16863                | CG16863   | 0.0  | 0.0  | -2.0               | -                                              | -                                              | -                          | -                 | - |
| CG16903                | CG16903   | 0.0  | 0.0  | -1.1               | -                                              | cyclin-dependent protein kinase regulator      | ZBED1                      | -                 | - |
| CG16905                | CG16905   | 0.0  | 0.0  | 2.3                | courtship behavior                             | fatty acid elongase activity                   | CCNL2* CCNL1 CCNK          | -                 | - |
| CG16918                | CG16918   | 0.5  | 0.8  | 2.2                | -                                              | -                                              | ELOVL1 ELOVL7 ELOVL4       | -                 | - |
| CG1695                 | CG1695    | -0.7 | 0.0  | 0.0                | regulation of Rab GTPase activity              | Rab GTPase activator activity                  | SGSM1 SGSM2 TBC1D15        | -                 | - |
| CG16956                | CG16956   | 0.0  | -2.8 | 0.1                | -                                              | -                                              | -                          | -                 | - |
| CG16971                | CG16971   | 0.0  | 0.0  | -4.3               | -                                              | -                                              | -                          | -                 | - |
| CG16975                | CG16975   | 0.0  | 0.0  | -1.2               | chromatin silencing                            | methylated histone residue binding             | MBTD1* L3MBTL2 SFBMT2      | -                 | - |

| <i>D. melanogaster</i> |           | Fold Change (log2) |      |      | Gene Ontologies                                   |                                                | <i>H. sapiens</i>             |  |
|------------------------|-----------|--------------------|------|------|---------------------------------------------------|------------------------------------------------|-------------------------------|--|
| Gene Name              | CG number | 2h                 | 4h   | 10h  | Biological Process                                | Molecular Function                             | Gene Name                     |  |
| CG16989                | CG16989   | 0.0                | 0.0  | -2.2 | -                                                 | binding                                        | HEATR6                        |  |
| CG17019                | CG17019   | 0.0                | 0.0  | -1.2 | negative regulation of apoptosis                  | protein binding                                | RFFL* RNF34                   |  |
| CG17027                | CG17027   | 0.0                | 2.3  | 0.0  | dephosphorylation                                 | inositol-1(or 4)-monophosphatase activity      | IMPA1 IMPA2                   |  |
| CG1718                 | CG1718    | 0.0                | 0.0  | -1.6 | -                                                 | ATPase activity, coupled to transmembrane      | ABCA3 ABCA2 ABCA1             |  |
| CG17239                | CG17239   | 0.0                | -1.5 | 0.0  | proteolysis                                       | serine-type endopeptidase activity             | KLK14 PRSS1 KLK13             |  |
| CG17242                | CG17242   | 0.0                | -3.1 | 0.0  | proteolysis                                       | serine-type endopeptidase activity             | TMPRSS4 TMPRSS11D TMPRSS9     |  |
| CG17255                | CG17255   | 0.0                | 0.0  | -2.0 | -                                                 | -                                              | -                             |  |
| CG17258                | CG17258   | -0.1               | -0.7 | -0.1 | -                                                 | -                                              | KIAA1407                      |  |
| CG17273                | CG17273   | 0.0                | 0.1  | -0.5 | purine nucleotide biosynthetic process            | adenylosuccinate synthase activity             | ADSSL1* ADSS                  |  |
| CG17286                | CG17286   | 0.0                | 0.0  | -1.1 | mitotic spindle organization                      | -                                              | -                             |  |
| CG17319                | CG17319   | 0.0                | 2.2  | 0.3  | -                                                 | protein binding                                | -                             |  |
| CG17323                | CG17323   | 0.0                | 2.1  | 0.0  | metabolic process                                 | glucuronosyltransferase activity               | UGT8 UGT2B15 UGT2B17          |  |
| CG17344                | CG17344   | 0.0                | 0.8  | 0.6  | -                                                 | -                                              | -                             |  |
| CG17374                | CG17374   | -0.6               | -0.1 | -1.4 | fatty acid biosynthetic process                   | fatty-acid synthase activity                   | FASN TP5313 OXSM              |  |
| CG17646                | CG17646   | 2.5                | 0.6  | 0.0  | -                                                 | ATPase activity, coupled to transmembrane      | ABCG1 ABCG4 ABCG2             |  |
| CG17660                | CG17660   | 0.4                | 1.1  | 0.5  | -                                                 | -                                              | TMEM87B* TMEM87A              |  |
| CG17681                | CG17681   | -1.1               | 0.4  | 0.0  | metabolic process                                 | N-acetyltransferase activity                   | -                             |  |
| CG17724                | CG17724   | 0.0                | -0.8 | -2.1 | -                                                 | -                                              | -                             |  |
| CG17733                | CG17733   | 0.0                | -0.1 | 2.8  | proteolysis                                       | serine-type endopeptidase activity             | CTRL ACR F11                  |  |
| CG17734                | CG17734   | -0.5               | 0.0  | 0.0  | -                                                 | -                                              | HIGD1C HIGD1A                 |  |
| CG17738                | CG17738   | -0.1               | 0.1  | 2.1  | -                                                 | -                                              | -                             |  |
| CG17760                | CG17760   | 0.1                | 0.2  | 0.7  | G-protein coupled receptor protein signaling patl | GTPase activity                                | GNAQ GNA11 GNA14              |  |
| CG17778                | CG17778   | -1.7               | -0.3 | 0.0  | -                                                 | -                                              | -                             |  |
| CG17781                | CG17781   | 0.0                | 0.0  | 2.0  | -                                                 | -                                              | -                             |  |
| CG17786                | CG17786   | 0.0                | 0.0  | -2.1 | -                                                 | -                                              | -                             |  |
| CG17816                | CG17816   | -0.1               | 0.0  | -3.9 | -                                                 | -                                              | -                             |  |
| CG17834                | CG17834   | -1.0               | 1.0  | 0.0  | -                                                 | -                                              | -                             |  |
| CG17999                | CG17999   | 0.0                | -2.1 | -0.6 | metabolic process                                 | catalytic activity                             | ACSF2 ACSM5 ACSF3             |  |
| CG1806                 | CG1806    | 0.0                | -1.1 | -0.5 | -                                                 | -                                              | -                             |  |
| CG18130                | CG18130   | 0.0                | 0.0  | -2.0 | cell redox homeostasis                            | -                                              | TXNDC6* TXNDC3                |  |
| CG18173                | CG18173   | -2.1               | 0.0  | -1.0 | GPI anchor biosynthetic process                   | transferase activity, transferring acyl group  | PIGW                          |  |
| CG18178                | CG18178   | 0.0                | 0.3  | 1.2  | -                                                 | -                                              | -                             |  |
| CG18258                | CG18258   | -2.9               | 0.0  | 0.0  | lipid metabolic process                           | catalytic activity                             | PNLIPRP1 PNLIP PNLIPRP2       |  |
| CG18327                | CG18327   | 0.0                | 0.0  | -1.8 | transport                                         | transmembrane transporter activity             | SLC25A35 SLC25A34 SLC25A27    |  |
| CG18331                | CG18331   | 0.3                | 0.2  | -2.2 | blood coagulation                                 | -                                              | -                             |  |
| CG18336                | CG18336   | 0.0                | -1.2 | 0.0  | -                                                 | -                                              | -                             |  |
| CG18416                | CG18416   | 0.0                | 0.0  | 2.8  | -                                                 | -                                              | -                             |  |
| CG18418                | CG18418   | -2.3               | 0.0  | 0.0  | alpha-ketoglutarate transport                     | oxoglutarate:malate antiporter activity        | SLC25A11 SLC25A14 UCP3        |  |
| CG18446                | CG18446   | -0.7               | -0.8 | 0.0  | -                                                 | -                                              | -                             |  |
| CG1845                 | CG1845    | 0.0                | 0.0  | -2.2 | -                                                 | zinc ion binding                               | BRPF1 DKFzP547C058 BRD1       |  |
| CG18469                | CG18469   | 0.0                | -1.5 | 0.0  | -                                                 | protein binding                                | -                             |  |
| CG18490                | CG18490   | 0.0                | 0.0  | -2.1 | -                                                 | -                                              | -                             |  |
| CG18522                | CG18522   | 0.0                | 0.0  | -2.2 | -                                                 | iron-sulfur cluster binding                    | XDH AOX1                      |  |
| CG18539                | CG18539   | -2.0               | 0.0  | 0.0  | -                                                 | -                                              | -                             |  |
| CG18557                | CG18557   | 0.2                | 0.8  | 2.3  | proteolysis                                       | serine-type endopeptidase activity             | PRSS22 UNQ9391/PRO34284 PRSS8 |  |
| CG18558                | CG18558   | 0.2                | -1.9 | 0.0  | -                                                 | -                                              | C1GALT1 C1GALT1C1             |  |
| CG18581                | CG18581   | 0.0                | -1.3 | 0.6  | -                                                 | -                                              | -                             |  |
| CG18598                | CG18598   | 0.0                | -1.8 | -0.1 | -                                                 | -                                              | -                             |  |
| CG18692                | CG18692   | 1.3                | 0.3  | 0.0  | -                                                 | -                                              | -                             |  |
| CG18778                | CG18778   | 1.0                | 0.0  | 0.0  | -                                                 | structural constituent of chitin-based cuticle | -                             |  |
| CG18806                | CG18806   | -0.8               | 0.0  | 0.0  | -                                                 | -                                              | -                             |  |
| CG1894                 | CG1894    | -0.1               | -0.9 | -0.5 | regulation of transcription                       | histone acetyltransferase activity             | MYST1 MYST2 MYST3             |  |
| CG1958                 | CG1958    | 0.0                | 0.0  | -2.4 | -                                                 | -                                              | -                             |  |
| CG1973                 | CG1973    | 0.0                | 0.0  | -1.9 | protein amino acid phosphorylation                | protein kinase activity                        | SCYL1* SCYL3 SCYL2            |  |
| CG2017                 | CG2017    | 0.0                | 0.0  | -1.0 | -                                                 | GTP binding                                    | GTPBP2* GTPBP1                |  |
| CG2051                 | CG2051    | -0.7               | -0.2 | 0.3  | histone acetylation                               | histone acetyltransferase activity             | HAT1                          |  |
| CG2112                 | CG2112    | -0.9               | 0.0  | -2.6 | -                                                 | -                                              | WDR22* WDR5 WDR5B             |  |
| CG2120                 | CG2120    | 0.0                | -1.5 | 0.1  | -                                                 | zinc ion binding                               | ZNF227 ZNF234 ZNF71           |  |
| CG2121                 | CG2121    | 0.0                | -2.9 | 2.0  | -                                                 | -                                              | UNC93A                        |  |
| CG2162                 | CG2162    | 0.0                | 0.0  | -1.0 | -                                                 | -                                              | GIDRP88* R3HCC1               |  |
| CG2186                 | CG2186    | 0.0                | 0.0  | -2.4 | -                                                 | -                                              | -                             |  |
| CG2196                 | CG2196    | 0.5                | 1.3  | 0.1  | transport                                         | sodium:iodide symporter activity               | SLCSA12 SLC5A8 SLC5A5         |  |
| CG2218                 | CG2218    | 0.0                | 0.0  | -1.4 | protein ubiquitination                            | protein binding                                | UBOX5                         |  |
| CG2225                 | CG2225    | -0.6               | 0.0  | 0.0  | -                                                 | -                                              | -                             |  |
| CG2444                 | CG2444    | 0.0                | -0.8 | -1.1 | -                                                 | -                                              | -                             |  |
| CG2446                 | CG2446    | 0.0                | 0.0  | -1.0 | -                                                 | -                                              | -                             |  |
| CG2469                 | CG2469    | 0.0                | 0.0  | -0.9 | -                                                 | binding                                        | CTR9                          |  |
| CG25C                  | CG4145    | 0.0                | 0.0  | -2.2 | dorsal closure                                    | extracellular matrix structural constituent    | COL4A6* COL4A2 COL4A1         |  |
| CG2658                 | CG2658    | 0.0                | 0.0  | -1.8 | proteolysis                                       | metallopeptidase activity                      | SPG7* AFG3L2 YME1L1           |  |
| CG2812                 | CG2812    | 0.0                | 0.0  | -1.6 | -                                                 | GTPase activity                                | WDR47* KATNB1 WDR51A          |  |
| CG2930                 | CG2930    | 0.0                | -0.1 | -2.0 | oligopeptide transport                            | proton-dependent oligopeptide secondary z      | SLC15A1 SLC15A2 hPEPT1-RF     |  |
| CG2938                 | CG2938    | 0.0                | 0.0  | -1.6 | -                                                 | -                                              | CASD1                         |  |
| CG2967                 | CG34408   | 0.0                | 0.0  | -2.0 | regulation of small GTPase mediated signal trans  | GTPase activator activity                      | KIAA1219* RPS-1100H13.1       |  |
| CG30002                | CG30002   | 0.0                | 3.2  | 0.0  | proteolysis                                       | serine-type endopeptidase activity             | MASP2 ST14 CTRL               |  |
| CG30027                | CG30027   | 1.6                | 0.2  | 0.1  | -                                                 | -                                              | -                             |  |
| CG30035                | CG30035   | 0.0                | -0.6 | -0.8 | carbohydrate transport                            | glucose transmembrane transporter activity     | SLC2A8 SLC2A6 SLC2A7          |  |
| CG30036                | CG30036   | -0.6               | 1.0  | 0.0  | protein amino acid glycosylation                  | UDP-galactose:beta-N-acetylglucosamine b       | B3GALT1 B3GNT4 B3GNT5         |  |
| CG30090                | CG30090   | 0.0                | 0.0  | -2.6 | proteolysis                                       | serine-type endopeptidase activity             | PROC CTRL CTRB2               |  |
| CG30122                | CG30122   | 0.0                | 0.0  | -1.0 | -                                                 | mRNA binding                                   | HNRNPUL1* HNRNPU HNRNPUL2     |  |
| CG3016                 | CG3016    | 0.0                | 0.0  | -1.1 | ubiquitin-dependent protein catabolic process     | ubiquitin thiolesterase activity               | USP30 USP27X USP22            |  |
| CG30163                | CG30163   | -0.9               | 0.0  | -1.5 | -                                                 | structural constituent of chitin-based cuticle | -                             |  |
| CG30197                | CG30197   | -1.3               | 0.0  | 0.0  | -                                                 | protease inhibitor activity                    | -                             |  |
| CG30282                | CG30282   | 0.0                | 1.4  | 0.4  | -                                                 | -                                              | -                             |  |
| CG3033                 | CG3033    | 0.0                | 0.0  | -1.1 | attachment of GPI anchor to protein               | -                                              | GPA11*                        |  |
| CG30339                | CG30339   | 0.0                | 0.0  | -2.0 | transport                                         | transporter activity                           | TTPAL TTPA RLBP1L2            |  |
| CG30359                | CG30359   | 0.0                | 0.0  | -1.6 | carbohydrate metabolic process                    | cation binding                                 | SLC3A1                        |  |
| CG30377                | CG30377   | -2.1               | -0.9 | -0.1 | -                                                 | -                                              | -                             |  |
| CG30389                | CG30389   | 0.0                | 0.0  | -1.6 | -                                                 | -                                              | TMEM57                        |  |
| CG30429                | CG30429   | -1.4               | -0.2 | -0.1 | -                                                 | -                                              | MORN3* RSPH10B2 RSPH10B       |  |
| CG30456                | CG30456   | 0.0                | -0.9 | 0.0  | regulation of Rho protein signal transduction     | Rho guanlyl-nucleotide exchange factor acti    | -                             |  |
| CG30460                | CG30460   | -0.1               | 1.3  | -1.7 | -                                                 | -                                              | -                             |  |
| CG30495                | CG30495   | -0.1               | 0.1  | -2.1 | metabolic process                                 | oxidoreductase activity                        | RDH13 RDH12 RDH11             |  |
| CG3088                 | CG3088    | 2.4                | 0.0  | 0.0  | translation                                       | serine-type endopeptidase activity             | CTR2B KLK81 F11               |  |
| CG3099                 | CG3099    | 0.0                | 0.0  | -1.9 | protein modification process                      | ubiquitin-protein ligase activity              | HECW2* HECW1 NEDL1            |  |
| CG31012                | CG31012   | 0.0                | 1.5  | 0.0  | -                                                 | SH3/SH2 adaptor activity                       | SH3KBP1* CD2AP ITSN1          |  |
| CG31052                | GA15967   | 0.0                | -0.7 | -0.2 | cation transport                                  | solute:hydrogen antiporter activity            | NHEDC2 NHEDC1                 |  |
| CG31064                | CG31064   | 0.0                | 0.0  | -2.8 | phagocytosis, engulfment                          | zinc ion binding                               | RUFY3 RUFY2 RUFY1             |  |
| CG31077                | CG31077   | -1.8               | 0.0  | 0.4  | chitin metabolic process                          | chitin binding                                 | -                             |  |
| CG31079                | CG31079   | -0.3               | 0.0  | -1.4 | -                                                 | -                                              | -                             |  |
| CG31116                | CG31116   | -0.2               | -0.3 | -1.5 | chloride transport                                | chloride channel activity                      | CLCN2* CLCN1 CLCNKA           |  |
| CG31121                | CG31121   | 0.0                | 1.7  | 0.0  | transport                                         | ATPase activity, coupled to transmembrane      | ABCG8 ABCG5 ABCG1             |  |
| CG31150                | CG31150   | 0.0                | 0.0  | -1.3 | lipid transport                                   | lipid transporter activity                     | -                             |  |
| CG31151                | CG31151   | 0.0                | 0.1  | -2.0 | -                                                 | DNA binding                                    | BAHCC1 TNRC18 TNRC18C         |  |
| CG31158                | CG31158   | 0.7                | 0.7  | 0.0  | regulation of ARF protein signal transduction     | ARF guanlyl-nucleotide exchange factor acti    | PSD3 PSD PSD2                 |  |
| CG31163                | CG31163   | -2.0               | -2.1 | 0.1  | -                                                 | SH3/SH2 adaptor activity                       | SASH3 SASH1 SAMD5             |  |
| CG31169                | CG31169   | 0.0                | 0.0  | -2.4 | glycerol-3-phosphate metabolic process            | glycerol-3-phosphate dehydrogenase (NAD        | GPD1 GPD1L                    |  |
| CG31209                | CG34139   | 2.7                | -1.1 | 0.1  | -                                                 | carboxylesterase activity                      | -                             |  |
| CG31217                | CG31217   | 0.6                | 0.1  | 0.0  | proteolysis                                       | serine-type endopeptidase activity             | VLDLR LRP2 LRP1B              |  |
| CG31272                | CG31272   | -0.4               | -0.7 | 0.0  | transport                                         | transporter activity                           | SV2B SV2C SV2A                |  |
| CG31285                | CG42250   | 0.0                | 0.0  | -3.1 | neurotransmitter secretion                        | -                                              | CLINT1 EPN2 EPN3              |  |
| CG31288                | CG31288   | 0.0                | 0.0  | 2.2  | -                                                 | -                                              | -                             |  |
| CG31303                | CG42542   | -0.6               | 0.0  | -0.7 | -                                                 | -                                              | -                             |  |
| CG31347                | CG31347   | -2.2               | 0.8  | 0.1  | -                                                 | -                                              | -                             |  |
| CG31355                | CG31355   | 0.0                | -1.2 | -3.2 | -                                                 | -                                              | -                             |  |
| CG31418                | CG31418   | 0.1                | 0.0  | 2.9  | -                                                 | -                                              | -                             |  |
| CG31446                | CG31446   | 0.6                | -1.2 | -2.7 | -                                                 | binding                                        | -                             |  |

| <i>D. melanogaster</i> |           |      |      | Fold Change (log2) | Gene Ontologies                                   |                                              | <i>H. sapiens</i>          |
|------------------------|-----------|------|------|--------------------|---------------------------------------------------|----------------------------------------------|----------------------------|
| Gene Name              | CG number | 2h   | 4h   | 10h                | Biological Process                                | Molecular Function                           | Gene Name                  |
| CG31459                | CG31459   | 0.0  | 0.0  | 3.0                | -                                                 | -                                            | -                          |
| CG31469                | CG31469   | 0.0  | -0.7 | 0.0                | protein amino acid dephosphorylation              | protein tyrosine phosphatase activity        | ACP1                       |
| CG31475                | CG31475   | 0.0  | -0.5 | 2.8                | -                                                 | calcium ion binding                          | SDF4* CALU RCN2            |
| CG31533                | CG31533   | 0.0  | -2.4 | 0.0                | -                                                 | -                                            | -                          |
| CG31555                | CG31555   | 0.7  | -0.4 | -0.1               | -                                                 | -                                            | -                          |
| CG31606                | CG31606   | 0.2  | -1.7 | 0.0                | -                                                 | -                                            | -                          |
| CG31661                | CG31661   | -2.0 | 0.0  | 0.7                | proteolysis                                       | aspartic-type endopeptidase activity         | PGA3 PGA5 CTSD             |
| CG3168                 | CG3168    | 0.0  | -0.6 | -1.4               | DNA topological change                            | transporter activity                         | SV2C SV2B SV2A             |
| CG31681                | CG31681   | -1.7 | 0.0  | 0.0                | proteolysis                                       | serine-type endopeptidase activity           | TMRSS4 TMRSS9 serase-1B    |
| CG31688                | CG31688   | 0.0  | 0.0  | -1.8               | -                                                 | -                                            | -                          |
| CG31703                | CG31703   | 0.1  | 0.7  | -2.1               | transcription initiation                          | DNA binding                                  | RTF1                       |
| CG3173                 | CG3173    | 0.0  | 0.0  | -1.8               | -                                                 | binding                                      | INTS1 DKFZP586J0619 INT1   |
| CG31769                | CG31769   | -1.0 | 0.0  | -2.0               | -                                                 | -                                            | -                          |
| CG31772                | CG31772   | 0.0  | -2.0 | 0.0                | -                                                 | protein binding                              | -                          |
| CG31792                | CG31792   | 0.1  | 0.1  | -2.7               | transport                                         | ATPase activity, coupled to transmembrane    | ABCC4* ABCC3* ABCC1* ABCC2 |
| CG31801                | CG31801   | -1.6 | -0.1 | 1.4                | -                                                 | -                                            | -                          |
| CG31820                | CG31820   | 0.0  | -1.5 | 0.0                | -                                                 | -                                            | -                          |
| CG31859                | CG31859   | -1.6 | 0.0  | -0.5               | -                                                 | -                                            | -                          |
| CG31860                | CG31860   | 0.0  | 0.1  | 1.9                | zinc ion transport                                | zinc ion transmembrane transporter activity  | SLC30A2 SLC30A3 SLC30A8    |
| CG31867                | CG31867   | 0.0  | -0.2 | 1.4                | -                                                 | -                                            | -                          |
| CG31871                | CG31871   | 0.4  | 0.0  | 1.3                | lipid metabolic process                           | triacylglycerol lipase activity              | LIPA LIPM LIPK             |
| CG31918                | CG31918   | 0.2  | 0.7  | 0.1                | proteolysis                                       | metalloendopeptidase activity                | -                          |
| CG31988                | CG31988   | 0.0  | 0.0  | 2.3                | -                                                 | zinc ion binding                             | TGFB11 PXN LPXN            |
| CG31989                | CG31989   | 0.0  | -1.1 | -1.1               | chromosome organization                           | binding                                      | -                          |
| CG31992                | CG31992   | 0.0  | 0.0  | -1.0               | nuclear-transcribed mRNA catabolic process, nor   | nucleic acid binding                         | -                          |
| CG31997                | CG31997   | -1.3 | 0.0  | 0.0                | -                                                 | -                                            | -                          |
| CG32021                | CG32021   | -0.7 | 0.0  | -0.7               | -                                                 | -                                            | -                          |
| CG32023                | CG32023   | -0.6 | 0.0  | 3.9                | -                                                 | -                                            | -                          |
| CG32046                | CG42268   | 0.7  | -1.3 | -0.1               | -                                                 | -                                            | -                          |
| CG32048                | CG32048   | -0.5 | -0.9 | -0.4               | -                                                 | -                                            | -                          |
| CG32052                | CG32052   | 0.0  | -3.1 | 0.0                | -                                                 | sphingomyelin phosphodiesterase activity     | NOS1AP                     |
| CG32066                | CG32066   | 0.0  | 0.0  | -0.9               | -                                                 | -                                            | SMPDL3B* SMPDL3A SMPD1     |
| CG32107                | CG32107   | -0.9 | 0.0  | -0.1               | -                                                 | -                                            | FAM49B FAM49A BM009        |
| CG32110                | CG32110   | -0.8 | -1.2 | 0.0                | proteolysis                                       | peptidase activity                           | SEN1 SENP3 SENP5           |
| CG32117                | CG32117   | 0.0  | 0.0  | -2.3               | -                                                 | -                                            | -                          |
| CG32143                | CG42280   | 0.0  | 0.0  | -2.1               | proteolysis                                       | dipeptidyl-peptidase activity                | FAP* DPP4 DPP10            |
| CG3216                 | CG3216    | 0.0  | 0.0  | -2.6               | G-protein coupled receptor protein signaling path | guanylate cyclase activity                   | NPR2* NPR1 GUCY2F          |
| CG32185                | CG32185   | 0.0  | -0.7 | 0.0                | -                                                 | -                                            | -                          |
| CG32187                | CG32187   | -0.5 | 0.0  | -2.2               | -                                                 | -                                            | -                          |
| CG32203                | CG32203   | 0.0  | -2.4 | 0.0                | -                                                 | -                                            | -                          |
| CG32204                | CG32204   | -1.4 | 0.0  | 0.1                | -                                                 | serine-type endopeptidase inhibitor activity | SERPINB1 SERPINB9 SERPINI1 |
| CG32219                | CG32219   | 0.0  | 2.9  | 0.0                | -                                                 | -                                            | -                          |
| CG32226                | CG32226   | 0.0  | 0.1  | -2.2               | -                                                 | sugar binding                                | TECPR1*                    |
| CG32232                | CG32232   | 0.3  | 0.0  | 1.8                | microtubule cytoskeleton organization             | -                                            | -                          |
| CG32263                | CG32263   | 0.0  | 2.4  | 0.3                | -                                                 | -                                            | MPV17L2                    |
| CG32284                | CG32284   | -0.4 | 0.0  | -0.1               | chitin metabolic process                          | chitin binding                               | -                          |
| CG32306                | CG32306   | -0.1 | -0.1 | -1.6               | -                                                 | -                                            | -                          |
| CG32319                | CG32319   | 0.0  | -0.1 | -2.1               | protein amino acid acetylation                    | N-acetyltransferase activity                 | NAT12                      |
| CG32374                | CG32374   | 2.5  | 0.2  | 1.0                | proteolysis                                       | serine-type endopeptidase activity           | TMRSS2 PRSS1 KLK7          |
| CG32387                | CG42956   | 0.0  | -0.1 | -3.1               | homophilic cell adhesion                          | -                                            | DSCAM1* DSCAML1* HMCN1     |
| CG32431                | CG32431   | 0.0  | 2.4  | 0.0                | -                                                 | -                                            | -                          |
| CG32437                | CG32437   | -1.2 | 0.0  | -0.1               | -                                                 | -                                            | -                          |
| CG32463                | CG32463   | 0.0  | 2.2  | 0.0                | -                                                 | endodeoxyribonuclease activity               | ENDOG ENDOGL1              |
| CG32506                | CG32506   | -2.1 | -2.1 | -1.7               | regulation of Rab GTPase activity                 | Rab GTPase activator activity                | SGSM1* SGSM2 TBC1D15       |
| CG3251                 | CG3251    | 0.0  | -0.1 | 2.3                | -                                                 | -                                            | ALG13 OTUD4 HIN1L          |
| CG32533                | CG32533   | 0.0  | 0.0  | -2.0               | nuclear mRNA splicing, via spliceosome            | helicase activity                            | DHX8 DHX33 DHX16           |
| CG32542                | CG34401   | 0.0  | 0.0  | -1.8               | -                                                 | zinc ion binding                             | KIAA0913* ZSWIM4 ZSWIM6    |
| CG32544                | CG32544   | 0.0  | 0.0  | -2.1               | -                                                 | -                                            | -                          |
| CG32564                | CG32564   | 1.1  | 0.1  | 0.2                | -                                                 | -                                            | -                          |
| CG32570                | CG32570   | 0.0  | -1.1 | 0.0                | -                                                 | -                                            | -                          |
| CG3259                 | CG3259    | -2.2 | 0.0  | -1.9               | cilium biogenesis                                 | -                                            | TRAF3IP1*                  |
| CG32603                | CG32603   | -0.1 | 2.5  | 0.1                | -                                                 | -                                            | -                          |
| CG32613                | CG32613   | -0.6 | 0.0  | 0.0                | -                                                 | -                                            | -                          |
| CG32647                | CG32647   | 0.7  | -0.1 | 0.0                | methylation                                       | methyltransferase activity                   | -                          |
| CG32651                | CG32651   | 0.0  | 0.0  | -2.2               | -                                                 | -                                            | -                          |
| CG32663                | CG32663   | 0.0  | 0.0  | -2.1               | -                                                 | -                                            | BCAS3* MAAB2               |
| CG32670                | CG32670   | 1.9  | 0.5  | 0.0                | small GTPase mediated signal transduction         | GTPase activity                              | RAB1A RAB1B RAB8B          |
| CG32675                | CG32675   | 0.0  | 0.0  | -1.7               | Golgi organization                                | -                                            | TMEM49                     |
| CG3270                 | CG3270    | -2.0 | 0.9  | 0.3                | -                                                 | oxidoreductase activity                      | FOXRED1*                   |
| CG32702                | CG32702   | 0.0  | 0.0  | -2.1               | -                                                 | calcium ion binding                          | CUBN TLL1 BMP1             |
| CG32705                | CG34450   | 0.0  | -1.1 | -1.6               | -                                                 | -                                            | -                          |
| CG32792                | CG32792   | 0.0  | -2.0 | 0.3                | sodium ion transport                              | sodium channel activity                      | -                          |
| CG32816                | CG32816   | 2.5  | 0.0  | 0.1                | -                                                 | -                                            | -                          |
| CG32833                | CG32833   | -0.1 | 0.0  | 1.5                | proteolysis                                       | serine-type endopeptidase activity           | KLK5 KLK8 KLKB1            |
| CG32834                | CG32834   | 0.0  | 2.5  | 0.0                | proteolysis                                       | serine-type peptidase activity               | KLK6 PRSS1 PRSS3           |
| CG32835                | CG32835   | 0.0  | 1.6  | 0.7                | -                                                 | -                                            | -                          |
| CG32850                | CG32850   | -0.8 | 0.0  | 0.0                | -                                                 | -                                            | -                          |
| CG32972                | CG32972   | 0.0  | -1.9 | 0.0                | -                                                 | protein binding                              | RNF11                      |
| CG32973                | CG32973   | 1.1  | 0.0  | 0.1                | -                                                 | -                                            | TGFB1                      |
| CG32982                | CG32982   | 0.0  | 1.8  | -0.7               | -                                                 | -                                            | -                          |
| CG33087                | CG33087   | 0.0  | -2.3 | -2.3               | -                                                 | -                                            | -                          |
| CG33099                | CG33099   | 0.0  | 0.2  | 1.1                | -                                                 | low-density lipoprotein receptor activity    | LRP1 LRP1B LRP2            |
| CG33137                | CG33137   | 0.0  | 0.0  | -1.7               | gibberellin 20-oxidase activity                   | -                                            | -                          |
| CG33143                | CG33143   | 0.2  | 1.3  | 0.0                | -                                                 | -                                            | -                          |
| CG33144                | CG33144   | -0.2 | 0.1  | -3.1               | -                                                 | protein binding                              | RNF144A RNF144B RNF14      |
| CG33171                | CG42543   | 0.0  | 0.0  | -2.9               | cell adhesion                                     | binding                                      | COL15A1 COL18A1            |
| CG33203                | CG33203   | 0.3  | 0.7  | 2.6                | -                                                 | -                                            | PAQR4* ADIPOR1 ADIPOR2     |
| CG33217                | CG33217   | 0.0  | 0.0  | 0.8                | -                                                 | -                                            | -                          |
| CG33218                | CG33218   | 0.0  | -0.9 | 0.0                | -                                                 | -                                            | -                          |
| CG33249                | CG42271   | 0.0  | 0.0  | -2.2               | phosphoinositide dephosphorylation                | phosphatidylinositol-3,4-bisphosphate 4-ph   | -                          |
| CG33253                | CG33253   | 0.9  | 2.3  | 0.0                | phagocytosis, engulfment                          | -                                            | STOM STOML3 NPHS2          |
| CG33268                | CG33268   | -1.5 | 0.1  | -2.1               | -                                                 | -                                            | -                          |
| CG33281                | CG33281   | -0.1 | 2.4  | 0.0                | monosaccharide transport                          | monosaccharide transmembrane transport       | SLC2A8 SLC2A6 SLC2A2       |
| CG33300                | CG33300   | 0.0  | -1.0 | -0.4               | -                                                 | -                                            | -                          |
| CG33309                | CG33309   | 0.0  | 0.0  | 2.2                | -                                                 | -                                            | -                          |
| CG33324                | CG33324   | 0.0  | 0.4  | -2.2               | -                                                 | -                                            | -                          |
| CG33337                | CG33337   | 1.9  | 0.1  | 0.0                | -                                                 | acyltransferase activity                     | -                          |
| CG3339                 | CG3339    | 0.2  | 0.2  | 2.3                | microtubule-based movement                        | motor activity                               | DNAH9* DNAH17* DNAH10*     |
| CG3345                 | CG3345    | 0.0  | 0.0  | -2.4               | -                                                 | -                                            | -                          |
| CG33459                | CG33459   | 0.5  | 1.8  | 3.4                | proteolysis                                       | serine-type endopeptidase activity           | ESSLP CTRL F2              |
| CG33470                | CG33470   | -1.3 | -2.1 | 0.0                | -                                                 | -                                            | -                          |
| CG33474                | CG33474   | -0.9 | 0.0  | 0.0                | peroxisome fission                                | -                                            | -                          |
| CG33493                | CG33493   | 0.0  | 0.5  | -2.6               | -                                                 | -                                            | -                          |
| CG33528                | CG33528   | 0.0  | -0.5 | 2.4                | dopamine transport                                | monoamine transmembrane transporter ac       | SLC18A2 SLC18A1 SLC18A3    |
| CG33557                | CG33557   | -2.6 | 0.2  | -1.4               | regulation of transcription                       | transcription factor activity                | TCF15 SCXA                 |
| CG33631                | CG33631   | 1.8  | -1.9 | 1.2                | -                                                 | -                                            | -                          |
| CG33639                | CG33639   | 1.6  | 0.0  | 0.0                | G-protein coupled receptor protein signaling path | neuropeptide receptor activity               | -                          |
| CG3367                 | CG42340   | -1.0 | 0.0  | 0.1                | potassium ion transport                           | potassium channel activity                   | KCNK10                     |
| CG3368                 | CG3368    | 0.0  | 0.0  | -1.2               | -                                                 | binding                                      | -                          |
| CG33690                | CG33690   | 0.0  | -0.9 | 0.0                | -                                                 | -                                            | -                          |
| CG33703                | CG33703   | 0.0  | 0.0  | -2.7               | -                                                 | -                                            | -                          |
| CG33966                | CG33966   | 0.0  | 0.9  | -2.2               | -                                                 | vitamin E binding                            | TTPAL TTPA RLBPL2          |
| CG33967                | CG33967   | 0.0  | 0.0  | -2.3               | -                                                 | protein binding                              | WWC1* WWC2 WWC3            |
| CG33970                | CG33970   | 0.0  | -0.9 | -0.1               | transport                                         | ATPase activity, coupled to transmembrane    | ABCA3 ABCA5 ABCA12         |
| CG33978                | CG33978   | 0.0  | -2.2 | -0.1               | -                                                 | -                                            | -                          |
| CG33980                | CG33980   | 0.0  | 0.0  | 1.7                | regulation of transcription, DNA-dependent        | sequence-specific DNA binding                | VSX2 VSX1 ALX4             |

| <i>D. melanogaster</i> |           | Fold Change (log2) |      |      | Gene Ontologies                               |                                             | <i>H. sapiens</i>                  |  |
|------------------------|-----------|--------------------|------|------|-----------------------------------------------|---------------------------------------------|------------------------------------|--|
| Gene Name              | CG number | 2h                 | 4h   | 10h  | Biological Process                            | Molecular Function                          | Gene Name                          |  |
| CG34006                | CG34006   | -2.6               | -1.4 | -0.3 | -                                             | -                                           | -                                  |  |
| CG34007                | CG34007   | 0.0                | -1.5 | 2.8  | -                                             | -                                           | -                                  |  |
| CG34010                | CG34010   | 0.4                | -0.1 | 0.2  | -                                             | -                                           | -                                  |  |
| CG34012                | CG34012   | -2.0               | 0.0  | 0.0  | -                                             | -                                           | -                                  |  |
| CG34017                | CG34017   | 0.0                | 0.6  | 0.1  | -                                             | -                                           | -                                  |  |
| CG34051                | CG34051   | -0.1               | 0.2  | 2.0  | -                                             | -                                           | -                                  |  |
| CG3409                 | CG3409    | 0.0                | -0.6 | 0.0  | -                                             | monocarboxylic acid transmembrane trans     | SLC16A14 SLC16A9 SLC16A12          |  |
| CG3523                 | CG3523    | 0.0                | 0.2  | -1.5 | oxidation reduction                           | fatty-acid synthase activity                | FASN TP5313 CRY2                   |  |
| CG3573                 | CG3573    | 0.0                | 0.0  | -1.7 | dephosphorylation                             | inositol-polyphosphate 5-phosphatase activ  | INPP5B* OCRL SYNJ1                 |  |
| CG3585                 | CG3585    | 0.0                | -0.2 | -2.7 | open tracheal system development              | GTP binding                                 | DMXL2 DMXL1                        |  |
| CG3744                 | CG3744    | 0.0                | 0.0  | -1.5 | proteolysis                                   | dipeptidyl-peptidase activity               | DP99* DPP8 DPP4                    |  |
| CG3754                 | CG42276   | 0.0                | 0.0  | -2.5 | microtubule-based process                     | 3',5'-cyclic-GMP phosphodiesterase activity | PDE9A* PDE4D PDE4C                 |  |
| CG3764                 | CG3764    | 0.0                | -0.3 | -2.2 | -                                             | -                                           | FNIP2* FNIP1                       |  |
| CG3770                 | CG3770    | -0.2               | -0.1 | -1.1 | establishment or maintenance of cell polarity | -                                           | -                                  |  |
| CG3805                 | CG34126   | -0.3               | -0.2 | -1.5 | -                                             | nucleotide binding                          | UHRF1BP11* UHRF1BP1 DKFZp686F10110 |  |
| CG3810                 | CG3810    | 0.0                | -0.1 | -2.2 | ER-associated protein catabolic process       | mannosyl-oligosaccharide 1,2-alpha-mann     | EDEM2* EDEM1 EDEM3                 |  |
| CG3829                 | CG3829    | 0.7                | 1.4  | 0.1  | defense response                              | scavenger receptor activity                 | SCARB1 SCARB2 CD36                 |  |
| CG3842                 | CG3842    | -0.2               | 0.0  | 2.8  | metabolic process                             | oxidoreductase activity, actinq on CH-OH q  | RDH12 RDH14 RDH11                  |  |
| CG3875                 | CG3875    | 0.1                | 0.3  | -2.9 | ubiquinone biosynthetic process               | RNA binding                                 | KHDRBS3 KHDRBS2 KHDRBS1            |  |
| CG3884                 | CG3884    | 0.1                | 1.1  | 3.9  | -                                             | -                                           | -                                  |  |
| CG3994                 | CG3994    | 2.8                | 1.6  | 0.0  | response to zinc ion                          | metal ion transmembrane transporter activ   | SLC30A3 SLC30A2 SLC30A8            |  |
| CG40050                | CG40050   | 0.0                | -1.0 | 0.0  | metamorphosis                                 | 2 iron, 2 sulfur cluster binding            | -                                  |  |
| CG40067                | CG41520   | -0.1               | -1.0 | 0.0  | signal transduction                           | receptor binding                            | ANGPT4 ANGPT2 FGL1                 |  |
| CG40169                | CG40169   | 0.0                | -1.7 | 0.0  | -                                             | -                                           | -                                  |  |
| CG40172                | CG40172   | 0.0                | 0.0  | 2.5  | -                                             | -                                           | -                                  |  |
| CG40176                | CG40176   | 0.0                | 2.3  | 0.0  | -                                             | -                                           | -                                  |  |
| CG40204                | CG40204   | 2.5                | 0.0  | 0.0  | signal transduction                           | -                                           | -                                  |  |
| CG40290                | CG40290   | -0.8               | 0.0  | 0.0  | -                                             | -                                           | -                                  |  |
| CG40339                | CG40339   | 1.3                | -0.3 | 0.0  | -                                             | -                                           | -                                  |  |
| CG40380                | CG40380   | 0.1                | 0.5  | 0.0  | -                                             | -                                           | -                                  |  |
| CG40484                | CG40484   | 0.0                | 0.0  | 2.3  | -                                             | heat shock protein binding                  | -                                  |  |
| CG40498                | CG40498   | -1.2               | -0.1 | 0.0  | -                                             | -                                           | -                                  |  |
| CG4066                 | CG4066    | 1.8                | 0.0  | -3.7 | -                                             | -                                           | -                                  |  |
| CG4080                 | CG4080    | 0.7                | 1.1  | 0.0  | -                                             | protein binding                             | MARCH8 MARCH2 MARCH1               |  |
| CG4096                 | CG4096    | 0.0                | 0.0  | -2.7 | proteolysis                                   | metalloendopeptidase activity               | ADAMTS12* ADAMTS7 ADAMTS6          |  |
| CG4199                 | CG4199    | 0.0                | 0.0  | -1.0 | oxidation reduction                           | 2 iron, 2 sulfur cluster binding            | AIFM3*                             |  |
| CG4301                 | CG4301    | 0.0                | 0.0  | -1.9 | phospholipid transport                        | calcium-transporting ATPase activity        | ATP10D ATP10A ATP11B               |  |
| CG4318                 | CG4318    | 0.0                | -0.5 | 2.3  | -                                             | zinc ion binding                            | ZNF600 ZNF658B ZNF708              |  |
| CG4372                 | CG4372    | 0.0                | -0.8 | 2.7  | -                                             | N4-(beta-N-acetylglucosaminyl)-L-asparagi   | AGA ASRGL1                         |  |
| CG4389                 | CG4389    | 0.0                | 0.3  | -0.5 | fatty acid beta-oxidation                     | long-chain-3-hydroxyacyl-CoA dehydrogen     | HADHA EHHADH HADH                  |  |
| CG4538                 | CG4538    | 0.0                | 0.0  | -1.3 | ATP-dependent proteolysis                     | serine-type endopeptidase activity          | CLPX                               |  |
| CG4562                 | CG4562    | 0.0                | -0.7 | -2.6 | transport                                     | ATPase activity, coupled to transmembrane   | ABCC4* ABCC1 ABCC3                 |  |
| CG4631                 | CG4631    | 0.0                | 0.2  | -2.1 | -                                             | -                                           | -                                  |  |
| CG4660                 | CG4660    | 0.0                | -2.6 | -0.4 | -                                             | -                                           | Cborf55                            |  |
| CG4751                 | CG4751    | 0.0                | 0.0  | -1.3 | -                                             | -                                           | MPND MYSM1                         |  |
| CG4781                 | CG4781    | 0.0                | -2.4 | 0.0  | -                                             | protein binding                             | CHADL LRRCA LRRN2                  |  |
| CG4793                 | CG4793    | 0.7                | 1.6  | 3.7  | carbohydrate metabolic process                | serine-type endopeptidase activity          | TPRPS513 KLKB1 CTRB2               |  |
| CG4797                 | CG4797    | 0.0                | 0.0  | -2.8 | transport                                     | glucose transmembrane transporter activi    | SLC2A6 SLC2A8 SLC2A7               |  |
| CG4804                 | CG4804    | 1.1                | 2.0  | 1.8  | -                                             | serine-type endopeptidase inhibitor activi  | PAI-2 SERPIN11 SERPINB8            |  |
| CG4814                 | CG4814    | 0.4                | -0.5 | -1.7 | -                                             | -                                           | HNT NTM OPCNL                      |  |
| CG4822                 | CG4822    | 0.9                | 1.3  | 0.5  | -                                             | ATPase activity, coupled to transmembrane   | ABCG4 ABCG1 ABCG2                  |  |
| CG4827                 | CG4827    | 0.0                | -1.3 | -0.8 | nucleotide catabolic process                  | 5'-nucleotidase activity                    | NTSE                               |  |
| CG4842                 | CG4842    | 0.0                | -0.8 | 0.0  | metabolic process                             | alcohol dehydrogenase activity              | HPGD CBR4 DHRS11                   |  |
| CG4983                 | CG4983    | -3.1               | -0.1 | 0.0  | -                                             | -                                           | -                                  |  |
| CG5011                 | CG5011    | 0.0                | -0.3 | 2.1  | -                                             | -                                           | -                                  |  |
| CG5022                 | CG5022    | 0.0                | -2.3 | 0.0  | -                                             | cytoskeletal protein binding                | FRMD5 FRMD3 EPB41                  |  |
| CG5030                 | CG34139   | 2.2                | -0.4 | 0.0  | -                                             | carboxylesterase activity                   | -                                  |  |
| CG5065                 | CG5065    | 1.5                | -1.6 | 0.0  | metabolic process                             | catalytic activity                          | FAR1 FAR2                          |  |
| CG5115                 | CG5115    | 0.0                | -1.4 | 0.5  | -                                             | -                                           | -                                  |  |
| CG5191                 | CG5191    | 0.0                | 0.0  | -2.3 | -                                             | glutaminyl-tRNA synthase (glutamine-hydr    | FAAH2                              |  |
| CG5197                 | CG34458   | 0.0                | -1.4 | 0.0  | -                                             | -                                           | serase-1B TMRPSS9 TMRPSS11E        |  |
| CG5205                 | CG5205    | 0.0                | 0.0  | -1.2 | nuclear mRNA splicing, via spliceosome        | helicase activity                           | SNRNP200* ASCC3 HFM1               |  |
| CG5246                 | CG5246    | 0.3                | 1.2  | 1.2  | proteolysis                                   | serine-type endopeptidase activity          | ZFYVE26*                           |  |
| CG5270                 | CG5270    | 0.0                | 0.0  | -2.3 | -                                             | zinc ion binding                            | -                                  |  |
| CG5388                 | CG5388    | 0.0                | 0.0  | -3.1 | -                                             | -                                           | -                                  |  |
| CG5392                 | CG5392    | 0.1                | 0.5  | 0.2  | -                                             | serine-type endopeptidase inhibitor activi  | RECK                               |  |
| CG5418                 | CG5418    | 0.0                | -2.9 | -0.5 | -                                             | -                                           | -                                  |  |
| CG5431                 | CG5431    | -1.0               | 0.0  | 0.0  | -                                             | tyrosine-ester sulfotransferase activity    | SULT1A3 ST1A5 SULT1C3              |  |
| CG5480                 | CG5480    | 1.9                | 0.0  | 0.0  | -                                             | -                                           | -                                  |  |
| CG5508                 | CG5508    | 0.0                | 0.0  | -1.1 | phospholipid biosynthetic process             | glycerol-3-phosphate O-acyltransferase act  | GPAM RPI1-426E5.2 GNPAT            |  |
| CG5550                 | CG5550    | 0.0                | 0.0  | 0.0  | signal transduction                           | receptor binding                            | TNC TNR ANGPTL6                    |  |
| CG5561                 | CG5561    | 0.0                | -1.6 | 0.0  | methylation                                   | methyltransferase activity                  | HDHD1A                             |  |
| CG5566                 | CG34353   | 0.0                | 0.0  | 2.4  | -                                             | -                                           | NEGR1 NTM DKFZp686H1949            |  |
| CG5577                 | CG5577    | 0.7                | 0.0  | 0.0  | metabolic process                             | 4-nitrophenylphosphatase activity           | PGP PDXP HDHD2                     |  |
| CG5591                 | CG5591    | 0.0                | 0.0  | -2.1 | phagocytosis, engulfment                      | transcription regulator activity            | MLL2 MLL3                          |  |
| CG5794                 | CG5794    | 0.0                | 0.0  | -2.3 | ubiquitin-dependent protein catabolic process | ubiquitin thiolesterase activity            | USP34* USP24 USP9Y                 |  |
| CG5850                 | CG5850    | 0.0                | 0.0  | -0.9 | -                                             | -                                           | TMEM184C TMEM184A TMEM184B         |  |
| CG5866                 | CG5866    | 2.2                | 0.0  | 1.3  | -                                             | -                                           | -                                  |  |
| CG5928                 | CG5928    | 0.0                | -1.0 | -2.2 | -                                             | -                                           | -                                  |  |
| CG5932                 | CG5932    | 1.0                | -0.1 | 0.0  | lipid metabolic process                       | triacylglycerol lipase activity             | LIPA LIPN LIPM                     |  |
| CG5945                 | CG5945    | 1.0                | 0.0  | 0.0  | -                                             | -                                           | -                                  |  |
| CG5953                 | CG5953    | 0.0                | 0.2  | -1.1 | -                                             | -                                           | -                                  |  |
| CG6006                 | CG6006    | -0.6               | -1.2 | 0.0  | transport                                     | carntine transporter activity               | SLC22A5 OCTN2VT SLC22A13           |  |
| CG6014                 | CG6014    | 0.0                | 1.0  | 0.0  | -                                             | binding                                     | REG1A                              |  |
| CG6045                 | CG6045    | 0.0                | 0.0  | -1.0 | -                                             | xanthine dehydrogenase activity             | XDH AOX1                           |  |
| CG6083                 | CG6083    | -0.4               | -1.3 | -2.2 | mushroom body development                     | aldehyde reductase activity                 | AKR1A1 AKR1B1 AKR1B10              |  |
| CG6126                 | CG6126    | 0.0                | -0.1 | -0.9 | transport                                     | organic cation transmembrane transporter    | SLC22A16 SLC22A13 SLC22A8          |  |
| CG6142                 | CG6142    | 0.1                | -1.1 | -0.4 | cellular alcohol metabolic process            | FAD binding                                 | CHDH                               |  |
| CG6199                 | CG6199    | 0.0                | 0.0  | -0.9 | protein metabolic process                     | procollagen-lysine 5-dioxygenase activity   | PLOD3 PLOD2                        |  |
| CG6201                 | CG6201    | -0.9               | 0.0  | 0.0  | carbohydrate metabolic process                | L-iduronidase activity                      | IDUA                               |  |
| CG6214                 | CG6214    | 0.0                | 0.0  | -1.0 | transport                                     | ATPase activity, coupled to transmembrane   | ABCC1* ABCC3* ABCC4* ABCC12*       |  |
| CG6225                 | CG6225    | -1.2               | -0.1 | 0.0  | cellular process                              | aminopeptidase activity                     | XPMP2 XPMP1                        |  |
| CG6231                 | CG6231    | 0.7                | 0.4  | 0.0  | -                                             | secondary active organic cation transmem    | SLC22A13 SLC22A3 SLC22A5           |  |
| CG6232                 | CG6232    | 0.0                | -0.2 | -2.6 | -                                             | metalloendopeptidase activity               | ADAMTS18 PAPLN ADAMTS16            |  |
| CG6262                 | CG6262    | 0.0                | -2.0 | 1.1  | trehalose metabolic process                   | trehalase activity                          | TREH                               |  |
| CG6294                 | CG6294    | 0.0                | -0.7 | -1.5 | proteolysis                                   | metallopeptidase activity                   | -                                  |  |
| CG6299                 | CG6299    | 0.0                | 0.0  | -1.0 | glycolipid transport                          | glycolipid transporter activity             | GLTP PLEKHA8 PLEKHA9               |  |
| CG6327                 | CG6327    | 0.6                | 1.4  | 1.1  | -                                             | -                                           | SLC36A4 SLC36A2 SLC36A1            |  |
| CG6330                 | CG6330    | 0.0                | 0.0  | -0.9 | nucleoside metabolic process                  | uridine phosphorylase activity              | UPP2 UPP1                          |  |
| CG6340                 | CG6340    | -0.1               | 0.0  | -1.0 | -                                             | -                                           | RSRC2* FLJ11021                    |  |
| CG6357                 | CG6357    | 0.0                | 0.2  | 2.7  | -                                             | cysteine-type endopeptidase activity        | -                                  |  |
| CG6406                 | CG6406    | 0.0                | 0.0  | -1.2 | -                                             | -                                           | FAM126A* FAM126B MGC39518          |  |
| CG6414                 | CG6414    | -1.0               | 0.0  | 0.2  | -                                             | carboxylesterase activity                   | ACHE CES7 CES8                     |  |
| CG6420                 | CG6420    | 0.0                | 0.0  | -2.2 | -                                             | -                                           | WDR20* DMWD                        |  |
| CG6461                 | CG6461    | 0.0                | -0.8 | 0.0  | -                                             | gamma-glutamyltransferase activity          | GGT1* GGT3P GGT2                   |  |
| CG6498                 | CG6498    | 0.0                | -0.2 | -1.8 | protein amino acid phosphorylation            | protein serine/threonine kinase activity    | MAST2 MAST1 MAST3                  |  |
| CG6511                 | CG6511    | -0.7               | 0.0  | -0.6 | -                                             | -                                           | EDRF1*                             |  |
| CG6512                 | CG6512    | 0.0                | 0.0  | -1.1 | -                                             | ATPase activity                             | AFG3L2 SPG7 YME1L1                 |  |
| CG6525                 | CG6525    | 0.0                | 0.0  | -2.5 | regulation of transcription                   | transcription factor activity               | PHF3* DIDO1 SPOCD1                 |  |
| CG6659                 | CG6659    | 0.0                | 0.0  | -1.7 | -                                             | -                                           | DPY19L2 DPY19L1 DPY19L3            |  |
| CG6687                 | CG6687    | 0.6                | 0.0  | 0.0  | ATP synthesis coupled proton transport        | serine-type endopeptidase inhibitor activi  | SERPINB9 SERPINC1 SERPINB8         |  |
| CG6695                 | CG6695    | 0.0                | 0.0  | -1.6 | -                                             | mRNA binding                                | SFRS16*                            |  |
| CG6718                 | CG6718    | 0.0                | 0.0  | -0.9 | lipid metabolic process                       | calcium-independent phospholipase A2 acti   | PLA2G6 PNPLA8 DAPK1                |  |
| CG6752                 | CG6752    | -0.9               | 0.0  | 0.0  | protein binding                               | protein binding                             | RNF123*                            |  |
| CG6763                 | CG6763    | -0.1               | -2.0 | -0.7 | proteolysis                                   | metalloendopeptidase activity               | MEP1B ASTL BMP1                    |  |
| CG6791                 | CG6791    | 0.0                | 0.0  | -2.9 | -                                             | zinc ion binding                            | -                                  |  |

| <i>D. melanogaster</i> |           | Fold Change (log2) |      |      | Gene Ontologies                                  |                                                | <i>H. sapiens</i>           |  |
|------------------------|-----------|--------------------|------|------|--------------------------------------------------|------------------------------------------------|-----------------------------|--|
| Gene Name              | CG number | 2h                 | 4h   | 10h  | Biological Process                               | Molecular Function                             | Gene Name                   |  |
| CG6834                 | CG6834    | -0.1               | -0.7 | 0.0  | -                                                | protein binding                                | -                           |  |
| CG6885                 | CG6885    | 0.0                | -1.4 | 0.0  | -                                                | -                                              | -                           |  |
| CG6933                 | CG6933    | 0.0                | 0.0  | -2.0 | chitin metabolic process                         | structural constituent of peritrophic membr    | -                           |  |
| CG6954                 | CG6954    | -0.2               | 0.0  | -2.3 | signal transduction                              | -                                              | -                           |  |
| CG7017                 | CG7017    | 0.7                | 0.0  | 0.1  | chitin metabolic process                         | structural constituent of peritrophic membr    | -                           |  |
| CG7029                 | CG7029    | 0.0                | -0.1 | -2.5 | -                                                | -                                              | -                           |  |
| CG7072                 | CG34461   | 0.0                | 1.7  | 2.0  | -                                                | structural constituent of chitin-based cuticle | -                           |  |
| CG7134                 | CG7134    | 0.0                | 0.0  | -2.5 | protein amino acid dephosphorylation             | protein tyrosine/serine/threonine phosphat     | CDC14A* CDC14B CDC14C       |  |
| CG7142                 | CG7142    | -2.1               | 0.0  | 0.0  | proteolysis                                      | serine-type endopeptidase activity             | ACR PRSS8 TMRSS9            |  |
| CG7158                 | CG7158    | 0.0                | 0.0  | -1.6 | -                                                | -                                              | ALS2* ALS2CL FL00189        |  |
| CG7207                 | CG7207    | 0.0                | -0.1 | -1.1 | -                                                | protein serine/threonine kinase activity       | COL4A3BP* OSBP OSBP2        |  |
| CG7235                 | CG7235    | 0.0                | -3.2 | 0.0  | open tracheal system development                 | ATPase activity, coupled                       | HSPD1                       |  |
| CG7280                 | CG7280    | 0.0                | 0.0  | -1.6 | protein catabolic process                        | sulfite oxidase activity                       | SUOX                        |  |
| CG7282                 | CG34422   | 0.0                | 0.0  | -1.8 | phagocytosis, engulfment                         | ATP binding                                    | ARID4B* ARID4A ARID5B       |  |
| CG7306                 | CG7306    | 0.9                | 0.0  | 0.0  | chitin metabolic process                         | structural constituent of peritrophic membr    | -                           |  |
| CG7358                 | CG7358    | 0.0                | 0.0  | -2.0 | -                                                | -                                              | -                           |  |
| CG7414                 | CG7414    | 0.0                | 0.1  | -1.1 | regulation of translation                        | tRNA binding                                   | EIF2A* EIF3B                |  |
| CG7497                 | CG7497    | 0.0                | 0.0  | -1.9 | protein amino acid phosphorylation               | protein serine/threonine kinase activity       | -                           |  |
| CG7518                 | CG7518    | 0.0                | 0.0  | -1.6 | -                                                | -                                              | C4orf8*                     |  |
| CG7532                 | CG7532    | 0.0                | -1.1 | 0.0  | -                                                | serine-type endopeptidase activity             | FRRS1*                      |  |
| CG7543                 | CG7543    | 0.1                | 0.8  | 0.4  | -                                                | -                                              | -                           |  |
| CG7556                 | CG7556    | 0.0                | 0.0  | -1.7 | protein folding                                  | unfolded protein binding                       | DNAJC1 DNAJC2 DNAJC10       |  |
| CG7600                 | CG7600    | 0.0                | 0.0  | -1.3 | -                                                | oxygen binding                                 | FAM91A1 FAM91A2             |  |
| CG7611                 | CG7611    | 0.0                | 0.0  | -0.9 | -                                                | -                                              | WDR26* WDR5 WDR5B           |  |
| CG7637                 | CG7637    | 0.0                | 0.0  | 0.5  | -                                                | -                                              | NOP10                       |  |
| CG7669                 | CG7669    | 1.9                | 0.0  | 0.0  | -                                                | -                                              | -                           |  |
| CG7724                 | CG7724    | 0.0                | -0.8 | 0.0  | steroid biosynthetic process                     | oxidoreductase activity, acting on CH-OH gr    | HSD3B2* HSD3B1 HSD3B7       |  |
| CG7766                 | CG7766    | 0.0                | 0.0  | -1.6 | glycogen metabolic process                       | phosphorylase kinase regulator activity        | PHKA1* PHKA2 PHKB           |  |
| CG7816                 | CG7816    | -0.1               | -0.6 | -0.8 | metal ion transport                              | metal ion transmembrane transporter activ      | SLC39A13* SLC39A7 SLC39A14  |  |
| CG7852                 | CG7852    | 0.0                | 0.0  | -1.9 | -                                                | -                                              | DENND5B* DENNDA SBF2        |  |
| CG7906                 | CG7906    | 0.0                | 0.0  | 1.9  | -                                                | -                                              | -                           |  |
| CG7971                 | CG7971    | 0.0                | 0.0  | -1.0 | RNA splicing                                     | -                                              | SRRM2*                      |  |
| CG8029                 | CG8029    | 0.0                | 0.0  | -1.0 | ATP synthesis coupled proton transport           | hydrogen:potassium-exchanging ATPase ac        | -                           |  |
| CG8108                 | CG8108    | 0.0                | 0.0  | -1.1 | -                                                | zinc ion binding                               | -                           |  |
| CG8134                 | CG8134    | 0.0                | -0.1 | -1.1 | -                                                | -                                              | -                           |  |
| CG8184                 | CG8184    | -0.1               | 0.0  | -2.4 | protein modification process                     | ubiquitin-protein ligase activity              | HUWE1* ITCH WWP1            |  |
| CG8192                 | CG8192    | 0.1                | -2.4 | 0.0  | chitin metabolic process                         | chitin binding                                 | -                           |  |
| CG8271                 | CG8271    | -0.1               | -0.3 | -2.1 | -                                                | secondary active monocarboxylate transme       | SLC16A12 SLC16A14 SLC16A7   |  |
| CG8277                 | CG8277    | -1.8               | 0.0  | 0.0  | autophagic cell death                            | RNA cap binding                                | EIF4E1B EIF4E EIF4E2        |  |
| CG8291                 | CG8291    | 0.0                | 0.0  | -1.5 | neurotransmitter transport                       | neurotransmitter transporter activity          | SLC6A1 SLC6A12 SLC6A7       |  |
| CG8399                 | CG8399    | 0.0                | 0.0  | -1.6 | histidine catabolic process                      | dopamine beta-monoxygenase activity            | FRRS1*                      |  |
| CG8405                 | CG8405    | 0.0                | 0.0  | -2.3 | wing disc dorsal/ventral pattern formation       | -                                              | C19orf6*                    |  |
| CG8441                 | CG8441    | 0.0                | 0.1  | 0.8  | -                                                | -                                              | PRKRIP1                     |  |
| CG8444                 | CG8444    | 0.0                | 0.1  | -0.5 | -                                                | receptor activity                              | ATP6AP2                     |  |
| CG8446                 | CG8446    | 0.0                | 0.0  | -0.9 | protein modification process                     | lipoyltransferase activity                     | LIPT1                       |  |
| CG8468                 | CG8468    | 0.0                | 0.0  | -0.9 | -                                                | secondary active monocarboxylate transme       | SLC16A14 SLC16A12 SLC16A6   |  |
| CG8516                 | CG8516    | 0.0                | 0.0  | -2.4 | -                                                | -                                              | -                           |  |
| CG8539                 | CG8539    | 0.6                | -3.1 | 0.4  | proteolysis                                      | metallocarboxypeptidase activity               | CPA2 CPA4 CPO               |  |
| CG8679                 | CG8679    | 0.0                | 0.0  | -2.0 | -                                                | -                                              | LEM3 ANKLE1                 |  |
| CG8693                 | CG8693    | 0.0                | 0.0  | 1.4  | carbohydrate metabolic process                   | alpha-glucosidase activity                     | SLC3A1 SLC3A2               |  |
| CG8768                 | CG8768    | -0.1               | -0.6 | -0.3 | cellular metabolic process                       | coenzyme binding                               | SDR39U1*                    |  |
| CG8773                 | CG8773    | 1.0                | 2.5  | 0.0  | proteolysis                                      | aminopeptidase activity                        | ENPEP ANPEP ERAP1           |  |
| CG8776                 | CG8776    | 0.0                | 1.0  | 0.1  | -                                                | carbon-monoxide oxygenase activity             | CYBRD1 CYBASC3 CYB561       |  |
| CG8785                 | CG8785    | 0.5                | 0.0  | 0.0  | amino acid transport                             | amino acid transmembrane transporter acti      | SLC36A4 SLC36A1 SLC36A2     |  |
| CG8816                 | CG8816    | 0.0                | 0.1  | 0.7  | protein amino acid phosphorylation               | adenylate kinase activity                      | AK6 TAF9                    |  |
| CG8829                 | CG34393   | 0.6                | 2.1  | 0.0  | regulation of small GTPase mediated signal tra   | guanyl-nucleotide exchange factor activity     | RASGEF1B RASGEF1A RASGEF1C  |  |
| CG8863                 | CG8863    | 0.0                | 0.3  | -0.5 | protein folding                                  | unfolded protein binding                       | DKFZp686G2074 DNAJA4 DNAJA1 |  |
| CG8915                 | CG8915    | 0.0                | 0.1  | -1.3 | -                                                | helicase activity                              | DHX36 YTHDC2 DHX29          |  |
| CG8932                 | CG42235   | -0.1               | 0.0  | -1.9 | vitamin transport                                | sodium-dependent multivitamin transmemt        | SLCSA8 SLC5A12 SLC5A6       |  |
| CG8963                 | CG8963    | 0.0                | 0.1  | -1.0 | olfactory behavior                               | protein binding                                | PAIP1*                      |  |
| CG8965                 | CG8965    | 0.0                | -0.1 | -1.4 | signal transduction                              | -                                              | -                           |  |
| CG9005                 | CG9005    | 0.0                | 0.0  | -2.2 | -                                                | -                                              | -                           |  |
| CG9030                 | CG9030    | 0.0                | 1.0  | 0.4  | amino acid metabolic process                     | pyridoxal phosphate binding                    | -                           |  |
| CG9056                 | CG9056    | 0.0                | -0.1 | -2.5 | -                                                | -                                              | -                           |  |
| CG9063                 | CG9063    | 0.0                | 0.0  | -1.9 | -                                                | -                                              | KIAA1432*                   |  |
| CG9164                 | CG9164    | 0.2                | 1.3  | 0.0  | -                                                | -                                              | WSCD2* WSCD1                |  |
| CG9171                 | CG9171    | 0.5                | 0.6  | 0.0  | -                                                | N-acetyllactosaminide beta-1,6-N-acetylglu     | B3GNT1                      |  |
| CG9236                 | CG9236    | 0.0                | 2.7  | 0.0  | -                                                | calcium-dependent protein serine/threonine     | CIB3 CIB2 CIB1              |  |
| CG9270                 | CG9270    | 2.0                | 0.0  | 0.0  | transport                                        | ATPase activity, coupled to transmembrane      | ABCC4* ABCC1* ABCC3*        |  |
| CG9281                 | CG9281    | 0.0                | 0.0  | -0.9 | -                                                | ATPase activity, coupled to transmembrane      | ABCF2 ABCF3 ABCF1           |  |
| CG9290                 | CG9290    | -2.4               | 1.2  | 0.1  | -                                                | structural constituent of adult chitin-based   | -                           |  |
| CG9312                 | CG9312    | -0.3               | -0.1 | 2.4  | -                                                | -                                              | -                           |  |
| CG9317                 | CG9317    | -0.1               | -0.7 | -2.2 | -                                                | secondary active organic cation transmemt      | SLC22A3 SLC22A5 SLC22A4     |  |
| CG9380                 | CG9380    | 0.1                | 1.9  | 0.2  | -                                                | -                                              | -                           |  |
| CG9411                 | CG9411    | 0.0                | 0.1  | -2.5 | -                                                | -                                              | -                           |  |
| CG9425                 | CG9425    | 0.0                | 0.0  | -1.7 | tRNA aminoacylation for protein translation      | ATP binding                                    | HELZ PRIC285 MOV10L1        |  |
| CG9430                 | CG9430    | -0.9               | 0.0  | 0.0  | metal ion transport                              | metal ion transmembrane transporter activ      | SLC39A1 SLC39A3 SLC39A2     |  |
| CG9444                 | CG9444    | 0.0                | -0.1 | -2.4 | oligopeptide transport                           | proton-dependent oligopeptide secondary a      | SLC15A1 SLC15A2 hPEPT1-RF   |  |
| CG9485                 | CG9485    | -0.1               | 0.0  | -2.2 | glycogen biosynthetic process                    | 4-alpha-glucanotransferase activity            | AGL*                        |  |
| CG9536                 | CG9536    | 0.0                | 0.0  | -0.9 | -                                                | -                                              | TMEM115                     |  |
| CG9573                 | CG9573    | -0.7               | -0.4 | 0.0  | -                                                | -                                              | RQC1*                       |  |
| CG9616                 | CG9616    | 0.0                | 0.0  | 2.0  | -                                                | -                                              | -                           |  |
| CG9649                 | CG9649    | 0.0                | 2.4  | 0.1  | proteolysis                                      | endopeptidase activity                         | PRSS7 TMRSS9 ESSPL          |  |
| CG9650                 | CG9650    | -0.1               | 1.6  | 1.0  | -                                                | zinc ion binding                               | BCL11A BCL11B ZNF296        |  |
| CG9673                 | CG9673    | -1.7               | 0.0  | 0.0  | proteolysis                                      | serine-type endopeptidase activity             | TMRSS4 TPSA81 CELA2A        |  |
| CG9674                 | CG9674    | 0.0                | 0.0  | -1.8 | glutamate biosynthetic process                   | glutamate synthase (NADPH) activity            | DPYD                        |  |
| CG9676                 | CG9676    | 0.6                | 0.0  | 0.2  | proteolysis                                      | serine-type endopeptidase activity             | TMRSS6 TMRSS11D LKKB1       |  |
| CG9782                 | CG9782    | -1.0               | 0.0  | 0.2  | -                                                | -                                              | -                           |  |
| CG9813                 | CG9813    | 0.0                | -1.2 | 0.0  | ATP synthesis coupled proton transport           | hydrolase activity, acting on acid anhydride   | -                           |  |
| CG9867                 | CG9867    | 0.0                | 0.0  | -1.8 | -                                                | transferase activity, transferrin glycosyl or  | AER61*                      |  |
| CG9941                 | CG9941    | 0.0                | -0.3 | -2.4 | -                                                | protein binding                                | RNF157* MGRN1               |  |
| CG9977                 | CG9977    | 0.0                | 0.0  | -2.0 | one-carbon compound metabolic process            | adenosylthomocysteinease activity              | AHCYL1* AHCYL2 AHCY         |  |
| CG9989                 | CG9989    | 0.3                | 0.3  | 2.9  | -                                                | endonuclease activity                          | -                           |  |
| Chc                    | CG9012    | 0.0                | 0.0  | -0.9 | sperm individualization                          | protein binding                                | CLTC* CLTCL1*               |  |
| Chd1                   | CG3733    | 0.0                | 0.0  | -1.6 | fertilization, exchange of chromosomal proteins  | chromatin binding                              | CHD2* CHD1 CHD4             |  |
| Ch2                    | CG2054    | 0.0                | 0.0  | -0.9 | cuticle chitin catabolic process                 | chitinase activity                             | CHIA CHIT1 CHI3L1           |  |
| ci                     | CG2125    | -0.1               | 0.0  | 2.0  | smoothed signaling pathway                       | transcription factor activity                  | GLI2* GLI3 GLI1             |  |
| Cka                    | CG7392    | 0.0                | 0.0  | -1.5 | JNK cascade                                      | protein binding                                | STRN3* STRN4 STRN           |  |
| comm2                  | CG7554    | -0.4               | -0.8 | 0.0  | -                                                | -                                              | -                           |  |
| Cpr                    | CG11567   | 0.0                | 0.0  | -1.2 | -                                                | NADPH-hemoprotein reductase activity           | POR DKFZp686G04235 NDOR1    |  |
| Crag                   | CG12737   | 0.0                | 0.0  | -1.7 | -                                                | calmodulin binding                             | DENND4A DENND4B DENND4C     |  |
| CSN1a                  | CG4597    | 1.2                | -1.5 | -2.6 | regulation of G-protein coupled receptor protein | regulator of G-protein signaling activity      | GPS1                        |  |
| CTBP                   | CG7583    | 0.0                | 0.0  | -1.0 | embryonic development via the syncytial blastoc  | protein binding                                | CTBP2* CTBP1 PHGDH          |  |
| Cyp12c1                | CG4120    | 0.0                | 1.5  | -0.4 | -                                                | electron carrier activity                      | CYP24A1 CYP27C1 CYP11A1     |  |
| Cyp311a1               | CG1488    | 0.0                | 0.0  | -2.5 | -                                                | electron carrier activity                      | CYP4V2 CYP4A11 CYP4A22      |  |
| Cyp4ac1                | CG14032   | -2.0               | 0.0  | 1.2  | hormone metabolic process                        | electron carrier activity                      | CYP4V2 CYP4F8 CYP4F12       |  |
| Cyp4e1                 | CG2062    | -1.3               | -2.0 | -2.4 | -                                                | electron carrier activity                      | CYP4V2 CYP4F11 CYP4F2       |  |
| Cyp4p3                 | CG10843   | 0.0                | 0.6  | 1.3  | -                                                | electron carrier activity                      | CYP4V2 CYP4F3 CYP4F8        |  |
| Cyp6a18                | CG13977   | 0.0                | -2.4 | 0.0  | -                                                | electron carrier activity                      | CYP3A5 CYP3A4 CYP3A7        |  |
| Cyp6a21                | CG10247   | 0.1                | 0.5  | 0.8  | -                                                | electron carrier activity                      | CYP3A5 CYP3A7 CYP3A4        |  |
| Cyp6v1                 | CG1829    | 0.0                | -0.1 | -2.0 | -                                                | electron carrier activity                      | CYP3A5 CYP3A7 CYP3A4        |  |
| Cyp9h1                 | CG17577   | 0.0                | -1.1 | 0.1  | -                                                | electron carrier activity                      | CYP3A5 CYP3A4 CYP3A7        |  |
| di                     | CG10595   | -1.8               | 0.0  | 0.0  | leg disc development                             | ATPase activity, coupled                       | MYO6 MYO1B MYO1A            |  |
| da                     | CG5102    | 0.0                | 0.1  | -1.0 | regulation of transcription, DNA-dependent       | specific RNA polymerase II transcription fac   | TCF4* TCF12 TCF3            |  |
| DAAM                   | CG14622   | 0.0                | 0.0  | -2.7 | actin cytoskeleton organization                  | actin binding                                  | DAAM1* DAAM2 FMNL3          |  |
| Dab                    | CG9695    | 0.0                | 0.0  | -3.0 | compound eye photoreceptor development           | SH2 domain binding                             | DAB1* DAB2                  |  |

| <i>D. melanogaster</i> |           | Fold Change (log2) |      | Gene Ontologies |                                                     | <i>H. sapiens</i>                              |                           |
|------------------------|-----------|--------------------|------|-----------------|-----------------------------------------------------|------------------------------------------------|---------------------------|
| Gene Name              | CG number | 2h                 | 4h   | 10h             | Biological Process                                  | Molecular Function                             | Gene Name                 |
| <i>dalao</i>           | CG7055    | 0.0                | 0.0  | -1.0            | positive regulation of transcription, DNA-depend    | transcription coactivator activity             | -                         |
| <i>Dbbp80</i>          | CG17023   | 0.0                | 0.3  | 0.5             | -                                                   | ATP-dependent RNA helicase activity            | DDX19B* DDX19A TDBP       |
| <i>dco</i>             | CG2048    | 0.0                | 0.0  | -1.1            | imaginal disc growth                                | protein serine/threonine kinase activity       | CSNK1E CSNK1D CSNK1A1     |
| <i>Dhc64C</i>          | CG7507    | 0.0                | 0.0  | -1.9            | cellularization                                     | ATPase activity, coupled                       | DNAH6* DNAH2* DNAH1*      |
| <i>dhd</i>             | CG4193    | 0.0                | -2.0 | 0.0             | embryonic development                               | disulfide oxidoreductase activity              | TXN TXNDC2 TXN2           |
| <i>dimm</i>            | CG8667    | -1.3               | -0.9 | -2.7            | regulation of transcription                         | transcription factor activity                  | BHLHA15 NEUROD6 NEUROD1   |
| <i>disco</i>           | CG9908    | 0.0                | 0.0  | 2.2             | positive regulation of transcription from RNA pol   | DNA binding                                    | BNC2* BNC1                |
| <i>dl</i>              | CG6667    | 0.4                | 0.6  | 0.0             | immune response                                     | transcription factor activity                  | REL RELA RELB             |
| <i>Dl</i>              | CG3619    | -1.5               | 0.0  | 0.4             | germ-line stem cell maintenance                     | Notch binding                                  | DLL1 JAG1 DLL4            |
| <i>Dll</i>             | CG3629    | 0.4                | 0.0  | -2.7            | proboscis development                               | specific RNA polymerase II transcription fac   | DLX1 DLX2 DLX6            |
| <i>DnaJ-1</i>          | CG10578   | -0.8               | 0.0  | -0.1            | response to heat                                    | unfolded protein binding                       | DNAJB4 DNAJB5 DNAJB1      |
| <i>DNAPol-delta</i>    | CG5949    | 0.0                | 0.0  | -2.7            | lagging strand elongation                           | DNA-directed DNA polymerase activity           | POLD1 REV3L POLA1         |
| <i>Dnr1</i>            | CG12489   | 0.0                | -0.3 | -2.1            | immune response                                     | protein binding                                | MYLIP*                    |
| <i>dom</i>             | CG9696    | 0.0                | 0.0  | -1.7            | cell proliferation                                  | helicase activity                              | SRCAP EP400 INO80         |
| <i>dome</i>            | CG14226   | 0.3                | 0.8  | -0.8            | JAK-STAT cascade                                    | transmembrane receptor activity                | DSCAML1 SDK2 PTPRQ        |
| <i>dpr17</i>           | CG31361   | 0.0                | 0.0  | -1.5            | -                                                   | -                                              | -                         |
| <i>Dro</i>             | CG10816   | 0.0                | -0.7 | 0.0             | defense response to Gram-negative bacterium         | -                                              | -                         |
| <i>drongo</i>          | CG3365    | 0.2                | 0.7  | 0.0             | regulation of ARF GTPase activity                   | ARF GTPase activator activity                  | AGFG1 AGFG2               |
| <i>Dys</i>             | CG3957    | 0.0                | -4.0 | 0.0             | imaginal disc-derived wing vein morphogenesis       | structural molecule activity                   | DMD* UTRN dystrophin      |
| <i>e</i>               | CG3331    | -0.6               | 0.2  | -2.0            | cuticle pigmentation                                | beta-alanyl-dopamine synthase activity         | AASDH ACS51 ACSF3         |
| <i>e(y)3</i>           | CG12238   | 0.0                | 0.2  | -2.0            | gene silencing                                      | chromatin binding                              | PHF10* DPF2 MYST3         |
| <i>Eaat2</i>           | CG3159    | -1.2               | 0.0  | -2.8            | taurine transport                                   | glutamate:sodium symporter activity            | SLC1A2 SLC1A1 SLC1A7      |
| <i>east</i>            | CG4399    | 0.0                | 0.0  | -2.3            | achiasmata meiosis I                                | metallocalcboxypeptidase activity              | -                         |
| <i>Ect4</i>            | CG34373   | 0.2                | 0.4  | -2.1            | signal transduction                                 | binding                                        | SARM1*                    |
| <i>eEF1delta</i>       | CG4912    | 0.0                | 0.4  | 0.5             | translational elongation                            | translational elongation factor activity       | EEF1B2                    |
| <i>Egfr</i>            | CG10079   | -1.5               | 0.0  | -1.0            | dorsal appendage formation                          | epidermal growth factor receptor activity      | EGFR* ERBB3 ERBB4         |
| <i>eIF-4B</i>          | CG10837   | 0.0                | 0.0  | 0.7             | translational initiation                            | translational initiation factor activity       | -                         |
| <i>eIF-5C</i>          | CG2922    | 0.0                | 0.4  | 0.4             | -                                                   | -                                              | BZW1* BZW2 BZW1L1         |
| <i>Eig71Ec</i>         | CG7608    | -0.7               | 0.0  | 2.1             | -                                                   | -                                              | -                         |
| <i>Eig71Ec</i>         | CG7604    | 0.0                | -1.2 | 0.0             | puparial adhesion                                   | structural molecule activity                   | -                         |
| <i>Eig71Eh</i>         | CG7594    | 0.0                | 1.1  | -0.1            | -                                                   | -                                              | -                         |
| <i>Eig71Ek</i>         | CG7325    | 1.2                | 2.0  | 0.0             | -                                                   | -                                              | -                         |
| <i>Eip75B</i>          | CG8127    | 0.0                | -0.2 | -3.1            | ecdysone-mediated induction of salivary gland c     | ligand-dependent nuclear receptor activity     | PPARG NR1C3 PPARD         |
| <i>en</i>              | CG9015    | 0.0                | 0.0  | 2.1             | neuroblast fate determination                       | specific RNA polymerase II transcription fac   | EN2 EN1 HOXC5             |
| <i>eve</i>             | CG2328    | -1.7               | 0.9  | -0.1            | negative regulation of cardioblast cell fate specif | transcription factor activity                  | EVX1 EVX2 HOXA2           |
| <i>faf</i>             | CG1945    | -0.1               | 0.0  | -1.9            | cellularization                                     | ubiquitin-specific protease activity           | USP9X* USP9Y* USP24       |
| <i>fan</i>             | CG7919    | -0.8               | -0.3 | 0.0             | -                                                   | structural molecule activity                   | VAPA VAPB                 |
| <i>fat-spandin</i>     | CG6953    | 0.0                | 0.0  | -1.9            | -                                                   | serine-type endopeptidase inhibitor activity   | SPON1 SPON2 SPINT1        |
| <i>fau</i>             | CG6544    | -0.5               | 0.0  | -1.8            | -                                                   | -                                              | -                         |
| <i>fdl</i>             | CG8924    | 0.0                | 0.0  | -0.9            | brain development                                   | beta-N-acetylhexosaminidase activity           | HEXB                      |
| <i>feo</i>             | CG11207   | 0.0                | 0.0  | -1.3            | cytokinesis                                         | -                                              | -                         |
| <i>fig</i>             | CG7615    | -2.8               | 0.0  | 0.0             | -                                                   | phosphoprotein phosphatase activity            | PPTC7                     |
| <i>form3</i>           | CG33556   | 0.0                | 0.0  | -2.6            | branch fusion, open tracheal system                 | actin binding                                  | FHDC1 INF2 DAAM1          |
| <i>fos28F</i>          | CG18103   | -1.2               | 0.0  | 0.0             | -                                                   | -                                              | -                         |
| <i>fru</i>             | CG14307   | 0.8                | 0.0  | 0.0             | male courtship behavior, veined wing vibration      | transcription factor activity                  | -                         |
| <i>fry</i>             | CG32045   | 0.0                | 0.8  | -1.0            | rhabdomere development                              | transcription activator activity               | FRYL* FRY WUGSC:H_2G3A.1  |
| <i>fs(1)M3</i>         | CG4790    | 0.0                | 0.0  | -2.0            | vitelline membrane formation in chorion-contain     | -                                              | -                         |
| <i>fs(1)Ya</i>         | CG2707    | 0.0                | 0.0  | -2.1            | nuclear division                                    | protein binding                                | -                         |
| <i>fs(1)Yb</i>         | CG2706    | 0.0                | 0.0  | -1.8            | germ-line stem cell division                        | -                                              | -                         |
| <i>fs(2)toPP43</i>     | CG19528   | 0.0                | 0.0  | -0.9            | chorion-containing eggshell formation               | -                                              | -                         |
| <i>fur2</i>            | CG18734   | 0.0                | 0.0  | -1.6            | proteolysis                                         | serine-type endopeptidase activity             | PCSK6* PCSK5 FURIN        |
| <i>Galpha49B</i>       | CG17759   | 0.0                | 1.3  | -0.1            | activation of phospholipase C activity              | GTPase activity                                | GNAQ GNA11 GNA14          |
| <i>Galpha73B</i>       | CG12232   | 1.2                | 2.6  | 2.9             | G-protein coupled receptor protein signaling patl   | GTPase activity                                | GNAS GNAL GSA             |
| <i>garz</i>            | CG8487    | 0.0                | -0.1 | -1.5            | ER to Golgi vesicle-mediated transport              | guanyl-nucleotide exchange factor activity     | GBF1                      |
| <i>Gbeta13F</i>        | CG10545   | 0.0                | 0.2  | -0.6            | actin filament organization                         | GTPase activity                                | GNB4 GNB2 GNB1            |
| <i>Gbeta76C</i>        | CG8770    | -1.7               | 0.0  | 0.0             | deactivation of rhodopsin mediated signaling        | GTPase activity                                | GNB4 GNB2 GNB3            |
| <i>gce</i>             | CG6211    | 0.0                | 0.0  | -1.7            | regulation of transcription                         | transcription factor activity                  | ARNTL ARNTL2 NPAS2        |
| <i>Gdh</i>             | CG5320    | 0.0                | 0.0  | -0.6            | sperm storage                                       | glutamate dehydrogenase [NAD(P)+] activi       | GLUD1 GLUD2               |
| <i>Gic26</i>           | CG9491    | -0.6               | -0.5 | -0.4            | axon target recognition                             | guanyl-nucleotide exchange factor activity     | RAPGEF2 RAPGEF6 RAPGEF4   |
| <i>Gic7-1</i>          | CG6437    | -0.2               | 0.0  | -2.3            | negative regulation of apoptosis                    | ceramide glucosyltransferase activity          | UGCG                      |
| <i>Gli</i>             | CG8903    | 0.0                | -0.5 | -2.1            | establishment of blood-nerve barrier                | carboxylesterase activity                      | NLGN3 NLGN4 NLGN4X        |
| <i>Gp93</i>            | CG5520    | 0.0                | 0.0  | -0.9            | protein folding                                     | unfolded protein binding                       | HSP90B1 GRP94C HSP90B2P   |
| <i>Gr22a</i>           | CG31662   | 0.1                | 0.3  | 3.8             | sensory perception of taste                         | taste receptor activity                        | -                         |
| <i>Gr47b</i>           | CG30030   | 0.0                | -0.9 | -0.1            | sensory perception of taste                         | taste receptor activity                        | -                         |
| <i>Gr59f</i>           | CG33150   | 0.0                | -2.1 | 0.0             | sensory perception of taste                         | taste receptor activity                        | -                         |
| <i>Gr66a</i>           | CG7189    | 0.0                | 0.0  | -1.7            | sensory perception of taste                         | taste receptor activity                        | -                         |
| <i>Gr85a</i>           | CG31405   | 0.0                | 0.0  | -2.5            | sensory perception of taste                         | taste receptor activity                        | -                         |
| <i>Gr89a</i>           | CG14901   | 0.0                | -2.5 | 0.0             | sensory perception of taste                         | -                                              | -                         |
| <i>Gr98d</i>           | CG31061   | 0.0                | 0.1  | -2.2            | sensory perception of taste                         | taste receptor activity                        | -                         |
| <i>Grip</i>            | CG14447   | 0.1                | -0.1 | -2.5            | determination of muscle attachment site             | protein binding                                | GRIP1 GRIP2 DLG1          |
| <i>grip</i>            | CG17611   | 0.0                | 0.0  | -0.9            | protein amino acid phosphorylation                  | protein serine/threonine kinase activity       | CHEK1 PRKAA1 MARK3        |
| <i>Gry</i>             | CG17569   | 0.0                | 0.0  | -1.2            | learning or memory                                  | -                                              | C4orf41                   |
| <i>GstE8</i>           | CG17533   | 0.0                | -1.0 | 0.0             | -                                                   | -                                              | GSTT1 GSTT2               |
| <i>hbs</i>             | CG7449    | 1.9                | -2.3 | -2.6            | regulation of striated muscle development           | -                                              | NPHS1 HMCN1 KIRREL        |
| <i>Hdac3</i>           | CG2128    | 0.0                | 0.0  | -0.9            | histone deacetylation                               | histone deacetylase activity                   | HDAC3* HDAC2 HDAC1        |
| <i>HDAC6</i>           | CG6170    | 0.0                | 0.0  | -2.7            | histone deacetylation                               | histone deacetylase activity                   | HDAC10 HDAC9 HDAC4        |
| <i>He</i>              | CG31770   | 0.0                | -2.9 | 0.0             | innate immune response                              | -                                              | -                         |
| <i>Hel89B</i>          | CG4261    | 0.0                | 0.3  | -1.0            | antimicrobial humoral response                      | helicase activity                              | BTAF1 ERCC6 SMARCA1       |
| <i>HERC2</i>           | CG11734   | 0.0                | 0.0  | -6.0            | regulation of mitotic metaphase/anaphase transi     | guanyl-nucleotide exchange factor activity     | HERC2 DKFZp547P028 HERC1  |
| <i>Hex-1</i>           | CG33102   | -1.4               | 0.1  | 0.0             | glycolysis                                          | hexokinase activity                            | HK1 HKDC1 HK2             |
| <i>Hexo2</i>           | CG17987   | -0.1               | 0.1  | -1.1            | carbohydrate metabolic process                      | beta-N-acetylhexosaminidase activity           | HEXB                      |
| <i>Hic2A-CG3382</i>    | CG33820   | 0.0                | -0.6 | 0.4             | chromatin assembly or disassembly                   | DNA binding                                    | HIST1H2AA HIST2H2AB H2AF3 |
| <i>HLH106</i>          | CG8522    | 0.0                | 0.0  | -1.3            | fatty acid biosynthetic process                     | transcription factor activity                  | SREBF2 SREBF1             |
| <i>HLHm3</i>           | CG8346    | -0.1               | 0.0  | -2.0            | Notch signaling pathway                             | transcription factor activity                  | HES1 HES4                 |
| <i>Hmu</i>             | CG3373    | 0.0                | 0.0  | -1.0            | biosynthetic process                                | mRNA binding                                   | APMAP* C20orf3            |
| <i>Hnf4</i>            | CG9310    | 0.0                | 0.0  | -1.6            | lipid biosynthetic process                          | ligand-dependent nuclear receptor activity     | HNFA4* HNF4G NR2A3        |
| <i>Hrb27C</i>          | CG10377   | 0.0                | 0.0  | -0.9            | negative regulation of oskar mRNA translation       | mRNA 3'-UTR binding                            | DAZAP1* MS12 MS11         |
| <i>Hsc70-3</i>         | CG4147    | 0.0                | 0.0  | -0.9            | sleep                                               | ATPase activity                                | HSPA8* HSPA5 HSPA2        |
| <i>Hsp27</i>           | CG4466    | 0.5                | 1.4  | 1.3             | determination of adult life span                    | -                                              | HSPB1 CRYAB HSPB2         |
| <i>Hsp67Bb</i>         | CG4456    | -0.8               | 0.0  | 0.0             | response to heat                                    | -                                              | KAT*                      |
| <i>Hsp68</i>           | CG5436    | -1.1               | 0.0  | -0.9            | determination of adult life span                    | unfolded protein binding                       | HSPA8* HSPA1A HSPA1L      |
| <i>Hsp70Aa</i>         | CG31366   | -2.1               | -0.2 | 0.0             | heat shock-mediated polytene chromosome puff        | ATP binding                                    | HSPA8* HSPA1A HSPA1L      |
| <i>Hsp70Bb</i>         | CG31359   | -1.5               | 0.0  | -0.1            | heat shock-mediated polytene chromosome puff        | ATP binding                                    | HSPA8* HSPA1A HSPA1L      |
| <i>Hsp70Bc</i>         | CG6489    | -1.8               | 0.0  | -0.1            | heat shock-mediated polytene chromosome puff        | ATP binding                                    | HSPA8* HSPA1A HSPA1L      |
| <i>htt</i>             | CG9995    | 0.0                | 0.0  | -2.1            | axon cargo transport                                | microtubule binding                            | HIT                       |
| <i>Idgf1</i>           | CG4472    | 0.0                | 0.9  | 2.9             | imaginal disc development                           | imaginal disc growth factor activity           | CHIT1 CHI3L2 CHIA         |
| <i>Ih</i>              | CG8585    | 0.0                | -0.8 | 1.4             | potassium ion transport                             | intracellular cyclic nucleotide activated cati | -                         |
| <i>iHog</i>            | CG9211    | 0.0                | 0.0  | -1.7            | smoothened signaling pathway                        | heparin binding                                | NEO1 BOC HMCN1            |
| <i>Iip5</i>            | CG33273   | 0.1                | 0.3  | -2.2            | insulin receptor signaling pathway                  | insulin receptor binding                       | -                         |
| <i>Imp</i>             | CG1691    | -1.1               | 0.0  | 0.0             | spermatogenesis                                     | mRNA binding                                   | IGF2BP2 IGF2BP1 IGF2BP3   |
| <i>Ipk1</i>            | CG30295   | -0.4               | -0.4 | -3.4            | inositol and derivative phosphorylation             | inositol pentakisphosphate 2-kinase activity   | IPK                       |
| <i>Ipod</i>            | CG2961    | 0.0                | 2.2  | 0.0             | DNA methylation                                     | -                                              | -                         |
| <i>Irk2</i>            | CG4370    | 0.7                | -0.5 | 1.8             | potassium ion transport                             | -                                              | -                         |
| <i>Jing</i>            | CG9397    | 0.0                | 0.0  | -2.2            | specification of segmental identity, maxillary seg  | transcription repressor activity               | KNJ12 KNJ9 KNJ5           |
| <i>Jon65Aii</i>        | CG6580    | -1.8               | 0.0  | 0.3             | proteolysis                                         | serine-type endopeptidase activity             | TMPRSS11D TMPRSS11B KLK7  |
| <i>Jon74E</i>          | CG6298    | -0.1               | 0.6  | 0.0             | proteolysis                                         | serine-type endopeptidase activity             | CELA3B CTRC CELA3A        |
| <i>Jupiter</i>         | CG31363   | -0.8               | -0.1 | 1.3             | -                                                   | microtubule binding                            | -                         |
| <i>Karybeta3</i>       | CG1059    | 0.0                | 0.1  | -1.1            | protein import into nucleus                         | protein transmembrane transporter activity     | IP05* RANBP6              |
| <i>kdn</i>             | CG3861    | 0.0                | -0.3 | -1.0            | tricarboxylic acid cycle                            | citrate (S)-synthase activity                  | -                         |
| <i>kek5</i>            | CG12199   | 0.9                | 0.0  | 0.0             | -                                                   | protein binding                                | LRFN1 LRFN4 PXDNL         |
| <i>ki-2</i>            | CG17866   | 0.0                | 1.7  | -0.3            | microtubule-based movement                          | motor activity                                 | DNAH2 DNAH1 DNAH3         |
| <i>ki-3</i>            | CG17829   | 0.0                | 0.0  | -2.2            | microtubule-based movement                          | microtubule binding                            | DNAH8* DNAH10* DNAH8*     |
| <i>Klp3A</i>           | CG8590    | 0.0                | 0.0  | -1.2            | cytokinesis                                         | microtubule motor activity                     | KIF4A* KIF4B KIF21B       |
| <i>ko</i>              | CG10573   | -2.0               | 0.0  | 2.5             | motor axon guidance                                 | -                                              | STOX1* STOX2              |
| <i>KP78b</i>           | CG17216   | 0.0                | 0.0  | -2.3            | protein amino acid phosphorylation                  | protein serine/threonine kinase activity       | MARK3 MARK4 MARK2         |
| <i>KrT95D</i>          | CG5405    | -0.1               | -0.1 | -1.9            | protein targeting to Golgi                          | -                                              | PACS2* PACS1              |

| <b><i>D. melanogaster</i></b> |                  |           | <b>Fold Change<br/>(log2)</b> | <b>Gene Ontologies</b> | <b><i>H. sapiens</i></b>                          |                                             |                              |
|-------------------------------|------------------|-----------|-------------------------------|------------------------|---------------------------------------------------|---------------------------------------------|------------------------------|
| <b>Gene Name</b>              | <b>CG number</b> | <b>2h</b> | <b>4h</b>                     | <b>10h</b>             | <b>Gene Name</b>                                  |                                             |                              |
| <i>kto</i>                    | CG8491           | 0.0       | 0.0                           | -1.9                   | transcription initiation from RNA polymerase II p | RNA polymerase II transcription mediator a  | MED12L* MED12                |
| <i>kuk</i>                    | CG5175           | 0.0       | 0.0                           | -0.5                   | nucleus organization                              | -                                           | -                            |
| <i>L</i>                      | CG10109          | 0.0       | 0.0                           | -0.9                   | negative regulation of programmed cell death      | -                                           | -                            |
| <i>(1)G0222</i>               | CG8465           | 0.0       | 0.0                           | -1.7                   | -                                                 | -                                           | ANKLE2*                      |
| <i>(1)G0289</i>               | CG2221           | 0.0       | 0.0                           | -1.0                   | -                                                 | -                                           | PLXDC2* PLXDC1               |
| <i>(2)35Df</i>                | CG4152           | 0.0       | 0.0                           | -0.9                   | -                                                 | -                                           | SKIV2L2 SKIV2L SKIV2W        |
| <i>(2)gl</i>                  | CG2671           | 0.0       | 1.3                           | 2.4                    | neurotransmitter secretion                        | ATP-dependent RNA helicase activity         | LLGL1 LLLGL2 STXBPS          |
| <i>(2)K05819</i>              | CG3054           | 0.3       | 2.0                           | -0.7                   | -                                                 | -                                           | KIAA0195*                    |
| <i>(2)K16918</i>              | CG3920           | -0.2      | -1.0                          | 0.0                    | -                                                 | -                                           | -                            |
| <i>(3)02640</i>               | CG9165           | 0.0       | 0.0                           | -1.6                   | tetrapyrrole biosynthetic process                 | hydroxymethylbilane synthase activity       | HMBS*                        |
| <i>(3)05822</i>               | CG7129           | -0.1      | 0.0                           | -1.1                   | -                                                 | -                                           | SH3D19                       |
| <i>(3)82Fd</i>                | CG32464          | -0.1      | 0.0                           | -1.9                   | cell wall catabolic process                       | -                                           | NCOA7* OXR1 C20orf118        |
| <i>LamC</i>                   | CG10119          | 0.0       | 0.0                           | -1.1                   | mitotic nuclear envelope reassembly               | structural molecule activity                | LMNA LMNB2 LMNB1             |
| <i>LamB1</i>                  | CG7123           | 0.0       | 0.0                           | -1.1                   | embryonic morphogenesis                           | -                                           | LAMB4* LAMB1 LAMB2           |
| <i>lig</i>                    | CG8715           | 0.0       | 0.0                           | -1.3                   | copulation                                        | -                                           | UBAP2                        |
| <i>lilli</i>                  | CG8817           | 0.0       | -0.7                          | 1.0                    | periodic partitioning                             | DNA binding                                 | -                            |
| <i>lin19</i>                  | CG1877           | 0.0       | 0.0                           | -0.9                   | ubiquitin-dependent protein catabolic process     | ubiquitin protein ligase binding            | CUL1 CUL2 CUL3               |
| <i>Lk6</i>                    | CG17342          | 0.0       | 0.0                           | -1.2                   | microtubule-based process                         | protein kinase activity                     | MKNK1* MKNK2 DKFZp686E14208  |
| <i>LpR1</i>                   | CG50694          | 0.0       | 0.7                           | -0.1                   | cholesterol metabolic process                     | lipoprotein binding                         | VLDLR LDLR LRP8              |
| <i>Lsp1beta</i>               | CG4178           | 0.0       | 0.0                           | -1.9                   | transport                                         | nutrient reservoir activity                 | -                            |
| <i>lva</i>                    | CG6450           | 0.0       | 0.1                           | -2.2                   | cellularization                                   | actin binding                               | -                            |
| <i>mal</i>                    | CG1692           | 0.0       | -0.1                          | -1.0                   | ommochrome biosynthetic process                   | Mo-molybdopterin cofactor sulfurase activit | MOCOS MOSC1 MOSC2            |
| <i>mam</i>                    | CG8118           | 0.0       | 0.1                           | -1.7                   | ectoderm development                              | -                                           | -                            |
| <i>Map60</i>                  | CG1825           | 0.0       | 0.0                           | -0.9                   | microtubule-based process                         | microtubule binding                         | -                            |
| <i>Marf</i>                   | CG3869           | 0.0       | 0.0                           | -1.0                   | mitochondrion organization                        | GTP binding                                 | MFN2* MFN1* hfoz2            |
| <i>mars</i>                   | CG17064          | 0.0       | 0.0                           | -1.5                   | cell-cell signaling                               | -                                           | DLGAP5                       |
| <i>Mcm2</i>                   | CG7538           | 0.0       | 0.0                           | -0.6                   | pre-replicative complex assembly                  | chromatin binding                           | MCM2 MCM5 MCM6               |
| <i>MeF2</i>                   | CG1429           | 0.2       | 0.0                           | -2.2                   | mesoderm development                              | RNA polymerase II transcription factor acti | MEF2A* MEF2D MEF2C           |
| <i>Meis1L</i>                 | CG7517           | 0.0       | 0.0                           | -1.6                   | MAP kinase kinase activity                        | MAP kinase kinase activity                  | MAP3K4* MAP3K3 YSK4          |
| <i>MESR4</i>                  | CG4933           | -0.5      | 0.0                           | -1.7                   | protein amino acid phosphorylation                | protein binding                             | -                            |
| <i>mew</i>                    | CG1771           | 0.0       | 0.0                           | -1.9                   | cell adhesion                                     | cell adhesion molecule binding              | ITGA7* ITGA6 ITGA3           |
| <i>mfas</i>                   | CG3359           | 0.0       | 0.8                           | 1.0                    | axogenesis                                        | -                                           | TGFB1 POSTN                  |
| <i>Mgat2</i>                  | CG7921           | 0.0       | -0.2                          | -2.3                   | protein amino acid terminal N-glycosylation       | alpha-1,6-mannosylcoprotein 2-beta-N-i      | -                            |
| <i>Mhcl</i>                   | CG31045          | -0.1      | -0.9                          | 0.0                    | -                                                 | ATPase activity, coupled                    | MYO18A                       |
| <i>Mi-2</i>                   | CG8103           | 0.0       | 0.0                           | -1.7                   | nucleosome mobilization                           | ATPase activity                             | CHD4* CHD3* CHD5             |
| <i>mib1</i>                   | CG5841           | 0.0       | 0.0                           | -1.6                   | positive regulation of endocytosis                | protein binding                             | MIB1 MIB2 ANK3               |
| <i>mib2</i>                   | CG17492          | 0.0       | 0.0                           | -1.5                   | myoblast fusion                                   | protein binding                             | MIB2* MIB1 DKFZp686I225      |
| <i>Mical</i>                  | CG33208          | -0.1      | 0.0                           | -3.7                   | axon guidance                                     | actin binding                               | MICAL3* MICAL2* MICAL2PV1    |
| <i>milit</i>                  | CG13774          | 0.0       | 0.0                           | -2.1                   | axon transport of mitochondrion                   | protein binding                             | TRAK1* DKFZp686M03244 TRAK2  |
| <i>mp120</i>                  | CG15277          | 0.0       | 0.0                           | -1.0                   | eggshell chorion gene amplification               | DNA binding                                 | LINS4* MTL5                  |
| <i>mira</i>                   | CG12249          | 0.0       | -1.2                          | 0.0                    | asymmetric protein localization                   | actin binding                               | -                            |
| <i>Mlp60A</i>                 | CG42309          | 1.3       | -0.3                          | 0.0                    | regulation of striated muscle development         | protein binding                             | CSRFP3 CSRFP2                |
| <i>Mmp1</i>                   | CG4859           | -0.6      | 0.0                           | -0.5                   | autophagic cell death                             | metalloendopeptidase activity               | MMP14 MMP24 MMP16            |
| <i>mod(mdg4)</i>              | CG32491          | -0.5      | 0.0                           | -0.6                   | regulation of chromatin assembly or disassembl    | protein binding                             | -                            |
| <i>Moe</i>                    | CG10701          | 0.0       | 0.5                           | -0.6                   | establishment or maintenance of epithelial cell a | protein binding                             | MSN RDX EZR                  |
| <i>mor</i>                    | CG18740          | 0.0       | 0.0                           | -0.9                   | chromatin remodeling                              | general RNA polymerase II transcription fat | -                            |
| <i>MRP</i>                    | CG6214           | 0.0       | 0.1                           | -1.0                   | transport                                         | ATPase activity, coupled to transmembrane   | ABCC1* ABCC3* ABCC4* ABCC12* |
| <i>Mrtf</i>                   | CG32296          | 0.0       | -0.1                          | -2.2                   | positive regulation of transcription, DNA-depend  | transcription activator activity            | MKL2 MKL1 MYOCD              |
| <i>Mus-300</i>                | CG33715          | -0.8      | 0.7                           | 0.2                    | cytoskeleton organization                         | cytoskeletal protein binding                | -                            |
| <i>Mst84Dc</i>                | CG17945          | 0.0       | -1.0                          | 0.0                    | -                                                 | iron-sulfur cluster binding                 | -                            |
| <i>mth3</i>                   | CG6530           | 0.1       | 0.8                           | 0.2                    | G-protein coupled receptor protein signaling pat  | G-protein coupled receptor activity         | GPR112                       |
| <i>mth4</i>                   | CG6536           | 0.0       | 0.7                           | 0.0                    | G-protein coupled receptor protein signaling pat  | G-protein coupled receptor activity         | -                            |
| <i>Mtk</i>                    | CG8175           | 0.0       | -1.8                          | 0.0                    | defense response to Gram-positive bacterium       | -                                           | -                            |
| <i>mud</i>                    | CG12047          | 0.0       | -1.0                          | 0.0                    | spindle assembly involved in female meiosis II    | steroid hormone receptor activity           | -                            |
| <i>mus101</i>                 | CG11156          | 0.0       | 0.0                           | -2.9                   | mitosis                                           | -                                           | TOPBP1 ECT2 ANKRD32          |
| <i>mXr</i>                    | CG30361          | 0.0       | 0.0                           | -3.0                   | G-protein signaling, coupled to IP3 second mess   | G-protein coupled receptor activity         | GRM8* GRM7* GRM2             |
| <i>Myo28B1</i>                | CG6976           | -0.8      | -0.7                          | -0.6                   | -                                                 | actin binding                               | MYO7A* MYO7B* MYO10          |
| <i>MYPT-75D</i>               | CG6896           | -0.1      | -0.1                          | -1.9                   | imaginal disc-derived wing morphogenesis          | myosin phosphatase regulator activity       | PPP1R16B PPP1R16A KIAA0823   |
| <i>NaPi-T</i>                 | CG10207          | 0.0       | -1.9                          | -1.1                   | phosphate transport                               | high affinity inorganic phosphate:sodium sy | SLC17A6 SLC17A7 SLC17A5      |
| <i>net</i>                    | CG11450          | 2.3       | 1.2                           | 2.2                    | regulation of transcription                       | RNA polymerase II transcription factor acti | ATOX8*                       |
| <i>NFAT</i>                   | CG11172          | -0.3      | -0.1                          | -1.4                   | transcription                                     | transcription factor activity               | NFAT5 NFATC3 NFATC2          |
| <i>nito</i>                   | CG2910           | 0.0       | 0.0                           | -3.0                   | regulation of transcription                       | mRNA binding                                | RBM15B RBM15 SPEN            |
| <i>noc</i>                    | CG4491           | -0.1      | 0.0                           | -2.6                   | regulation of transcription from RNA polymerase   | RNA polymerase II transcription factor acti | ZNF503*                      |
| <i>nompA</i>                  | CG13207          | 0.0       | 0.0                           | -2.0                   | dendrite morphogenesis                            | -                                           | -                            |
| <i>nos</i>                    | CG5637           | 0.4       | 0.0                           | 0.0                    | spermatogenesis                                   | protein binding                             | NANOS1 NANOS3 NANOS2         |
| <i>Nrk</i>                    | CG4007           | 0.0       | 0.2                           | -3.0                   | protein amino acid phosphorylation                | protein tyrosine kinase activity            | MUSK* ROR1 ROR2              |
| <i>Ntf-2r</i>                 | CG10174          | -0.5      | -0.1                          | 0.0                    | protein import into nucleus                       | -                                           | NUTF2                        |
| <i>nullo</i>                  | CG14426          | -0.9      | 0.0                           | 0.7                    | cell-cell junction assembly                       | actin binding                               | -                            |
| <i>Nup358</i>                 | CG11856          | 0.0       | 0.2                           | -1.5                   | intracellular transport                           | Ran GTPase binding                          | RANBP2 RGPD1 RGPD8           |
| <i>Nup98</i>                  | CG10198          | 0.0       | 0.1                           | -1.7                   | phagocytosis, engulfment                          | -                                           | NUP98                        |
| <i>Nup58Db</i>                | CG3382           | 0.0       | -0.7                          | -2.0                   | organic anion transport                           | organic anion transmembrane transporter z   | ALCO1C1 SLC05A1 SLC01B3      |
| <i>Oatp58Dc</i>               | CG3380           | -0.1      | 0.0                           | -0.9                   | organic anion transport                           | organic anion transmembrane transporter z   | SLC05A1 SLC04A1 SLC03A1      |
| <i>Obp50b</i>                 | CG30073          | 0.9       | -1.4                          | 0.0                    | sensory perception of chemical stimulus           | odorant binding                             | -                            |
| <i>Obp57c</i>                 | CG13421          | 0.0       | 0.0                           | -2.3                   | sensory perception of chemical stimulus           | odorant binding                             | -                            |
| <i>Obp57d</i>                 | CG30150          | -0.1      | 2.0                           | -0.6                   | sensory perception of chemical stimulus           | odorant binding                             | -                            |
| <i>ocn</i>                    | CG7929           | -1.0      | 0.0                           | 0.0                    | -                                                 | -                                           | -                            |
| <i>Oli</i>                    | CG5545           | 0.8       | 0.1                           | 0.3                    | regulation of transcription                       | transcription factor activity               | BHLHE23 OLIG2 OLIG3          |
| <i>Or43a</i>                  | CG1854           | 0.0       | -1.4                          | 0.0                    | sensory perception of smell                       | protein binding                             | -                            |
| <i>Or46a</i>                  | CG33478          | -0.4      | 0.0                           | -1.4                   | sensory perception of smell                       | olfactory receptor activity                 | -                            |
| <i>Or58a</i>                  | CG5540           | 0.0       | -2.7                          | -1.8                   | sensory perception of smell                       | olfactory receptor activity                 | -                            |
| <i>orb</i>                    | CG30688          | 0.0       | 0.1                           | 0.1                    | oocyte dorsal/ventral axis determination          | chloride channel activity                   | CEPB1* CEPB4 CEPB2           |
| <i>Orct</i>                   | CG6331           | 0.0       | -0.1                          | -1.0                   | apoptosis                                         | organic cation transmembrane transporter    | SLC22A5* SLC22A13 SLC22A4    |
| <i>Osbp</i>                   | CG6708           | 0.0       | 0.0                           | -1.7                   | steroid metabolic process                         | xysterol binding                            | OSBP* OSBP2 OSBP1            |
| <i>Oseg1</i>                  | CG7161           | 0.0       | 0.0                           | -1.5                   | sensory cilium biogenesis                         | -                                           | IFT122* WDR10 APAF1          |
| <i>Oseg3</i>                  | CG11838          | 0.0       | -0.3                          | -3.6                   | sensory cilium biogenesis                         | binding                                     | IFT140                       |
| <i>Osi10</i>                  | CG15593          | -1.9      | 0.0                           | 0.0                    | -                                                 | -                                           | -                            |
| <i>Osi7</i>                   | CG1153           | -1.9      | 0.0                           | 0.2                    | -                                                 | -                                           | -                            |
| <i>osm-1</i>                  | CG13809          | 0.2       | -0.7                          | 0.0                    | microtubule-based movement                        | microtubule motor activity                  | IFT172*                      |
| <i>ovo</i>                    | CG6824           | 0.0       | 0.0                           | 2.0                    | cuticle pattern formation                         | sequence-specific DNA binding               | OVOL1 OVOL2 MYNN             |
| <i>opt</i>                    | CG32300          | 0.0       | 0.0                           | -1.7                   | D-xylose metabolic process                        | protein xylosyltransferase activity         | XYLT1 XYLT2 GCNT2            |
| <i>p130CAS</i>                | CG1212           | -0.1      | 0.0                           | -2.2                   | cytoskeletal anchoring at plasma membrane         | -                                           | BCAR1 NEDD9 EFS              |
| <i>p53</i>                    | CG33336          | -0.6      | 0.0                           | 0.0                    | DNA damage response, signal transduction by p     | transcription factor activity               | -                            |
| <i>Pbprp1</i>                 | CG10436          | 0.1       | -0.1                          | 2.4                    | sensory perception of chemical stimulus           | phenylalkylamine binding                    | -                            |
| <i>pcrn</i>                   | CG3291           | 0.0       | 0.0                           | -1.8                   | RNA catabolic process                             | 5'-3' exoribonuclease activity              | XRN1* XRN2                   |
| <i>Pde6</i>                   | CG8279           | 0.0       | 0.0                           | -2.3                   | signal transduction                               | 3',5'-cyclic-GMP phosphodiesterase activity | PDE11A* PDE5A PDE6C          |
| <i>Pde9</i>                   | CG42276          | -0.1      | 2.2                           | 0.0                    | microtubule-based process                         | 3',5'-cyclic-GMP phosphodiesterase activity | PDE9A* PDE4D PDE4C           |
| <i>Pepck</i>                  | CG17725          | -0.3      | -0.4                          | -1.5                   | gluconeogenesis                                   | phosphoenolpyruvate carboxykinase (GTP)     | PCK2 PCK1                    |
| <i>per</i>                    | CG2647           | 0.0       | 0.0                           | -2.2                   | mating behavior                                   | transcription cofactor activity             | PER3 PER1 PER2               |
| <i>Peritrophin-15l</i>        | CG31893          | -2.1      | 0.9                           | -1.2                   | chitin metabolic process                          | chitin binding                              | -                            |
| <i>PERP-LB</i>                | CG14704          | 0.0       | -0.7                          | -0.6                   | detection of bacterium                            | peptidoglycan binding                       | PGLYRP3 PGLYRP4 PGLYRP2      |
| <i>PGRP-SB1</i>               | CG3681           | -1.8      | -0.9                          | 0.0                    | immune response                                   | peptidoglycan binding                       | PGLYRP3 PGLYRP4 PGLYRP1      |
| <i>phC1</i>                   | CG33989          | -0.1      | -0.1                          | 2.8                    | ion transport                                     | chloride channel activity                   | GLRA3 GLRA1 GLRA4            |
| <i>P1P5K59B</i>               | CG3682           | -2.1      | -0.1                          | 0.0                    | phosphorylation                                   | 1-phosphatidylinositol-4-phosphate 5-kinas  | PIPSK1A PIP5K1C PIP5K1B      |
| <i>pk</i>                     | CG11084          | 0.1       | -1.7                          | 0.0                    | establishment of ommatidial polarity              | protein binding                             | -                            |
| <i>Pkc53E</i>                 | CG6622           | 0.2       | 0.0                           | 2.2                    | protein amino acid phosphorylation                | protein kinase C activity                   | PRKCB* PRKCA PRKCE           |
| <i>Pmm45A</i>                 | CG8073           | 0.0       | 0.0                           | -1.1                   | carbohydrate metabolic process                    | phosphomannomutase activity                 | PGM2L1 PGM2                  |
| <i>PNUTS</i>                  | CG33526          | 0.0       | 0.0                           | -1.9                   | protein targeting                                 | protein phosphatase regulator activity      | PPP1R10                      |
| <i>polybromo</i>              | CG11375          | 0.0       | 0.0                           | -1.6                   | -                                                 | DNA binding                                 | PBRM1* ASH1L SMARCA2         |
| <i>Pp2C1</i>                  | CG2984           | -0.1      | 0.0                           | -2.4                   | protein amino acid dephosphorylation              | protein serine/threonine phosphatase activi | PPM1D PPM1K PPM1E            |
| <i>ppa</i>                    | CG9952           | -0.1      | -0.5                          | -2.1                   | ubiquitin-dependent protein catabolic process     | protein binding                             | FBXL14 FBXL2 FBXL7           |
| <i>ppk12</i>                  | CG10972          | -0.3      | 0.0                           | -2.6                   | sodium ion transport                              | sodium channel activity                     | ACCN1* ACCN3 ACCN4           |
| <i>ppk28</i>                  | CG4905           | 0.0       | -0.7                          | -1.1                   | sodium ion transport                              | sodium channel activity                     | ACCN2 ACCN1 ACCN3            |
| <i>Ppn</i>                    | CG33103          | 0.0       | 0.0                           | -2.1                   | extracellular matrix organization                 | extracellular matrix structural constituent | PAPLN* ADAMT56 ADAMT58       |
| <i>Prosap</i>                 | CG30483          | -0.2      | 0.0                           | -2.0                   | -                                                 | protein binding                             | -                            |
| <i>Psa</i>                    | CG1009           | 0.0       | 0.0                           | -1.0                   | proteolysis                                       | aminopeptidase activity                     | NPEPPS ENPEP ERAP2           |
| <i>Pten</i>                   | CG5671           | 0.0       | 0.0                           | 1.0                    | sequestering of lipid                             | non-membrane spanning protein tyrosine p    | -                            |



| <i>D. melanogaster</i> |           |      | Fold Change (log2) |      | Gene Ontologies                                    |                                              | <i>H. sapiens</i>           |              |
|------------------------|-----------|------|--------------------|------|----------------------------------------------------|----------------------------------------------|-----------------------------|--------------|
| Gene Name              | CG number | 2h   | 4h                 | 10h  | Biological Process                                 | Molecular Function                           | Gene Name                   |              |
| <i>Ptp99A</i>          | CG11516   | -0.2 | -1.0               | 0.0  | protein amino acid dephosphorylation               | transmembrane receptor protein tyrosine p    | PTPRG*                      | PTPRZ1 PTPRD |
| <i>ptr</i>             | CG2841    | -1.3 | -0.1               | 0.0  | -                                                  | -                                            | -                           | -            |
| <i>Pvf1</i>            | CG7103    | 0.0  | 0.0                | -1.5 | border follicle cell migration                     | receptor binding                             | PDGFA*                      | -            |
| <i>Pvr</i>             | CG8222    | 0.0  | 0.4                | -1.2 | border follicle cell migration                     | protein tyrosine kinase activity             | PDGFRB FLT1 FGFR3           | -            |
| <i>Pxb</i>             | CG33207   | -0.7 | -0.8               | 0.0  | smoothed signaling pathway                         | -                                            | -                           | -            |
| <i>Pxn</i>             | CG12002   | 0.0  | 0.0                | -1.8 | response to oxidative stress                       | peroxidase activity                          | PXDN* PXDNL* TPO            | -            |
| <i>Rab27</i>           | CG14791   | 0.0  | 0.0                | -2.2 | regulation of transcription, DNA-dependent         | GTP binding                                  | RAB27A* RAB27B RAB8B        | -            |
| <i>rad</i>             | CG15720   | 0.1  | -1.5               | 0.0  | olfactory learning                                 | phospholipase A2 activity                    | PLA2G3                      | -            |
| <i>Ranbp21</i>         | CG12234   | 0.0  | 0.0                | -1.8 | protein import into nucleus, docking               | Ran GTPase binding                           | XPO5*                       | -            |
| <i>Rbp1</i>            | CG17136   | -0.1 | -3.2               | 0.0  | nuclear mRNA splicing, via spliceosome             | mRNA binding                                 | SFRS7 SFRS3 RBM4B           | -            |
| <i>rdgA</i>            | CG34344   | 0.0  | -1.9               | 0.0  | deactivation of rhodopsin mediated signaling       | diacylglycerol kinase activity               | DGK2* DGK1 DGKB             | -            |
| <i>Rfx</i>             | CG6312    | 0.0  | -0.1               | -3.5 | nervous system development                         | RNA polymerase II transcription factor acti  | RFX3* RFX2 RFX1             | -            |
| <i>Rgh1</i>            | CG9811    | 0.0  | -0.6               | -0.1 | small GTPase mediated signal transduction          | GTPase activity                              | RRAD GEM REM1               | -            |
| <i>Rgh2</i>            | CG34390   | 0.0  | 0.0                | -2.7 | small GTPase mediated signal transduction          | GTP binding                                  | RRAD GEM REM1               | -            |
| <i>Rgl</i>             | CG8865    | 0.0  | -0.3               | -1.6 | regulation of small GTPase mediated signal trans   | Ral quanyl-nucleotide exchange factor acti   | RGL1* RALGDS RGL2           | -            |
| <i>rho</i>             | CG1004    | -0.1 | -0.7               | -1.5 | imaginal disc-derived wing vein specification      | serine-type peptidase activity               | RHBDL3 RHBDL1 RHBDL2        | -            |
| <i>RhoBTB</i>          | CG5701    | 0.0  | 0.0                | -1.1 | small GTPase mediated signal transduction          | GTPase activity                              | RHOBTB1 RHOBTB2 RHOBTB3     | -            |
| <i>RhoGAP71E</i>       | CG32149   | 0.0  | 0.0                | -2.1 | signal transduction                                | magnesium ion binding                        | ARHGAP20* TAGAP             | -            |
| <i>rictor</i>          | CG8002    | 0.0  | 0.0                | -2.1 | signal transduction                                | binding                                      | RICTOR*                     | -            |
| <i>Rip11</i>           | CG6506    | 0.0  | -0.2               | -1.6 | rhabdome development                               | -                                            | -                           | -            |
| <i>Rm62</i>            | CG10279   | 0.0  | 0.2                | -0.5 | RNA interference                                   | ATP-dependent helicase activity              | DDX17* DDX5 DDX42           | -            |
| <i>RN-tre</i>          | CG8085    | 0.0  | -0.5               | 0.0  | regulation of Rab GTPase activity                  | Rab GTPase activator activity                | USP6NL RABGAP1L RABGAP1     | -            |
| <i>robl22E</i>         | CG10838   | 0.0  | -0.9               | 0.0  | microtubule-based movement                         | ATPase activity, coupled                     | DYNLRB1 DYNLRB2             | -            |
| <i>robl62A</i>         | CG1014    | 0.0  | 0.0                | 2.4  | microtubule-based movement                         | ATPase activity, coupled                     | -                           | -            |
| <i>Rpb4</i>            | CG33520   | -0.2 | -0.2               | -2.0 | transcription from RNA polymerase II promoter      | histone acetyltransferase activity           | TADA2L TADA2B               | -            |
| <i>Rpl1215</i>         | CG1554    | 0.0  | 0.0                | -1.2 | transcription from RNA polymerase II promoter      | DNA-directed RNA polymerase activity         | POLR2A POLR3A POLR1A        | -            |
| <i>Rpn2</i>            | CG11888   | 0.0  | 0.1                | -1.0 | proteolysis                                        | endopeptidase activity                       | PSMD1*                      | -            |
| <i>rut</i>             | CG9533    | 0.0  | 0.0                | -2.2 | neuromuscular synaptic transmission                | adenylate cyclase activity                   | ADCY1 ADCY5 ADCY6           | -            |
| <i>ry</i>              | CG15848   | 0.0  | 0.0                | -2.5 | determination of adult life span                   | xanthine dehydrogenase activity              | XDH AOX1                    | -            |
| <i>SG6II</i>           | CG17596   | 0.0  | 0.0                | -1.7 | associative learning                               | ribosomal protein S6 kinase activity         | RPS6K2* RPS6KA3 RPS6KA1     | -            |
| <i>Sac1</i>            | CG9128    | 0.0  | 0.0                | -1.1 | dorsal closure                                     | polyphosphoinositide phosphatase activity    | SACM1L INPP5F SYNJ1         | -            |
| <i>salr</i>            | CG4881    | 2.6  | 0.0                | 0.0  | antennal joint development                         | specific RNA polymerase II transcription fac | SALL1 SALL3 SALL4           | -            |
| <i>Samuel</i>          | CG31868   | -0.5 | 0.0                | -2.9 | spermatogenesis                                    | -                                            | SAMD11* SAMD7 PHC3          | -            |
| <i>sav</i>             | CG33193   | 0.0  | 0.0                | -1.3 | regulation of multicellular organism growth        | protein binding                              | SAV1                        | -            |
| <i>sbb</i>             | CG5580    | 0.0  | 0.0                | -2.3 | axon target recognition                            | transcription factor activity                | ZNF608 ZNF609               | -            |
| <i>sca</i>             | CG17579   | -0.1 | 0.0                | 1.4  | bristle morphogenesis                              | signal transducer activity                   | MFAF4 TNXB ANGPTL1          | -            |
| <i>scarface</i>        | CG11066   | -1.3 | 0.0                | -0.8 | proteolysis                                        | serine-type endopeptidase activity           | KLKB1 TMPRSS9 F11           | -            |
| <i>scat</i>            | CG3766    | 0.0  | 0.0                | -1.9 | spermatid development                              | protein binding                              | VPS54*                      | -            |
| <i>Scp1</i>            | CG15848   | 0.0  | -2.2               | 0.1  | -                                                  | calcium ion binding                          | -                           | -            |
| <i>scro</i>            | CG17594   | -1.2 | 0.8                | 0.0  | regulation of transcription, DNA-dependent         | DNA binding                                  | -                           | -            |
| <i>scrt</i>            | CG1130    | 0.0  | 0.0                | -2.5 | regulation of transcription                        | transcription factor activity                | NKX2-1 TITF1 NKX2-4         | -            |
| <i>scyl</i>            | CG7590    | -0.5 | 0.0                | 0.0  | negative regulation of growth                      | -                                            | SCR1 SCR2 SNAI2             | -            |
| <i>sd</i>              | CG32717   | 0.3  | -1.7               | 0.0  | establishment or maintenance of neuroblast pole    | guanylate kinase activity                    | DDIT4L                      | -            |
| <i>sec31</i>           | CG8266    | 0.0  | 0.0                | -1.2 | -                                                  | -                                            | MPP5 MPP7 MPP2              | -            |
| <i>shd</i>             | CG13478   | -0.7 | 0.0                | 0.0  | dorsal closure                                     | electron carrier activity                    | SEC31A SEC31B               | -            |
| <i>shn</i>             | CG7734    | -0.6 | 0.0                | 0.0  | ectoderm development                               | transcription factor activity                | CYP24A1 CYP27A1 CYP24       | -            |
| <i>shot</i>            | CG18076   | 0.0  | 0.0                | -0.9 | muscle attachment                                  | cytoskeletal protein binding                 | HIVEP2 HIVEP1 HIVEP3        | -            |
| <i>shrd</i>            | CG9198    | 0.0  | 0.0                | -2.2 | -                                                  | -                                            | PLEC1* MACF1 DST            | -            |
| <i>shij</i>            | CG32067   | 0.0  | 0.0                | -4.1 | neagative regulation of transcription, DNA-depen   | transcription repressor activity             | ANAPC1                      | -            |
| <i>slp2</i>            | CG5164    | -0.1 | -2.2               | 0.0  | -                                                  | -                                            | GATAD2B GATAD2A             | -            |
| <i>slp2</i>            | CG2939    | 0.0  | 1.5                | 0.0  | regulation of transcription                        | RNA polymerase II transcription factor acti  | FOXG1 FOXL2 FOXC2           | -            |
| <i>sls</i>             | CG1915    | -1.6 | -2.2               | 0.0  | myoblast fusion                                    | myosin light chain kinase activity           | TTN HMCN1 DKFZp451F042      | -            |
| <i>Smg1</i>            | CG32743   | 0.0  | 0.0                | -2.0 | phosphorylation                                    | protein kinase activity                      | SMG1* FRAP1 ATR             | -            |
| <i>SNF1A</i>           | CG3051    | 0.0  | 0.0                | -1.1 | establishment or maintenance of epithelial cell a  | G-protein coupled receptor kinase activity   | PKRAA2 PRKAA1 SIK2          | -            |
| <i>sob</i>             | CG3242    | 2.0  | -2.4               | 0.2  | regulation of transcription                        | RNA polymerase II transcription factor acti  | OSR2 OSR1 ZNF276            | -            |
| <i>Socs36E</i>         | CG15154   | 1.8  | 2.2                | 1.2  | regulation of JAK-STAT cascade                     | protein binding                              | SOC5 SOC4 SOC56             | -            |
| <i>sol</i>             | CG1391    | 0.0  | 0.0                | -2.8 | visual behavior                                    | calcium-dependent cysteine-type endopept     | SOLH* CAPN5 CAPN8           | -            |
| <i>Sop2</i>            | CG8978    | 0.0  | 0.0                | -0.7 | actin filament polymerization                      | actin binding                                | ARPC1A ARPC1B               | -            |
| <i>Sox21b</i>          | CG32139   | 0.0  | 0.0                | -3.2 | regulation of transcription                        | DNA bending activity                         | SOX21 SOX14 SOX2            | -            |
| <i>SP1070</i>          | CG9138    | -1.9 | 0.4                | 0.0  | cell adhesion                                      | Notch binding                                | NOTCH2 NOTCH1 NOTCH3        | -            |
| <i>SP1173</i>          | CG10121   | -0.3 | -0.1               | 2.8  | -                                                  | -                                            | -                           | -            |
| <i>spas</i>            | CG5977    | -0.2 | -0.2               | -1.8 | positive regulation of microtubule depolymerizat   | ATPase activity                              | SPAST* FIGNL1 KATNA1        | -            |
| <i>spin</i>            | CG8428    | 0.0  | 0.0                | -0.9 | regulation of synaptic growth at neuromuscular     | tetracycline:hydrogen antiporter activity    | SPNS1* SPNS2 SPNS3          | -            |
| <i>spir</i>            | CG10076   | 0.0  | -1.0               | 0.0  | pole plasm RNA localization                        | microtubule binding                          | SPIRE1* SPIRE2 DKFZp4340034 | -            |
| <i>sPLA2</i>           | CG11124   | -0.2 | 0.0                | -2.3 | phospholipid metabolic process                     | phospholipase A2 activity                    | SGPL1                       | -            |
| <i>Sply</i>            | CG8946    | 0.0  | 0.0                | -0.9 | sphingolipid catabolic process                     | sphinganine-1-phosphate aldolase activity    | -                           | -            |
| <i>Spn</i>             | CG16757   | -0.1 | 0.0                | -2.1 | olfactory behavior                                 | protein phosphatase 1 binding                | -                           | -            |
| <i>Spp</i>             | CG11840   | -0.1 | 0.1                | -0.4 | open tracheal system development                   | aspartic endopeptidase activity, intramemb   | HM13* SPPL3 SPPL2A          | -            |
| <i>spr1</i>            | CG34414   | 0.0  | 0.0                | -1.9 | border follicle cell migration                     | Ras GTPase binding                           | RIN2* RIN3 RIN1             | -            |
| <i>spr2</i>            | CG33823   | -0.5 | 0.0                | -1.9 | larval heart development                           | protein binding                              | -                           | -            |
| <i>Spt6</i>            | CG12225   | 0.0  | 0.0                | -2.0 | RNA elongation                                     | chromatin binding                            | SUPT6H*                     | -            |
| <i>Srm160</i>          | CG11274   | 0.0  | 0.0                | -1.5 | translation                                        | structural constituent of ribosome           | SRRM1*                      | -            |
| <i>Sry-beta</i>        | CG7938    | 0.0  | -0.1               | -4.3 | -                                                  | DNA binding                                  | ZNF764 ZNF57 ZNF250         | -            |
| <i>stc</i>             | CG3647    | 0.0  | 0.0                | -1.2 | regulation of transcription                        | RNA polymerase II transcription factor acti  | NFX1* NFX1L                 | -            |
| <i>stg</i>             | CG1395    | 0.0  | 0.0                | -1.1 | G2/M transition of mitotic cell cycle              | protein tyrosine phosphatase activity        | CDC25B* CDC25C* CDC25A      | -            |
| <i>Strn-Mlck</i>       | CG18255   | -0.4 | 0.0                | -2.0 | protein amino acid phosphorylation                 | myosin light chain kinase activity           | MYLK* MYLK2 MYLK3           | -            |
| <i>sty</i>             | CG1921    | 0.0  | 0.0                | -1.5 | muscle fiber development                           | -                                            | SPRY3 SPRY4 SPRY1           | -            |
| <i>Su(Tp1)</i>         | CG32217   | 0.0  | 0.0                | -1.8 | wing disc dorsal/ventral pattern formation         | transcription elongation regulator activity  | ELL ELL2 DKFZp779C185       | -            |
| <i>Su(z)12</i>         | CG8013    | 0.0  | 0.0                | -1.2 | chromatin silencing                                | DNA binding                                  | SUZ12                       | -            |
| <i>sub4</i>            | CG1380    | 0.0  | 2.1                | 0.0  | transmembrane transport                            | sugar:hydrogen symporter activity            | SLC2A8 SLC2A6 SLC2A1        | -            |
| <i>syd</i>             | CG9138    | -1.9 | 0.4                | 0.0  | axon cargo transport                               | kinesin binding                              | MARK8BP3* SPAG9 ARHGEF17    | -            |
| <i>Syn2</i>            | CG4905    | 0.1  | -1.5               | 0.0  | -                                                  | structural constituent of muscle             | SNTG1 SNTG2 SNTB1           | -            |
| <i>synj</i>            | CG6562    | 0.0  | 0.0                | -1.0 | dephosphorylation                                  | inositol trisphosphate phosphatase activity  | SYNJ1* SYNJ2* INPP5B        | -            |
| <i>Syt7</i>            | CG2381    | 0.1  | -1.3               | 0.0  | neurotransmitter secretion                         | calcium-dependent phospholipid binding       | SYT7 SYT2 SYT1              | -            |
| <i>Taf12L</i>          | CG15632   | 2.6  | 0.0                | 0.0  | transcription initiation from RNA polymerase II p  | general RNA polymerase II transcription fac  | -                           | -            |
| <i>tai</i>             | CG13109   | 0.0  | -0.3               | -2.0 | border follicle cell migration                     | transcription coactivator activity           | -                           | -            |
| <i>Takr99D</i>         | CG7887    | 2.4  | 0.0                | 0.0  | G-protein coupled receptor protein signaling pati  | neuropeptide receptor activity               | TACR3 TACR1 TACR2           | -            |
| <i>tam</i>             | CG8987    | 0.0  | 0.0                | -2.0 | DNA-dependent DNA replication                      | DNA-directed DNA polymerase activity         | POLG                        | -            |
| <i>tamo</i>            | CG4057    | 0.0  | -0.2               | -1.9 | neagative regulation of protein import into nucleu | nuclear localization sequence binding        | -                           | -            |
| <i>TepIV</i>           | CG10363   | 0.0  | 0.0                | -1.2 | antibacterial humoral response                     | protease inhibitor activity                  | CD109 A2M1L P2P             | -            |
| <i>Thor</i>            | CG5986    | -0.6 | 0.0                | 0.0  | immune response                                    | eukaryotic initiation factor 4E binding      | EIF4EBP2 EIF4EBP1 EIF4EBP3  | -            |
| <i>Tim17b2</i>         | CG15257   | 0.0  | 0.1                | 2.1  | protein transport                                  | P-P-bond-hydrolysis-driven protein transm    | TIMM17A TIMM17B             | -            |
| <i>tio</i>             | CG12630   | 0.0  | 0.0                | -2.2 | epidermis morphogenesis                            | transcription factor activity                | -                           | -            |
| <i>Tk</i>              | CG14734   | 0.0  | 0.1                | 2.2  | neuropeptide signaling pathway                     | receptor binding                             | -                           | -            |
| <i>Tm1</i>             | CG4898    | -0.8 | 0.0                | -0.1 | pole plasm oskar mRNA localization                 | actin binding                                | TPM1 TPM3 TPM2              | -            |
| <i>tna</i>             | CG7958    | 0.0  | 0.0                | -1.7 | chromatin-mediated maintenance of transcriptio     | zinc ion binding                             | ZMIZ1* ZMIZ2 PIAS2          | -            |
| <i>toe</i>             | CG10704   | 0.0  | 0.0                | 1.4  | regulation of transcription                        | transcription factor activity                | PAX2 PAX8 PAX5              | -            |
| <i>tombboy40</i>       | CG8330    | 0.0  | 0.1                | -2.1 | protein targeting to mitochondrion                 | P-P-bond-hydrolysis-driven protein transm    | TOMM40 TOMM40L              | -            |
| <i>Top3alpha</i>       | CG10123   | 0.0  | 0.0                | -2.4 | double-strand break repair via homologous reco     | DNA topoisomerase type I activity            | TOP3A* TOP3B                | -            |
| <i>tor</i>             | CG8484    | 0.0  | 0.0                | -3.1 | male meiosis                                       | DNA binding                                  | ZNF629 ZFP2 ZNF311          | -            |
| <i>TotA</i>            | CG1389    | 0.0  | 0.0                | -2.2 | terminal region determination                      | transmembrane receptor protein tyrosine k    | RET/PTC2 FGFR1 RET          | -            |
| <i>TotM</i>            | CG1509    | 0.0  | 1.1                | 4.1  | response to stress                                 | -                                            | -                           | -            |
| <i>TppII</i>           | CG3991    | 0.0  | 0.0                | -1.2 | response to stress                                 | -                                            | -                           | -            |
| <i>tral</i>            | CG10686   | 0.0  | 0.0                | -1.2 | proteolysis                                        | exopeptidase activity                        | PPP2                        | -            |
| <i>Trax</i>            | CG5063    | 0.0  | -0.7               | 0.0  | ER to Golgi vesicle-mediated transport             | -                                            | LSM14B* LSM14A              | -            |
| <i>Trc8</i>            | CG2304    | 0.0  | 0.0                | -2.1 | -                                                  | sequence-specific DNA binding                | TSNAX                       | -            |
| <i>trn</i>             | CG11280   | 0.1  | 1.3                | -0.1 | negative regulation of growth                      | protein binding                              | RNF139 RNF145 SYVN1         | -            |
| <i>trr</i>             | CG3848    | 0.0  | 0.0                | -2.3 | cell adhesion                                      | protein binding                              | LRN2 LRN3 LRIG3             | -            |
| <i>Tsp29Fb</i>         | CG9496    | 0.0  | -0.4               | 1.9  | histone methylation                                | histone lysine N-methyltransferase activity  | MLL3* MLL2 MLL              | -            |
| <i>Uba1</i>            | CG1782    | 0.0  | 0.0                | -1.0 | -                                                  | -                                            | TSPAN6 CD63 TSPAN33         | -            |
| <i>Ubp64E</i>          | CG5946    | 0.0  | 0.0                | -1.3 | neuron remodeling                                  | ubiquitin activating enzyme activity         | UBA6* UBA1 UBA7             | -            |
| <i>Ucp4A</i>           | CG6492    | 0.0  | -0.5               | -2.9 | proteolysis                                        | proteolysis                                  | USP47* USP7 USP40           | -            |
| <i>unc</i>             | CG1501    | 0.0  | -0.1               | -2.2 | proton transport                                   | oxidative phosphorylation uncoupler activi   | SLC25A27 SLC25A30 SLC25A14  | -            |
| <i>unc-5</i>           | CG8166    | -0.2 | -0.6               | -1.7 | locomotory behavior                                | -                                            | -                           | -            |
| <i>unc-76</i>          | CG3981    | 0.0  | 0.0                | -1.1 | axon guidance                                      | netrin receptor activity                     | UNC5C* UNC5B UNC5D          | -            |
|                        |           |      |                    |      | axon cargo transport                               | kinesin binding                              | -                           | -            |

| <i>D. melanogaster</i> |           |      |      | Fold Change (log2) |                                                 | Gene Ontologies                             |           | <i>H. sapiens</i> |           |
|------------------------|-----------|------|------|--------------------|-------------------------------------------------|---------------------------------------------|-----------|-------------------|-----------|
| Gene Name              | CG number | 2h   | 4h   | 10h                | Biological Process                              | Molecular Function                          | Gene Name |                   |           |
| <i>Upf1</i>            | CG1559    | 0.0  | 0.0  | -1.9               | nuclear-transcribed mRNA catabolic process, nor | helicase activity                           | UPF1*     | IGHMBP2           | SETX      |
| <i>Usp36</i>           | CG5505    | 0.0  | 0.0  | -1.7               | molting cycle, chitin-based cuticle             | ubiquitin thiolesterase activity            | USP36*    | USP42             | USP17A    |
| <i>ventrally-expre</i> | CG33200   | 0.0  | -0.9 | 1.5                | multicellular organismal development            | -                                           | -         | -                 | -         |
| <i>Vha100-2</i>        | CG18617   | 0.0  | 0.0  | -1.2               | ATP synthesis coupled proton transport          | hydrogen-exporting ATPase activity, phospt  | ATP6V0A1* | ATP6V0A4          | ATP6V0A2  |
| <i>Vha55</i>           | CG17369   | 0.0  | 0.0  | -0.9               | proton transport                                | hydrogen-exporting ATPase activity, phospt  | ATP6V1B2  | ATP6V1B1          | ATP5B     |
| <i>VhaPPA1-1</i>       | CG7007    | 0.0  | 0.1  | -0.8               | mitotic spindle organization                    | hydrogen-exporting ATPase activity, phospt  | ATP6V0B   | -                 | -         |
| <i>vkg</i>             | CG16858   | 0.0  | 0.0  | -2.4               | -                                               | extracellular matrix structural constituent | COL4A6    | COL4A2            | COL4A1    |
| <i>w</i>               | CG2759    | 0.0  | -1.1 | 0.2                | eye pigment precursor transport                 | ATPase activity, coupled to transmembrane   | ABCG1     | ABCG4             | ABCG2     |
| <i>wb</i>              | CG15288   | -1.7 | 0.0  | 0.0                | cell-cell signaling                             | binding                                     | LAMA1     | LAMA2             | LAMA3     |
| <i>wdn</i>             | CG1454    | 0.0  | 0.0  | -1.6               | regulation of transcription, DNA-dependent      | RNA polymerase II transcription factor acti | ZNF836    | ZNF668            | ZNF184    |
| <i>Wnt4</i>            | CG4698    | 2.2  | -1.5 | 0.0                | Wnt receptor signaling pathway                  | signal transducer activity                  | WNT9B     | WNT9A             | WNT16     |
| <i>woc</i>             | CG5965    | 0.0  | 0.0  | -1.1               | telomere capping                                | zinc ion binding                            | ZMYM3*    | ZMYM4             | QRICH1    |
| <i>xmas-1</i>          | CG32561   | 0.0  | 0.0  | -4.3               | embryonic development                           | -                                           | -         | -                 | -         |
| <i>XNP</i>             | CG4548    | 0.0  | 0.0  | -1.3               | transcription                                   | DNA helicase activity                       | RAD54L2   | ATR               | RAD54L    |
| <i>yemalpha</i>        | CG14513   | 0.0  | 0.0  | -2.5               | oogenesis                                       | DNA binding                                 | UBN1*     | UBN2              | -         |
| <i>yin</i>             | CG2913    | 0.0  | -0.6 | -1.0               | oligopeptide transport                          | proton-dependent oligopeptide secondary a   | SLC15A2   | SLC15A1           | hPEPT1-RF |

Supplemental Table 2

| Gene name              |                     | Cellular Proliferation |         |           |         |           |         |      |
|------------------------|---------------------|------------------------|---------|-----------|---------|-----------|---------|------|
|                        |                     | HeLa                   |         | Hek293T   |         | HepG2     |         |      |
| <i>D. melanogaster</i> | <i>Homo sapiens</i> | % of ctrl              | Z-score | % of ctrl | Z-score | % of ctrl | Z-score |      |
| <i>baz</i>             | PARD3               | 86.8%                  | 0.56    | 107.0%    | -1.26   | 102.0%    | -0.18   |      |
|                        | PARD3B              | 112.5%                 | -0.55   | 110.5%    | -1.85   | 106.5%    | -0.58   |      |
|                        | MPDZ                | 119.0%                 | -0.81   | 99.7%     | 0.06    | 96.3%     | 0.39    |      |
| <i>CG13559</i>         | LITAF               | 99.8%                  | 0.01    | 100.2%    | 0.00    | 96.0%     | 0.35    |      |
| <i>CG31158</i>         | PSD3                | 109.5%                 | -0.42   | 104.0%    | -0.67   | 102.5%    | -0.37   |      |
|                        | PSD                 | 82.0%                  | 0.77    | 97.8%     | 0.38    | 95.3%     | 0.46    |      |
|                        | PSD2                | 131.5%                 | -1.33   | 102.0%    | -0.36   | 93.0%     | 0.55    |      |
| <i>CG3829</i>          | SCARB1              | 142.5%                 | -1.83   | 102.0%    | -0.39   | 95.6%     | 0.47    |      |
|                        | SCARB2              | 86.8%                  | 0.56    | 94.2%     | 1.01    | 104.5%    | -0.38   |      |
|                        | CD36                | 108.0%                 | -0.34   | 105.5%    | -0.92   | 105.0%    | -0.48   |      |
| <i>CG4793</i>          | TMPRSS13            | 127.0%                 | -1.15   | 102.5%    | -0.43   | 114.5%    | -1.16   |      |
|                        | KLKB1               | 86.7%                  | 0.57    | 98.7%     | 0.23    | 92.0%     | 0.79    |      |
|                        | CTRB2               | 59.6%                  | 1.72    | 98.0%     | 0.33    | 96.0%     | 0.35    |      |
| <i>CG4080</i>          | MARCH8              | 125.0%                 | -1.08   | 97.4%     | 0.45    | 102.0%    | -0.19   |      |
|                        | MARCH2              | 49.4%                  | 2.15    | 83.0%     | 2.99    | 102.2%    | -0.29   |      |
|                        | MARCH1              | 89.0%                  | 0.47    | 98.9%     | 0.16    | 93.4%     | 0.66    |      |
| <i>CG4804</i>          | PAI-2               | 95.2%                  | 0.2     | 107.0%    | -1.20   | 111.5%    | -1.17   |      |
|                        | SERPINI1            | 56.2%                  | 1.86    | 84.5%     | 2.71    | 68.4%     | 3.18    |      |
|                        | SERPINB8            | 71.4%                  | 1.22    | 94.1%     | 1.03    | 90.1%     | 1.19    |      |
| <i>CG6014</i>          | REG1A               | 125.0%                 | -1.07   | 109.0%    | -1.54   | 108.0%    | -0.93   |      |
| <i>Ga73B</i>           | GNAL                | 124.5%                 | -1.03   | 104.0%    | -0.66   | 117.5%    | -1.81   |      |
|                        | GNAS                | 108.4%                 | -0.34   | 101.5%    | -0.27   | 111.0%    | -1.06   |      |
|                        | <i>idgf1</i>        | CHIT1                  | 48.6%   | 2.19      | 92.1%   | 1.39      | 89.4%   | 1.10 |
| <i>l(2)gl</i>          | CHI3L2              | 95.6%                  | 0.19    | 94.0%     | 1.06    | 87.1%     | 1.10    |      |
|                        | CHIA                | 81.8%                  | 0.78    | 102.0%    | -0.31   | 91.1%     | 0.96    |      |
|                        | LLGL1               | 56.6%                  | 1.85    | 88.4%     | 2.02    | 87.5%     | 1.32    |      |
| <i>mfas</i>            | LLGL2               | 100.4%                 | -0.02   | 99.3%     | 0.16    | 96.6%     | 0.47    |      |
|                        | STXBP5              | 101.4%                 | -0.06   | 97.9%     | 0.41    | 99.0%     | 0.07    |      |
|                        | TGFBI               | 110.5%                 | -0.43   | 101.6%    | -1.21   | 99.9%     | 1.40    |      |
| <i>mthl3</i>           | POSTN               | 121.0%                 | -0.89   | 103.0%    | -0.51   | 90.9%     | 0.90    |      |
|                        | GPR112              | 22.6%                  | 3.29    | 92.6%     | 0.15    | 75.4%     | 0.13    |      |
| <i>net</i>             | ATOH8               | 95.6%                  | 0.19    | 94.6%     | 0.94    | 104.0%    | -0.45   |      |
|                        | <i>socs36e</i>      | SOCS5                  | 104.0%  | -0.17     | 101.0%  | -0.15     | 98.4%   | 0.13 |
|                        | SOCS4               | 121.0%                 | -0.89   | 98.4%     | 0.29    | 102.2%    | -0.20   |      |
| <i>Wnt4</i>            | SOCS6               | 124.5%                 | -1.04   | 105.5%    | -0.88   | 103.5%    | -0.36   |      |
|                        | WNT9A               | 124.0%                 | -1.02   | 101.0%    | -0.15   | 114.5%    | -1.45   |      |
|                        | WNT9B               | 80.4%                  | 0.83    | 104.5%    | -0.73   | 109.0%    | -0.92   |      |
|                        | WNT16               | 75.6%                  | 1.04    | 88.9%     | 1.94    | 98.9%     | 0.10    |      |

### Supplemental Table 3

| Comparison Screen                                             | Gene Name                      |              | Alignment e-value       |
|---------------------------------------------------------------|--------------------------------|--------------|-------------------------|
|                                                               | <i>Drosophila melanogaster</i> | Homo sapiens |                         |
| Li <i>et al.</i> , 2007<br>(lung tissue from transgenic mice) | <i>CG10924</i>                 | PCK1         | 0.0                     |
|                                                               | <i>Egfr</i>                    | ERBB4        | 1.0 x10 <sup>-119</sup> |
|                                                               | <i>shot</i>                    | DST          | 1.0 x10 <sup>-110</sup> |
|                                                               | <i>bru-2</i>                   | CUGBP2       | 1.0 x10 <sup>-69</sup>  |
|                                                               | <i>Rab27</i>                   | RAB27A       | 4.0 x10 <sup>-64</sup>  |
|                                                               | <i>Cht2</i>                    | CHI3L1       | 1.0 x10 <sup>-60</sup>  |
|                                                               | <i>Tm1</i>                     | TPM2         | 2.0 x10 <sup>-47</sup>  |
|                                                               | <i>CG40067</i>                 | FGL1         | 2.0 x10 <sup>-46</sup>  |
|                                                               | <i>CG33281</i>                 | SLC2A2       | 1.0 x10 <sup>-20</sup>  |
|                                                               | <i>iHog</i>                    | BOC          | 5.0 x10 <sup>-19</sup>  |
|                                                               | <i>mus101</i>                  | ECT2         | 2.0 x10 <sup>-18</sup>  |
|                                                               | <i>Jon65Aii</i>                | KLK7         | 3.0 x10 <sup>-11</sup>  |
| Dauer <i>et al.</i> , 2005<br>(human A549 lung cells)         | <i>Hsp70Bb</i>                 | HSPA1A       | 0.0                     |
|                                                               | <i>LpR1</i>                    | LDLR         | 1.0 x10 <sup>-134</sup> |
|                                                               | <i>CG1718</i>                  | ABCA1        | 1.0 x10 <sup>-130</sup> |
|                                                               | <i>GlcT-1</i>                  | UGCG         | 1.0 x10 <sup>-121</sup> |
|                                                               | <i>DnaJ-1</i>                  | DNAJB4       | 1.0 x10 <sup>-94</sup>  |
|                                                               | <i>CG11426</i>                 | PPAP2B       | 2.0 x10 <sup>-36</sup>  |
|                                                               | <i>CG11940</i>                 | GRB14        | 1.0 x10 <sup>-33</sup>  |
|                                                               | <i>CG4842</i>                  | HPGD         | 3.0 x10 <sup>-30</sup>  |

## Supplemental Table 4: Q-PCR primers

| Target        | Species                | Forward/Reverse | Sequence (5'->3')        |
|---------------|------------------------|-----------------|--------------------------|
| ATOH8         | <i>H. sapiens</i>      | F               | TCAGCTTCTCCGAGTGTGTG     |
| ATOH8         | <i>H. sapiens</i>      | R               | ACAGTGGTGGCCTTGGTCTT     |
| $\beta$ actin | <i>H. sapiens</i>      | F               | CTGGAACGGTGAAGGTGACA     |
| $\beta$ actin | <i>H. sapiens</i>      | R               | AAGGGACTTCCTGTAAACAATGCA |
| GNAL          | <i>H. sapiens</i>      | F               | AAGAGCATAGCCCCTATCACTG   |
| GNAL          | <i>H. sapiens</i>      | R               | TCGTTGGATCTCTCAAAGCA     |
| GNAS          | <i>H. sapiens</i>      | F               | AGGGAACTTTTGTGGCCTTT     |
| GNAS          | <i>H. sapiens</i>      | R               | CCACCCATAGGGCATGATTA     |
| LITAF         | <i>H. sapiens</i>      | F               | GCAGGACGTGGACCATTACT     |
| LITAF         | <i>H. sapiens</i>      | R               | CCCCAAAAGAAGACATGAA      |
| LLGL1         | <i>H. sapiens</i>      | F               | GAGCTTTTCGCCTTCAACAA     |
| LLGL1         | <i>H. sapiens</i>      | R               | ATGGCCATGATGCGAAGT       |
| March2        | <i>H. sapiens</i>      | F               | AGTTTGCAGTGGAGAAACGG     |
| March2        | <i>H. sapiens</i>      | R               | TCTTCAGGCGAACTTTCTGG     |
| March8        | <i>H. sapiens</i>      | F               | CCAAAGAAAAGGAGAGGGAA     |
| March8        | <i>H. sapiens</i>      | R               | GGAGGACTCCCAGCCTTAGA     |
| PARD3         | <i>H. sapiens</i>      | F               | GGAACATGGAGATGGAGGAA     |
| PARD3         | <i>H. sapiens</i>      | R               | TGGATCCTGCTCATCAAACA     |
| PSD3          | <i>H. sapiens</i>      | F               | GCAAATCTGCAAGGGGTAAA     |
| PSD3          | <i>H. sapiens</i>      | R               | ACTGCCCATTCAGCTTCTC      |
| REG1A         | <i>H. sapiens</i>      | F               | TCAATGTCTGGATTGGCCTC     |
| REG1A         | <i>H. sapiens</i>      | R               | CAATGCCCCAGGACTTGTAG     |
| SOCS3         | <i>H. sapiens</i>      | F               | GGCTCAGCCCCAAGGAC        |
| SOCS3         | <i>H. sapiens</i>      | R               | GAGCCAGCGTGGATCTG        |
| TGF $\beta$ I | <i>H. sapiens</i>      | F               | CCCTGGACACCAACTATTGC     |
| TGF $\beta$ I | <i>H. sapiens</i>      | R               | CTCCAGCCGAGGTCCTT        |
| TMPRSS13      | <i>H. sapiens</i>      | F               | ATCGGGTGCGTGCTCCTCCT     |
| TMPRSS13      | <i>H. sapiens</i>      | R               | CCCGTCACAGCGAACAGCGT     |
| Wnt9A         | <i>H. sapiens</i>      | F               | CTTCGGCCGCTACTTC         |
| Wnt9A         | <i>H. sapiens</i>      | R               | GTCGCAGGCCTTGTAGTGC      |
| Wnt9B         | <i>H. sapiens</i>      | F               | GCCGCCTCCTACTTCGG        |
| Wnt9B         | <i>H. sapiens</i>      | R               | GTCACACTGCTTCAGGTGGG     |
| AttD          | <i>D. melanogaster</i> | F               | GGAGTAAGGGTCCGGTATGA     |
| AttD          | <i>D. melanogaster</i> | R               | CGATCGGCTATGACTGTGAA     |
| Baz           | <i>D. melanogaster</i> | F               | GGCACCTATCAGCGGAATAA     |
| Baz           | <i>D. melanogaster</i> | R               | AAACTGGGCATTAGCACTGG     |
| CG13559       | <i>D. melanogaster</i> | F               | ATCTGTCCAATGTGCCATGA     |
| CG13559       | <i>D. melanogaster</i> | R               | TGAAACAGTCGAGGATGCAG     |
| CG13912       | <i>D. melanogaster</i> | F               | AAGCCGGAATACGATCACAG     |
| CG13912       | <i>D. melanogaster</i> | R               | GATACCGGAAACGCTGACTC     |
| CG4804        | <i>D. melanogaster</i> | F               | TTCTTCAAAGCTGCGCATA      |
| CG4804        | <i>D. melanogaster</i> | R               | CAGCTCGGAAGAATTTCTGG     |
| CG9317        | <i>D. melanogaster</i> | F               | CCCCAATATGCGCTTAAAGA     |
| CG9317        | <i>D. melanogaster</i> | R               | CACAACAGCCGACAGAAAGA     |
| socs36E       | <i>D. melanogaster</i> | F               | AAGTGCACACTGTGCAATGG     |
| socs36E       | <i>D. melanogaster</i> | R               | TTCCCCGTTTTTCACGTTATC    |
| TotA          | <i>D. melanogaster</i> | F               | TGAGGAACGGGAGAGTATCG     |
| TotA          | <i>D. melanogaster</i> | R               | GCCCTTACACCTGGAGATA      |

## Supplemental Table 5

| <b>Gene Name</b> | <b>VDRC<br/>Transformant ID</b> |
|------------------|---------------------------------|
| <i>Rh4</i>       | 46919                           |
| <i>white</i>     | 30033                           |
| <i>baz</i>       | 2914                            |
| <i>CG10764</i>   | 15516                           |
| <i>CG13559</i>   | 6643                            |
| <i>CG15211</i>   | 35704                           |
| <i>CG15678</i>   | 23784                           |
| <i>CG1572</i>    | 23220                           |
| <i>CG31158</i>   | 42321                           |
| <i>CG3829</i>    | 3829                            |
| <i>CG4080</i>    | 9026                            |
| <i>CG4793</i>    | 13203                           |
| <i>CG4804</i>    | 38018                           |
| <i>CG6014</i>    | 31067                           |
| <i>Galpha73B</i> | 17054                           |
| <i>Idgf1</i>     | 12414                           |
| <i>lgl</i>       | 51247                           |
| <i>mfas</i>      | 37888                           |
| <i>mthl3</i>     | 49623                           |
| <i>net</i>       | 41069                           |
| <i>pxb</i>       | 24932                           |
| <i>socs36E</i>   | 51821                           |
| <i>stat92e</i>   | 43866                           |
| <i>totA</i>      | 14415                           |
| <i>wnt4</i>      | 38010                           |
